# Supplementary material for: Biogeography of the Southern Ocean: environmental factors driving mesoplankton distribution South of Africa
Source: PeerJ journal article supplement (doi:10.7717/peerj.11411), 2021-05-10

Appendix 8. Results from the cluster analysis (Bray-Curtis qualitative index) for samples collected within the intermediate layer. Colored figures on bottom indicate robust clusters.

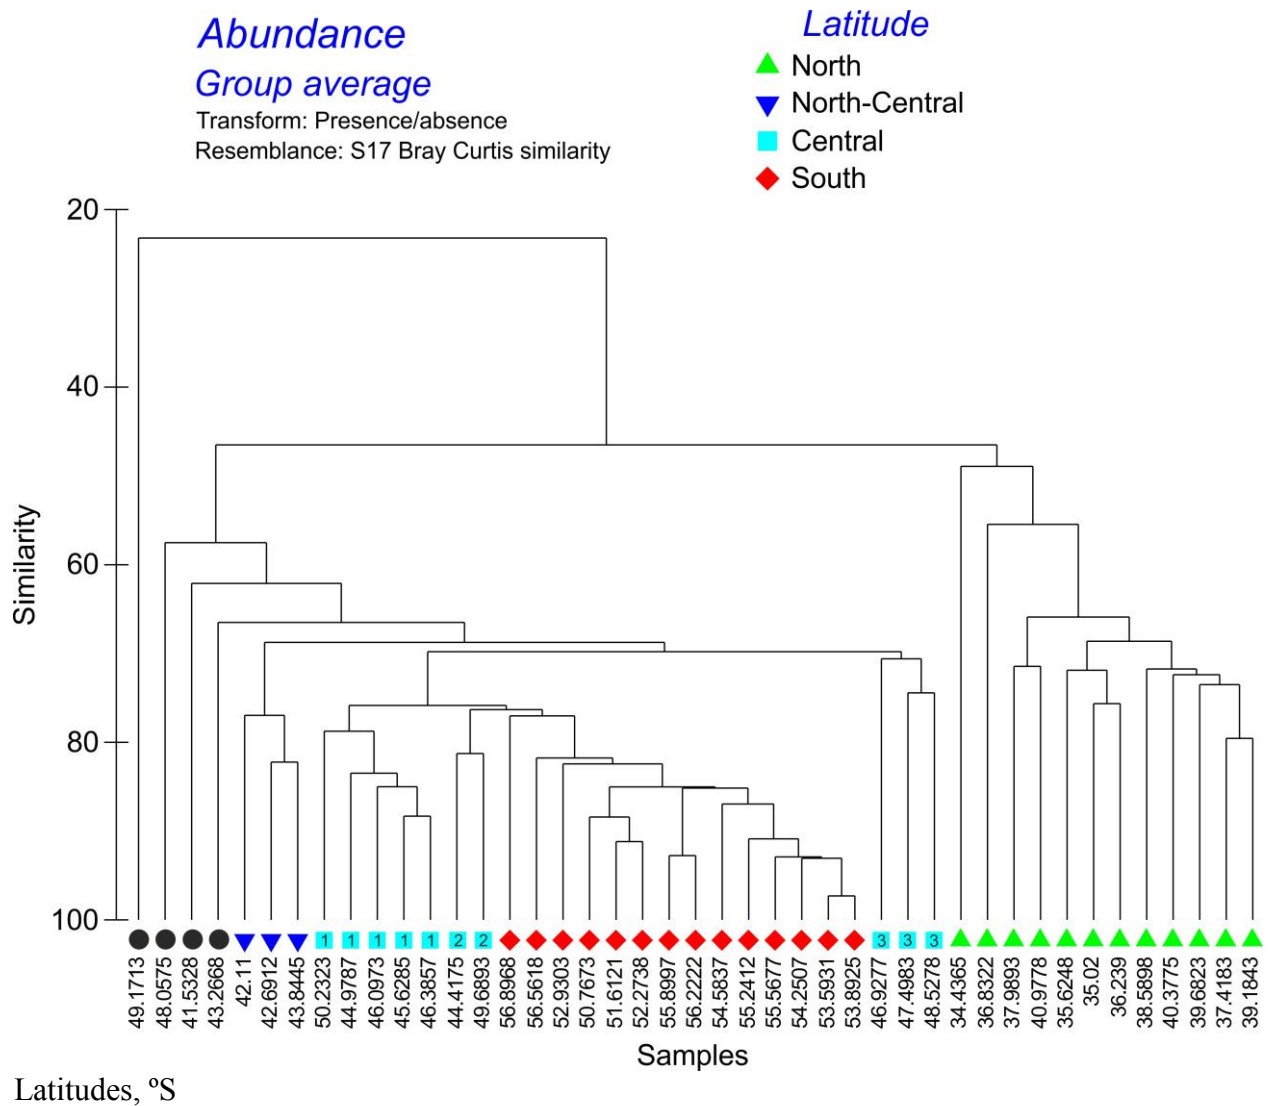

Supplement: Appendix_8.pdf [file Appendix_8.pdf]
