# Supplementary material for: Biogeography of the Southern Ocean: environmental factors driving mesoplankton distribution South of Africa
Source: PeerJ journal article supplement (doi:10.7717/peerj.11411), 2021-05-10

Appendix 9. Results from the cluster analysis (Bray-Curtis qualitative index) for samples collected within the deep layer. Colored figures on bottom indicate robust clusters.

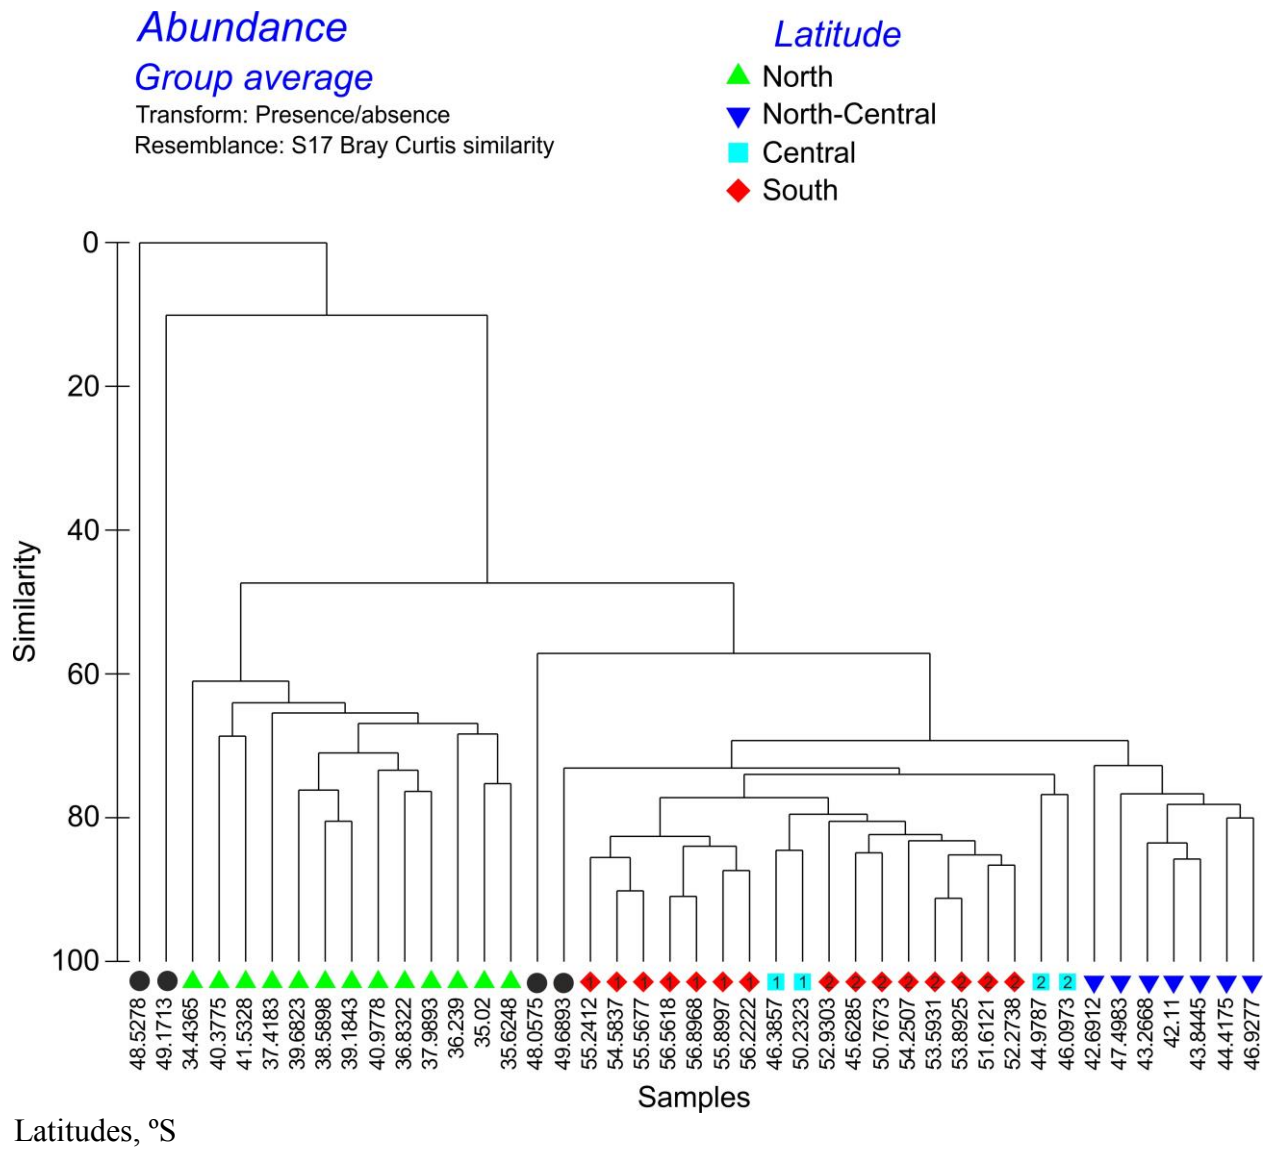

Supplement: Appendix_9.pdf [file Appendix_9.pdf]
