# Supplementary material for: Biogeography of the Southern Ocean: environmental factors driving mesoplankton distribution South of Africa
Source: PeerJ. 2021 May 10;9:e11411. doi: 10.7717/peerj.11411 (PMC8117931; doi:10.7717/peerj.11411)
Supplement: Supplemental Information 12 [file peerj-09-11411-s012.xlsx]

## Sheet: Layers 1-2-3 Zone test Combined
Layer	Station	Hydro Zone	Temperature Av	Temperature Surface	Temperature 300 m	Salinity Av	Salinity Surface	Salinity 300 m	Latitude, S	Longitude, E	Light conditions	10S	11S	12S	Q4S	10L	11L	12L	Q4L		Acartia longiremis (Lilljeborg, 1853)	Aegistus dubius	Aetideopsis carinata Bradford, 1969	Aetideopsis rostrata Sars G.O., 1903	Aetideus acutus Farran, 1929	Aetideus armatus (Boeck, 1872)	Aetideus australis (Vervoort, 1957)	Aetideus giesbrechti Cleve, 1904	Amphipoda	Amphipoda Cyphocaris	Amphipoda Eupronoe	Amphipoda Hyperia	Amphipoda larvae	Amphipoda Phronima	Amphipoda Rhabdosoma	Amphipoda Scina	Amphipoda Streetsia	Amphipoda Themisto	Amphipoda Vibilia	Appendicularia	Bivalvia larvae	Bryozoa larvae	Calanoides acutus (Giesbrecht, 1902)	Calanus propinquus Brady, 1883	Calanus simillimus Giesbrecht, 1902	Calocalanus sp.	Calocalanus contractus Farran, 1926	Calocalanus pavo (Dana, 1852)	Calocalanus styliremis Giesbrecht, 1888
1	2206	1	18.79	18.81	15.2	35.54	35.62	35.43	34.4365	14.4093	2	0.339204	0.304788	0.19421	0.838202	0.682847	0.606046	0.416787	0.56856		0	0	0	0	0	0	0	0.0440917	0	0	0	0	0	0.0146972	0	0	0	0	0	0.0734862	0	0	0	0.0734862	0	0	0	0	0
1	2208	1	19.26	19.28	13.57	35.58	35.58	35.18	35.02	14.0642	1	0.329714	0.333195	0.206422	0.869331	0.502769	0.45787	0.286098	0.415579		97.5	0	0	0	0	0	0	0	0	0	0	0	0.25	1.5	0	0	0	0	0.5	0.75	0.5	0.25	0.25	1	0	15.75	0	0	46.5
1	2210	1	18.7	18.7	15.29	35.62	35.62	35.44	35.6248	13.6818	2	0.324902	0.393015	0.191996	0.909913	0.332584	0.396252	0.226889	0.318575		1.95122	0	0	0	0	0	0	0	0	0	0	0	0	0	0	0	0	0	0	0.487805	0	0	0	0	0	0	1.95122	0	1.21951
1	2212	1	18.65	18.65	14.81	35.62	35.62	35.4	36.239	13.308	0	0.336162	0.390487	0.177014	0.903663	0.330853	0.39566	0.218029	0.314847		213.333	0	0	0	0	0	0	0	0	0	0	0.333333	0	0	0	0	0	0	0	8	0	0	0	2.33333	0	0	34.6667	0	6.66667
1	2214	1	18.44	18.45	12.47	35.61	35.61	35.1	36.8322	12.9385	2	0.332075	0.342623	0.21406	0.888758	0.340843	0.378567	0.234217	0.317876		5.85366	0	0	0	0	0	0	0	0	0	0	0	0	0	0	0	0	0	0	0	0	0	0	0	0	0	0.243902	0	0
1	2216	1	17.37	17.39	11.42	35.59	35.6	35	37.4183	12.5513	1	0.313152	0.321509	0.303518	0.938179	0.350599	0.369087	0.283286	0.334324		8.33333	0	0	0	0	0	0	0	0	0	0	0	0	0.333333	0	0	0	0	0	0.333333	0	0	0	0	0	0	2	0	0
1	2218	1	15.75	15.75	8.85	35.2	35.2	34.6	37.9893	12.1565	2	0.296603	0.339582	0.38951	1.0257	0.348743	0.362456	0.333565	0.348255		1.71429	0	0	0	0	0	0	0	0	0	0	0	0	0	0	0	0	0	0.571429	0.285714	0	0	0	0	0	0	7.14286	0	2.85714
1	2220	1	16.23	16.33	9.25	35.44	35.44	34.7	38.5898	11.7487	2	0.293287	0.351644	0.428409	1.07334	0.324049	0.362139	0.362168	0.349452		18	0	0	0	0	0	0	0	0	0	0	0	0	0	0	0	0	0	0	120	0	0	4.5	0	0	0	105	0	2.5
1	2222	1	16.56	16.56	11.34	35.57	35.57	34.89	39.1843	11.3302	2	0.272812	0.372144	0.424315	1.06927	0.28628	0.368093	0.367388	0.340587		54	0	0	0	0	0	0	0	0	0	0	0.666667	0	0	0	0	0	0	0	3.66667	0	0	0	0	0	0	24	0	3.33333
1	2224	1	16.98	17.09	14.99	35.6	35.6	35.41	39.6823	10.9302	2	0.251796	0.390853	0.403351	1.046	0.262219	0.38552	0.361754	0.336498		10.4167	0	0	0	0	0	0	0	0	0	0	0.0714286	0	0	0	0	0	0	0	0	0	0	0	0	0	0	0.785714	0	0
1	2226	1	16.79	16.87	13.15	35.6	35.6	35.19	40.3775	10.532	1	0.254595	0.406448	0.402265	1.06331	0.248569	0.413025	0.362392	0.341329		184	0	0	0	0	0	0	0	0	0	0	0.138889	0	0	0	0	0	0	0	1.38889	0	0	0.138889	1.25	0	0	48.6111	0	122.222
1	2228	1	15.9	16.17	9.86	35.46	35.46	34.79	40.9778	10.0573	2	0.265559	0.36091	0.361892	0.988361	0.255078	0.406584	0.342722	0.334795		5.12821	0.39604	0	0	0	0	0	0	0	0	0	0.19802	0	0	0	0	0	0	0	1.88119	0	0.0990099	0	0	0	0	49.901	0	8.0198
1	2230	1	16	16.04	9.4	35.45	35.43	34.73	41.5328	9.6432	0	0.268344	0.365122	0.331829	0.965295	0.279805	0.382256	0.32558	0.329214		28.4444	0.666667	0	0	0	0	0	0	0	0	0	0	0	0	0	0	0	0	0	17.7778	0	0	1.11111	1.77778	0	0	92.4444	0	0
1	2230	2	16	16.04	9.4	35.45	35.43	34.73	41.5328	9.6432	0	0.268344	0.365122	0.331829	0.965295	0.279805	0.382256	0.32558	0.329214		28.4444	0.666667	0	0	0	0	0	0	0	0	0	0	0	0	0	0	0	0	0	17.7778	0	0	1.11111	1.77778	0	0	92.4444	0	0
1	2232	2	10.4	11.67	7.22	34.43	34.47	34.41	42.11	9.1905	2	0.274894	0.378159	0.334374	0.987427	0.298919	0.361494	0.307003	0.322472		0	0	0	0	0	0	0	0	0	0	0	1.16667	0	0	0	0	0	0	0	54.1667	0	0	0	0.333333	0	0	58.6667	0	0
1	2234	2	10.46	11.48	6.79	34.38	34.39	34.37	42.6912	8.7402	0	0.318139	0.346154	0.291943	0.956236	0.301607	0.343966	0.288362	0.311312		0	0	0	0	0	0	0	0	0	0	0	3.2	0	0	0	0	0	0	0	592	0	0	0	39	0.8	0.6	20	0	0
1	2236	2	9.92	11	7.61	34.38	34.4	34.43	43.2668	8.2662	2	0.300863	0.305001	0.252769	0.858633	0.300648	0.316247	0.271787	0.296227		0	0	0	0	0	0	0	0	0	0	0	0.163934	0	0	0	0	0	0	0	3.11475	0	0	0	0	0	0	2.62295	0	0
1	2238	2	10.26	10.72	7.18	34.49	34.51	34.42	43.8445	7.7982	0	0.313987	0.284463	0.244399	0.842849	0.291072	0.27958	0.283203	0.284618		0	0	0	0	0	0	0	0	0	0	0	4.2623	0	0	0	0	0	0	0	45.9016	0	0	0	249.18	0	0	57.377	0	0
1	2240	2	8.7	9.51	5.18	34.26	34.27	34.22	44.4175	7.326	2	0.310208	0.262123	0.35158	0.923911	0.281902	0.254952	0.302912	0.279922		0	0	0	0	0	0.123457	0	0	0	0	0	0.740741	0	0	0	0	0	0	0	1669.14	0	0	0	19.1358	58.0247	0	1.7284	0	0
1	2242	2	7.46	7.63	4	33.86	33.84	34.14	44.9787	6.8065	0	0.274947	0.258623	0.426348	0.959918	0.26232	0.24935	0.326332	0.279334		0	0	0	0	0	0	0	0	0	0	0	5	0	0	0	0	0	0	0	128	0	0	1.2	0.2	20	0	0	0	0
1	2242	3	7.46	7.63	4	33.86	33.84	34.14	44.9787	6.8065	0	0.274947	0.258623	0.426348	0.959918	0.26232	0.24935	0.326332	0.279334		0	0	0	0	0	0	0	0	0	0	0	5	0	0	0	0	0	0	0	128	0	0	1.2	0.2	20	0	0	0	0
1	2244	3	6.81	7.16	3.66	33.8	33.8	34.12	45.6285	6.1333	2	0.215755	0.243366	0.378855	0.837976	0.228123	0.233776	0.342435	0.268111		0	0	0	0	0	0	0	0	0	0	0	7.4	0	0	0	0	0	0	0	67.2	0	0	2.6	0	16	0	0	0	0
1	2246	3	7.14	7.4	3.44	33.74	33.77	34.11	46.0973	5.7627	0	0.200167	0.206945	0.350063	0.757175	0.206353	0.221844	0.328748	0.252315		0	0	0	0	0	0	0	0	0	0	0	5.25	0	0	0	0	0	0	0	328	0	0	0	0	14.75	0	0	0	0
1	2247	3	6.73	7	3.66	33.74	33.77	34.12	46.3857	5.5047	1	0.193931	0.191607	0.346347	0.731885	0.198516	0.212112	0.320173	0.2436		0	0	0	0	0	0	0	0	0	0	0	4.16667	0	0	0	0	0	0	0	280	0	0	0.5	0	88.3333	0	0	0	0
1	2249	3	6.81	7.2	3.77	33.84	33.83	34.12	46.9277	4.97	2	0.185835	0.179176	0.311946	0.676957	0.19388	0.203421	0.306689	0.234663		0	0	0	0	0	0	0	0	0	0	0	2.06897	0	0	0	0	0	0	0	20.6897	0	0	2.75862	0	12.7586	0	0	0	0
1	2251	3	7.1	7.09	3.68	33.8	33.8	34.12	47.4983	4.422	1	0.190792	0.192447	0.292075	0.675314	0.199685	0.206484	0.279501	0.228557		0	0	0	0	0	0	0	0	0	0	0	0	0	3	0	0	0	0	0	284	0	0	0.5	0	6	0	0	0	0
1	2253	3	6.75	6.9	3.65	33.77	33.78	34.11	48.0575	3.996	2	0.205953	0.207589	0.258295	0.671837	0.221505	0.231312	0.278003	0.243607		0	0	0	0	0	0	0	0	0	0	0	0	0	1.38889	0	0	0	0	0	2.5	0	0	0.972222	0	23.3333	0	0	0	0
1	2255	3	6.06	6.07	3.02	33.76	33.78	34.12	48.5278	3.3028	2	0.243289	0.25495	0.261278	0.759517	0.246792	0.259978	0.295162	0.267311		0	0	0	0	0	0	0	0	0	0	0	0	0	0.16129	0	0	0	0	0	1.12903	0	0	0	0	0	0	0	0	0
1	2257	3	4.91	5.12	2.42	33.79	33.79	34.16	49.1713	2.6988	0	0.301861	0.312211	0.329356	0.943428	0.287874	0.320756	0.357259	0.321963		0	0	0	0	0	0	0	0	0	0	0	0	0	0	0	0	0	0	0	1	0	0	0	0	0.5	0	0	0	0
1	2259	3	5.02	5.03	2.35	33.79	33.79	34.17	49.6893	2.0833	2	0.327668	0.33779	0.380892	1.04635	0.309779	0.358142	0.417213	0.361711		0	0	0	0	0	0	0	0	0	0	0	0.777778	0	0	0	0	0	0	0	21.1111	0	0	0	0	0.888889	0	0	0	0
1	2261	3	4.95	5	2.6	33.79	33.78	34.13	50.2323	1.4103	0	0.336132	0.418804	0.437051	1.19199	0.322461	0.379327	0.464823	0.38887		0	0	0	0	0	0	0	0	0	0	0	0	0	1.7	0	0	0	0	0	21	0	0	0.1	0	53	0	0	0	0
1	2263	3	4.02	4.25	2.21	33.81	33.81	34.25	50.7673	0.8265	2	0.342936	0.422813	0.439515	1.20526	0.318344	0.370615	0.459215	0.382725		0	0	0	0	0	0	0	0	0	0	0	0.217391	0	0	0	0	0	0	0	21.1957	0	0	2.6087	0	63.0435	0	0	0	0
1	2263	4	4.02	4.25	2.21	33.81	33.81	34.25	50.7673	0.8265	2	0.342936	0.422813	0.439515	1.20526	0.318344	0.370615	0.459215	0.382725		0	0	0	0	0	0	0	0	0	0	0	0.217391	0	0	0	0	0	0	0	21.1957	0	0	2.6087	0	63.0435	0	0	0	0
1	2266	4	2.87	2.87	1.88	33.71	33.71	34.44	51.6121	0.0022	2	0.328496	0.333954	0.341835	1.00428	0.274965	0.312815	0.412138	0.333306		0	0	0	0	0	0	0	0.0118357	0	0	0	0	0	0	0	0	0	0	0	0	0	0	0.355072	0	0	0	0	0	0
1	2268	4	2.91	2.9	1.94	33.73	33.74	34.47	52.2738	-0.0035	2	0.241795	0.25828	0.339747	0.839822	0.242411	0.288121	0.410098	0.313543		0	0	0	0	0	0	0	0	0	0	0	1	0	0	0	0	0	0	0	3.625	0	0	13.5	1	14.5	0	0	0	0
1	2270	4	0.88	0.92	1.6	33.77	33.77	34.58	52.9303	0.1833	0	0.205089	0.292813	0.391623	0.889525	0.211941	0.28628	0.405341	0.301187		0	0	0	0	0	0	0	0	5.22222	0	0	1.33333	0	0	0	0	0	0	0	0	0	0	1.77778	4.11111	3	0	0	0	0
1	2272	4	1.25	1.29	1.61	33.74	33.75	34.58	53.5931	0.2667	2	0.199489	0.332301	0.380068	0.911858	0.215163	0.316798	0.397581	0.309847		0	0	0	0	0	0	0	0	0	0	0	1.5	0	0	0	0	0	0	0	50	0	0	2.75	7	4.125	0	0	0	0
1	2273	4	1.31	1.19	1.63	33.77	33.77	34.59	53.8925	0.0015	2	0.206167	0.334536	0.362735	0.903438	0.218494	0.32753	0.388488	0.311504		0	0	0	0	0	0	0	0	0	0	0	13.2632	0	0	0	0	0	0	0	0.315789	0	0	8.84211	9.26316	23.5789	0	0	0	0
1	2274	4	1.01	1.09	1.63	33.77	33.77	34.59	54.2507	-0.0027	2	0.214795	0.340452	0.344586	0.899833	0.22506	0.332617	0.357296	0.304991		0	0	0	0	0	0	0	0	0	0	0	3.58974	0	0	0	0	0	0	0	6.41026	0	0	17.9487	0.769231	102.564	0	0	0	0
1	2275	4	0.43	0.58	1.28	33.81	33.81	34.51	54.5837	-0.0095	1	0.21994	0.338875	0.321379	0.880194	0.227361	0.332273	0.337191	0.298942		0	0	0	0.125	0	0	0	0	0	0	0	2.875	0	0	0	0	0	0	0	21	0	0	0.5	4.625	14.375	0	0	0	0
1	2277	4	0.23	0.37	1.81	33.82	33.81	34.56	55.2412	0.003	1	0.213673	0.318484	0.279612	0.811769	0.220817	0.327453	0.302775	0.283682		0	0	0	0	0	0	0	0	0	0	0	0.375	0	0	0	0	0	0	0	8	0	0	1.125	1	4.125	0	0	0	0
1	2278	4	0.2	0.3	1.5	33.88	33.89	34.55	55.5677	0.0022	2	0.204518	0.315734	0.280917	0.801169	0.211703	0.32137	0.280533	0.271202		0	0	0	0	0	0	0	0	0	0	0	0.375	0	0	0	0	0	0	0	4.125	0	0	2	0.875	2.875	0	0	0	0
1	2279	4	0.1	0.3	1.45	33.93	33.91	34.59	55.8997	0.0013	2	0.193583	0.313545	0.278399	0.785527	0.204613	0.315773	0.269889	0.263425		0	0	0	0	0	0	0	0	0	0	0	0	0	0	0	0	0	0	0	6.66667	0	0	0	0.333333	0.777778	0	0	0	0
1	2280	4	0.16	0.29	0.5	34.09	34.04	34.57	56.2222	0.0023	1	0.188629	0.313314	0.267229	0.769172	0.199098	0.314115	0.270152	0.261122		0	0	0	0	0	0	0	0	0	0	0	0	0	0	0	0	0	0.31746	0	2.69841	0	0	0.31746	1.74603	0.952381	0	0	0	0
1	2280	5	0.16	0.29	0.5	34.09	34.04	34.57	56.2222	0.0023	1	0.188629	0.313314	0.267229	0.769172	0.199098	0.314115	0.270152	0.261122		0	0	0	0	0	0	0	0	0	0	0	0	0	0	0	0	0	0.31746	0	2.69841	0	0	0.31746	1.74603	0.952381	0	0	0	0
1	2281	5	0.1	0.2	0.83	34.14	34.14	34.65	56.5618	0.0023	0	0.193664	0.313352	0.262674	0.76969	0.197324	0.31524	0.271914	0.261493		0	0	0	0	0	0	0	0	0	0	0	0	0	0	0	0	0	0.142857	0	1.28571	0	0	0	13.2857	0.857143	0	0	0	0
1	2282	5	0.01	0.02	0.59	34.19	34.18	34.64	56.8968	-0.0098	2	0.207454	0.338328	0.262639	0.808421	0.198146	0.306117	0.280217	0.261493		0	0	0	0	0	0	0	0	0	0	0	0	0	0	0	0	0	0	0	2.6	0	0	0	1.6	1.4	0	0	0	0
2	2206	1	17.9	18.81	15.2	35.54	35.62	35.43	34.4365	14.4093	2	0.339204	0.304788	0.19421	0.838202	0.682847	0.606046	0.416787	0.56856		5.17241	0	0	0	0	0	0	0	0	0	0	0	0.517241	0	0	0	0	0	0.948276	0.0862069	0.172414	0	0	0	2.06897	0	0	1.2069	1.2931
2	2208	1	17.18	19.28	13.57	35.53	35.58	35.18	35.02	14.0642	1	0.329714	0.333195	0.206422	0.869331	0.502769	0.45787	0.286098	0.415579		12	0	0	0	2.07143	0	0	0	0	0	0	0	4.5	0.285714	0	0	0	0	0.142857	0.142857	0.0714286	0.0714286	0	1.42857	0	0	3.14286	0	1.28571
2	2210	1	18	18.7	15.29	35.59	35.62	35.44	35.6248	13.6818	2	0.324902	0.393015	0.191996	0.909913	0.332584	0.396252	0.226889	0.318575		3.79085	0	0	0	0	0	0	0.196078	0	0	0	0	0	0.457516	0.0653595	0	0.0653595	0	0	1.63399	0.0653595	0.196078	0	0.653595	0	0.457516	10.9804	0	0.784314
2	2212	1	18.09	18.65	14.81	35.6	35.62	35.4	36.239	13.308	0	0.336162	0.390487	0.177014	0.903663	0.330853	0.39566	0.218029	0.314847		20	0	0	0	0	0	0	0	1.6	0	0	0.3	1.5	0.2	0	0.3	0	0	0	0	0	0.3	0.6	4.6	0	0	11.6	0	14
2	2214	1	16.15	18.45	12.47	35.5	35.61	35.1	36.8322	12.9385	2	0.332075	0.342623	0.21406	0.888758	0.340843	0.378567	0.234217	0.317876		1.92308	0	0	0	0	0	0	0	0	0	0	0.0769231	0	0	0	0	0	0	0	0	0	0	0	0.0769231	0	0	0.769231	0	0.461538
2	2216	1	14.29	17.39	11.42	35.29	35.6	35	37.4183	12.5513	1	0.313152	0.321509	0.303518	0.938179	0.350599	0.369087	0.283286	0.334324		0.21978	0	0	0	0	0	0	0	0	0	0	0	0	0	0	0	0	0	0	0.0549451	0	0	0	0.769231	0	0	0.274725	0	0.10989
2	2218	1	11.85	15.75	8.85	34.87	35.2	34.6	37.9893	12.1565	2	0.296603	0.339582	0.38951	1.0257	0.348743	0.362456	0.333565	0.348255		0	0	0	0	0	0	0	0	0	0	0	0	0	0	0	0	0	0	0	0.47619	0	0	0	0	0	0	7.14286	0	0.357143
2	2220	1	12.73	16.33	9.25	35.07	35.44	34.7	38.5898	11.7487	2	0.293287	0.351644	0.428409	1.07334	0.324049	0.362139	0.362168	0.349452		0.375	0	0	0	0.0625	0	0	0	0	0	0	0	0	0	0	0	0	0	0	2.125	0	0.125	0.0625	0	0	0	9.375	0	0.25
2	2222	1	14.55	16.56	11.34	35.28	35.57	34.89	39.1843	11.3302	2	0.272812	0.372144	0.424315	1.06927	0.28628	0.368093	0.367388	0.340587		13.037	0	0	0	0	0	0	0	0	0	0	0.148148	0	0	0	0	0	0	0	4.74074	0.148148	0	0	1.03704	0	0	16.5926	0	47.4074
2	2224	1	16.89	17.09	14.99	35.6	35.6	35.41	39.6823	10.9302	2	0.251796	0.390853	0.403351	1.046	0.262219	0.38552	0.361754	0.336498		5	0	0	0	0	0	0	0	0.142857	0	0	0.142857	0	0	0	0	0	0	0	1.35714	0.0714286	0.142857	0	0.0714286	0	0	11.4286	0	14.2857
2	2226	1	16.7	16.87	13.15	35.59	35.6	35.19	40.3775	10.532	1	0.254595	0.406448	0.402265	1.06331	0.248569	0.413025	0.362392	0.341329		1.38889	0	0	0	0	0	0	0	0	0	0	0.138889	0	0	0	0	0	0	0	2.77778	0	0	0.277778	2.91667	0	0	17.3611	0	194.444
2	2228	1	13.31	16.17	9.86	35.16	35.46	34.79	40.9778	10.0573	2	0.265559	0.36091	0.361892	0.988361	0.255078	0.406584	0.342722	0.334795		0.166667	0.0990099	0	0	0	0	0	0	0	0	0	0.0990099	0	0.0990099	0	0	0	0	0	2.07921	0	0	0	0.19802	0	0	10.396	0	0.891089
2	2230	1	12	16.04	9.4	35.11	35.43	34.73	41.5328	9.6432	0	0.268344	0.365122	0.331829	0.965295	0.279805	0.382256	0.32558	0.329214		0	0	0	0	0	0.79646	0	0	0	0	0.0884956	0	0	0	0	0	0	0	0	0.442478	0	0	0	0.0884956	0	0	0	0	0
2	2230	2	12	16.04	9.4	35.11	35.43	34.73	41.5328	9.6432	0	0.268344	0.365122	0.331829	0.965295	0.279805	0.382256	0.32558	0.329214		0	0	0	0	0	0.79646	0	0	0	0	0.0884956	0	0	0	0	0	0	0	0	0.442478	0	0	0	0.0884956	0	0	0	0	0
2	2232	2	8.2	11.67	7.22	34.39	34.47	34.41	42.11	9.1905	2	0.274894	0.378159	0.334374	0.987427	0.298919	0.361494	0.307003	0.322472		0	0	0	0	0	1.47887	0	0	0	0	0	0.492958	0	0	0	0	0	0	0	7.39437	0	0	0	8.80282	0	0	0.0704225	0.0704225	0
2	2234	2	8.21	11.48	6.79	34.39	34.39	34.37	42.6912	8.7402	0	0.318139	0.346154	0.291943	0.956236	0.301607	0.343966	0.288362	0.311312		0	0	0	0	0	1.23529	0	0	0	0.0588235	0	0.352941	0	0	0	0.0588235	0	0	0	49.4118	0	0	0	0.0588235	0.0588235	0	0.529412	0	0
2	2236	2	8.55	11	7.61	34.4	34.4	34.43	43.2668	8.2662	2	0.300863	0.305001	0.252769	0.858633	0.300648	0.316247	0.271787	0.296227		0	0	0	0	0	0	0	0	0	0	0	0.322581	0	0	0	0	0	0	0	23.2258	0	0	0	0	2.09677	0	2.41935	0	0
2	2238	2	9.04	10.72	7.18	34.54	34.51	34.42	43.8445	7.7982	0	0.313987	0.284463	0.244399	0.842849	0.291072	0.27958	0.283203	0.284618		0	0	0	0	0	1.02564	0	0	0	0	0	0.0854701	0	0	0	0	0	0	0	1.28205	0	0	0	34.188	0	0	14.359	0	0
2	2240	2	6.99	9.51	5.18	34.25	34.27	34.22	44.4175	7.326	2	0.310208	0.262123	0.35158	0.923911	0.281902	0.254952	0.302912	0.279922		0	0	0	0	0	1.07527	0	0	0	0	0	0.107527	0	0.107527	0	0	0	0	0	9.46237	0	0	0	2.7957	0.215054	0	0.107527	0	0
2	2242	2	5.71	7.63	4	33.97	33.84	34.14	44.9787	6.8065	0	0.274947	0.258623	0.426348	0.959918	0.26232	0.24935	0.326332	0.279334		0	0	0	0	0	0	0.947368	0	0	0	0	0.842105	0	0	0	0	0	0	0	21.0526	0	0	0	0	0.526316	0	0	0	0
2	2242	3	5.71	7.63	4	33.97	33.84	34.14	44.9787	6.8065	0	0.274947	0.258623	0.426348	0.959918	0.26232	0.24935	0.326332	0.279334		0	0	0	0	0	0	0.947368	0	0	0	0	0.842105	0	0	0	0	0	0	0	21.0526	0	0	0	0	0.526316	0	0	0	0
2	2244	3	4.76	7.16	3.66	33.84	33.8	34.12	45.6285	6.1333	2	0.215755	0.243366	0.378855	0.837976	0.228123	0.233776	0.342435	0.268111		0	0	0	0	0	1.62602	0	0	0	0	0	2.11382	0	0	0	0	0	0	0	16.2602	0	0	0.162602	0.487805	38.2114	0	0	0	0
2	2246	3	5.2	7.4	3.44	33.79	33.77	34.11	46.0973	5.7627	0	0.200167	0.206945	0.350063	0.757175	0.206353	0.221844	0.328748	0.252315		0	0	0	0	0	0.0769231	0	0	0	0	0	1.15385	0	0	0	0	0	0	0	55.3846	0.0769231	0	0.384615	0	23.0769	0	0	0	0
2	2247	3	4.61	7	3.66	33.81	33.77	34.12	46.3857	5.5047	1	0.193931	0.191607	0.346347	0.731885	0.198516	0.212112	0.320173	0.2436		0	0	0	0	0	0.434783	0	0	0	0	0	1.13043	0	0	0	0	0	0	0	7.65217	0	0	0.695652	0.347826	5.3913	0	0	0	0
2	2249	3	4.98	7.2	3.77	33.92	33.83	34.12	46.9277	4.97	2	0.185835	0.179176	0.311946	0.676957	0.19388	0.203421	0.306689	0.234663		0	0	0	0	0	0	0	0	0	0	0	0	0	0	0	0	0	0	0	0.342466	0	0	0	0	0.342466	0	0	0	0
2	2251	3	5.31	7.09	3.68	33.93	33.8	34.12	47.4983	4.422	1	0.190792	0.192447	0.292075	0.675314	0.199685	0.206484	0.279501	0.228557		0	0	0	0	0	0	0	0	0	0	0	0	0	0	0	0	0	0	0	0.9375	0	0	0	0	0.0625	0	0	0	0
2	2253	3	4.35	6.9	3.65	33.9	33.78	34.11	48.0575	3.996	2	0.205953	0.207589	0.258295	0.671837	0.221505	0.231312	0.278003	0.243607		0	0	0	0	0	0	0	0	0	0	0	0	0	0	0	0	0	0	0	0	0	0	0.25	0	1	0	0	0	0
2	2255	3	4.23	6.07	3.02	33.86	33.78	34.12	48.5278	3.3028	2	0.243289	0.25495	0.261278	0.759517	0.246792	0.259978	0.295162	0.267311		0	0	0	0	0	0	0	0	0	0	0	0	0	0	0	0	0	0	0	0.245902	0	0	0	0	0.245902	0	0	0	0
2	2257	3	3.11	5.12	2.42	33.89	33.79	34.16	49.1713	2.6988	0	0.301861	0.312211	0.329356	0.943428	0.287874	0.320756	0.357259	0.321963		0	0	0	0	0	0	0	0	0	0	0	0	0	0	0	0	0	0	0	0	0	0	0	0	0	0	0	0	0
2	2259	3	3.35	5.03	2.35	33.88	33.79	34.17	49.6893	2.0833	2	0.327668	0.33779	0.380892	1.04635	0.309779	0.358142	0.417213	0.361711		0	0	0	0	0	0	0	0.103093	0	0	0	0.103093	0	0	0	0	0	0	0	0.927835	0	0	0	0	22.268	0	0	0	0
2	2261	3	3.47	5	2.6	33.86	33.78	34.13	50.2323	1.4103	0	0.336132	0.418804	0.437051	1.19199	0.322461	0.379327	0.464823	0.38887		0	0	0	0	0	0	0	0.25	0	0	0	0.5	0	0	0	0	0	0	0	1.375	0	0	0.25	0	6.25	0	0	0	0
2	2263	3	1.78	4.25	2.21	33.95	33.81	34.25	50.7673	0.8265	2	0.342936	0.422813	0.439515	1.20526	0.318344	0.370615	0.459215	0.382725		0	0	0	0	0	0	0	0.288462	0	0	0	0	0	0	0	0.0961538	0	0	0	67.6923	0	0	1.92308	0.0961538	3.84615	0	0	0	0
2	2263	4	1.78	4.25	2.21	33.95	33.81	34.25	50.7673	0.8265	2	0.342936	0.422813	0.439515	1.20526	0.318344	0.370615	0.459215	0.382725		0	0	0	0	0	0	0	0.288462	0	0	0	0	0	0	0	0.0961538	0	0	0	67.6923	0	0	1.92308	0.0961538	3.84615	0	0	0	0
2	2266	4	1.32	2.87	1.88	33.88	33.71	34.44	51.6121	0.0022	2	0.328496	0.333954	0.341835	1.00428	0.274965	0.312815	0.412138	0.333306		0	0	0	0	0	0	0	0	0	0	0	0	0	0	0	0	0	0	0	0.272727	0	0	1.63636	0.727273	6.09091	0	0	0	0
2	2268	4	1.44	2.9	1.94	33.95	33.74	34.47	52.2738	-0.0035	2	0.241795	0.25828	0.339747	0.839822	0.242411	0.288121	0.410098	0.313543		0	0	0	0	0	0	0	0.111111	0	0	0	0.222222	0	0	0	0	0	0	0	0	0	0	2.33333	0.666667	1	0	0	0	0
2	2270	4	0.24	0.92	1.6	34.06	33.77	34.58	52.9303	0.1833	0	0.205089	0.292813	0.391623	0.889525	0.211941	0.28628	0.405341	0.301187		0	0	0	0	0	0	0	0	0	0	0	0.3	0	0	0	0	0	0	0	0.4	0	0	0.4	0.2	0.7	0	0	0	0
2	2272	4	0.14	1.29	1.61	34.03	33.75	34.58	53.5931	0.2667	2	0.199489	0.332301	0.380068	0.911858	0.215163	0.316798	0.397581	0.309847		0	0	0	0	0	0	0	0	0	0	0	0.165289	0	0	0	0	0	0	0	0.413223	0	0	0.826446	7.43802	7.85124	0	0	0	0
2	2273	4	0.31	1.19	1.63	34.04	33.77	34.59	53.8925	0.0015	2	0.206167	0.334536	0.362735	0.903438	0.218494	0.32753	0.388488	0.311504		0	0	0	0	0	0	0	0.16	0	0	0	3.28	0	0	0	0	0	0	0	0.16	0	0	0.32	1.36	1.52	0	0	0	0
2	2274	4	0.27	1.09	1.63	34.01	33.77	34.59	54.2507	-0.0027	2	0.214795	0.340452	0.344586	0.899833	0.22506	0.332617	0.357296	0.304991		0	0	0	0	0	0	0	0	0	0	0	2.88344	0	0	0	0	0	0	0	0.981595	0	0	0.490798	4.84663	1.28834	0	0	0	0
2	2275	4	-0.81	0.58	1.28	33.94	33.81	34.51	54.5837	-0.0095	1	0.21994	0.338875	0.321379	0.880194	0.227361	0.332273	0.337191	0.298942		0	0	0	0	0	0	0	0	0	0	0	0.10101	0	0	0	0	0	0	0	8.18182	0	0	0.40404	0.40404	0.808081	0	0	0	0
2	2277	4	-0.2	0.37	1.81	34.06	33.81	34.56	55.2412	0.003	1	0.213673	0.318484	0.279612	0.811769	0.220817	0.327453	0.302775	0.283682		0	0	0	0	0	0	0	0	0	0	0	0.2	0	0	0	0	0	0	0	19.8	0	0	2.4	0.1	1.5	0	0	0	0
2	2278	4	-0.09	0.3	1.5	34.1	33.89	34.55	55.5677	0.0022	2	0.204518	0.315734	0.280917	0.801169	0.211703	0.32137	0.280533	0.271202		0	0	0	0	0	0	0	0	0	0	0	0.3	0	0	0	0	0	0	0	8.8	0	0	0.8	0.3	1	0	0	0	0
2	2279	4	-0.39	0.3	1.45	34.13	33.91	34.59	55.8997	0.0013	2	0.193583	0.313545	0.278399	0.785527	0.204613	0.315773	0.269889	0.263425		0	0	0	0	0	0	0	0	0	0	0	0	0	0	0	0	0	0.2	0	76.8	0	0	3.8	2.1	2.5	0	0	0	0
2	2280	4	-0.53	0.29	0.5	34.26	34.04	34.57	56.2222	0.0023	1	0.188629	0.313314	0.267229	0.769172	0.199098	0.314115	0.270152	0.261122		0	0	0	0	0	0	0	0	0	0	0	0	0	0	0	0	0	0.140845	0	19.7183	0	0	3.4507	2.11268	0.492958	0	0	0	0
2	2280	4	-0.53	0.29	0.5	34.26	34.04	34.57	56.2222	0.0023	1	0.188629	0.313314	0.267229	0.769172	0.199098	0.314115	0.270152	0.261122		0	0	0	0	0	0	0	0	0	0	0	0	0	0	0	0	0	0.140845	0	19.7183	0	0	3.4507	2.11268	0.492958	0	0	0	0
2	2281	4	-0.28	0.2	0.83	34.34	34.14	34.65	56.5618	0.0023	0	0.193664	0.313352	0.262674	0.76969	0.197324	0.31524	0.271914	0.261493		0	0	0	0	0	0	0	0	0	0	0	0	0	0	0	0.142857	0	0.571429	0	28.5714	0	0	1.92857	0.285714	0.214286	0	0	0	0
2	2282	4	-0.348	0.02	0.59	34.306	34.18	34.64	56.8968	-0.0098	2	0.207454	0.338328	0.262639	0.808421	0.198146	0.306117	0.280217	0.261493		0	0	0	0	0	0	0	0	0	0	0	0	0	0	0	0	0	0.133333	0	13.9333	0	0	0.133333	2.13333	0	0	0	0	0
3	2206	1	16.61	18.81	15.2	35.54	35.62	35.43	34.4365	14.4093	2	0.339204	0.304788	0.19421	0.838202	0.682847	0.606046	0.416787	0.56856		0	0	0	0	0	0	0	0.238095	0	0	0	0	0	0.0793651	0	0	0	0	0	0.396825	0	0	0	0.396825	0	0	0	0	0
3	2208	1	15.11	19.28	13.57	35.4	35.58	35.18	35.02	14.0642	1	0.329714	0.333195	0.206422	0.869331	0.502769	0.45787	0.286098	0.415579		0.152672	0	0	0	0	0	0	0	0	0	0	0	0	0.0763359	0	0	0	0	0	1.0687	0	0	0	0.458015	0	0.610687	0	0	0.0763359
3	2210	1	16.12	18.7	15.29	35.5	35.62	35.44	35.6248	13.6818	2	0.324902	0.393015	0.191996	0.909913	0.332584	0.396252	0.226889	0.318575		1.08108	0	0	0	0.186615	0	0	0	0	0	0	0	0.405405	0.02574	0	0	0	0	0.01287	0.01287	0.00643501	0.00643501	0	0.1287	0	0	0.28314	0	0.11583
3	2212	1	16.39	18.65	14.81	35.53	35.62	35.4	36.239	13.308	0	0.336162	0.390487	0.177014	0.903663	0.330853	0.39566	0.218029	0.314847		0.11236	0	0	0	0	0	0	0.168539	0	0	0	0	0	0.0561798	0	0.0561798	0	0	0.0561798	0.505618	0	0	0	0	0	0	0.0561798	0	0.505618
3	2214	1	13.54	18.45	12.47	35.22	35.61	35.1	36.8322	12.9385	2	0.332075	0.342623	0.21406	0.888758	0.340843	0.378567	0.234217	0.317876		0	0	0	0	0	0	0	0	0	0.0689655	0	0	0	0	0	0.0689655	0	0	0	0.0689655	0	0	0	0.689655	0	0	0.137931	0	0
3	2216	1	11.69	17.39	11.42	34.95	35.6	35	37.4183	12.5513	1	0.313152	0.321509	0.303518	0.938179	0.350599	0.369087	0.283286	0.334324		0	0	0	0	0	0	0	0	0	0	0	0	0	0.113636	0	0	0	0	0	0	0	0	0	0.340909	0	0	0.113636	0	0
3	2218	1	9.5	15.75	8.85	34.68	35.2	34.6	37.9893	12.1565	2	0.296603	0.339582	0.38951	1.0257	0.348743	0.362456	0.333565	0.348255		0	0	0	0	0	0.462963	0	0	0	0	0	0	0	0	0	0	0	0	0	0.0925926	0	0	0	0.37037	0	0	0.37037	0	0.0925926
3	2220	1	10.13	16.33	9.25	34.8	35.44	34.7	38.5898	11.7487	2	0.293287	0.351644	0.428409	1.07334	0.324049	0.362139	0.362168	0.349452		0	0	0	0	0.0980392	0	0	0.0980392	0	0	0	0	0	0	0	0.0980392	0	0	0	0.196078	0	0	0	0.490196	0	0	0.294118	0	0.0980392
3	2222	1	12.3	16.56	11.34	35.04	35.57	34.89	39.1843	11.3302	2	0.272812	0.372144	0.424315	1.06927	0.28628	0.368093	0.367388	0.340587		0	0	0	0	0.103093	0	0	0	0.103093	0	0	0	0	0	0	0.103093	0	0	0	1.13402	0	0.103093	0	0.412371	0	0	0	0	0.309278
3	2224	1	16.09	17.09	14.99	35.54	35.6	35.41	39.6823	10.9302	2	0.251796	0.390853	0.403351	1.046	0.262219	0.38552	0.361754	0.336498		0	0	0.0909091	0	1.36364	0	0	0	0	0	0	0.0909091	0	0	0	0	0	0	0	1.09091	0.0909091	0	0	3.81818	0	0	0.727273	0	0.363636
3	2226	1	14.46	16.87	13.15	35.33	35.6	35.19	40.3775	10.532	1	0.254595	0.406448	0.402265	1.06331	0.248569	0.413025	0.362392	0.341329		0.0510204	0	0	0	1.22449	0	0	0	0	0	0	0.102041	0	0	0	0	0	0	0.0510204	0.765306	0	0.102041	0.0510204	1.12245	0	0	2.65306	0	0.561224
3	2228	1	10.78	16.17	9.86	34.88	35.46	34.79	40.9778	10.0573	2	0.265559	0.36091	0.361892	0.988361	0.255078	0.406584	0.342722	0.334795		0	0	0	0	0	0.0990099	0	0	0	0	0	0	0	0.0990099	0	0	0	0	0	0.693069	0.0990099	0	0	0.594059	0	0	0.19802	0	0
3	2230	1	10.22	16.04	9.4	34.8	35.43	34.73	41.5328	9.6432	0	0.268344	0.365122	0.331829	0.965295	0.279805	0.382256	0.32558	0.329214		0	0	0	0	0	0	0.413793	0	0	0	0.0689655	0	0	0	0	0	0	0	0.0689655	0.137931	0	0	0	1.17241	0	0	1.10345	0	0.482759
3	2230	2	10.22	16.04	9.4	34.8	35.43	34.73	41.5328	9.6432	0	0.268344	0.365122	0.331829	0.965295	0.279805	0.382256	0.32558	0.329214		0	0	0	0	0	0	0.413793	0	0	0	0.0689655	0	0	0	0	0	0	0	0.0689655	0.137931	0	0	0	1.17241	0	0	1.10345	0	0.482759
3	2232	2	7.49	11.67	7.22	34.4	34.47	34.41	42.11	9.1905	2	0.274894	0.378159	0.334374	0.987427	0.298919	0.361494	0.307003	0.322472		0	0	0	0	0	0.19802	0	0	0	0	0	0	0	0	0	0	0	0	0	1.08911	0	0	0	1.18812	0	0	0.29703	0	0
3	2234	2	7.29	11.48	6.79	34.4	34.39	34.37	42.6912	8.7402	0	0.318139	0.346154	0.291943	0.956236	0.301607	0.343966	0.288362	0.311312		0	0	0	0	0	0.121951	0	0	0	0	0	0	0	0	0	0.121951	0	0	0	2.56098	0	0	0	0	0	0	0.365854	0	0
3	2236	2	7.92	11	7.61	34.42	34.4	34.43	43.2668	8.2662	2	0.300863	0.305001	0.252769	0.858633	0.300648	0.316247	0.271787	0.296227		0	0	0	0	0	0.483871	0	0	0	0	0	0	0	0	0	0	0	0	0	0.860215	0	0	0	3.3871	0	0	0	0	0
3	2238	2	7.78	10.72	7.18	34.47	34.51	34.42	43.8445	7.7982	0	0.313987	0.284463	0.244399	0.842849	0.291072	0.27958	0.283203	0.284618		0	0	0	0	0	0.0869565	0	0	0	0	0	0.0869565	0	0	0	0	0	0	0	0.26087	0	0	0	0.0869565	0	0	0	0	0
3	2240	2	6.01	9.51	5.18	34.27	34.27	34.22	44.4175	7.326	2	0.310208	0.262123	0.35158	0.923911	0.281902	0.254952	0.302912	0.279922		0	0	0	0	0	0	0	0	0	0	0	0	0	0	0	0.15748	0	0	0	0.944882	0	0	0	0	0.15748	0	0	0	0
3	2242	2	4.52	7.63	4	34.1	33.84	34.14	44.9787	6.8065	0	0.274947	0.258623	0.426348	0.959918	0.26232	0.24935	0.326332	0.279334		0	0	0	0	0	0	0.434783	0	0	0	0	0.248447	0	0	0	0.124224	0	0	0	6.45963	0.124224	0	0.0621118	0	0.124224	0	0	0	0
3	2242	3	4.52	7.63	4	34.1	33.84	34.14	44.9787	6.8065	0	0.274947	0.258623	0.426348	0.959918	0.26232	0.24935	0.326332	0.279334		0	0	0	0	0	0	0.434783	0	0	0	0	0.248447	0	0	0	0.124224	0	0	0	6.45963	0.124224	0	0.0621118	0	0.124224	0	0	0	0
3	2244	3	3.94	7.16	3.66	34.08	33.8	34.12	45.6285	6.1333	2	0.215755	0.243366	0.378855	0.837976	0.228123	0.233776	0.342435	0.268111		0	0	0	0	0	0	0	0	0	0	0	0.314961	0	0	0	0	0	0	0	2.59843	0	0	0.15748	0	0.472441	0	0	0	0
3	2246	3	3.82	7.4	3.44	34.05	33.77	34.11	46.0973	5.7627	0	0.200167	0.206945	0.350063	0.757175	0.206353	0.221844	0.328748	0.252315		0	0	0	0	0	0.238095	0	0	0	0	0	0.238095	0	0	0	0	0	0	0	6.66667	0	0	0.15873	0	0.15873	0	0	0	0
3	2247	3	3.85	7	3.66	34.08	33.77	34.12	46.3857	5.5047	1	0.193931	0.191607	0.346347	0.731885	0.198516	0.212112	0.320173	0.2436		0	0	0	0	0	0	0	0	0	0	0	0.56	0	0	0	0	0	0	0	0.88	0.08	0	0.16	0	0.16	0	0	0	0
3	2249	3	4.05	7.2	3.77	34.1	33.83	34.12	46.9277	4.97	2	0.185835	0.179176	0.311946	0.676957	0.19388	0.203421	0.306689	0.234663		0	0	0	0	0	0	0	0	0	0	0	0.208333	0	0	0	0	0	0	0	0.208333	0	0	0	0	0	0	0	0	0
3	2251	3	4.07	7.09	3.68	34.1	33.8	34.12	47.4983	4.422	1	0.190792	0.192447	0.292075	0.675314	0.199685	0.206484	0.279501	0.228557		0	0	0	0	0	0	0	0	0	0	0	0.190476	0	0	0	0	0	0	0	0.0952381	0	0	0	0	0	0	0	0	0
3	2253	3	7.1	6.9	3.65	33.8	33.78	34.11	48.0575	3.996	2	0.205953	0.207589	0.258295	0.671837	0.221505	0.231312	0.278003	0.243607		0	0	0	0	0	0	0	0	0	0	0	0	0	0	0	0	0	0	0	0	0	0	0	0	0	0	0	0	0
3	2255	3	3.28	6.07	3.02	34.09	33.78	34.12	48.5278	3.3028	2	0.243289	0.25495	0.261278	0.759517	0.246792	0.259978	0.295162	0.267311		0	0	0	0	0	0	0	0	0	0	0	0	0	0	0	0	0	0	0	0	0	0	0	0	0	0	0	0	0
3	2257	3	2.52	5.12	2.42	34.11	33.79	34.16	49.1713	2.6988	0	0.301861	0.312211	0.329356	0.943428	0.287874	0.320756	0.357259	0.321963		0	0	0	0	0	0	0	0	0	0	0	0	0	0	0	0	0	0	0	0	0	0	0	0	0	0	0	0	0
3	2259	3	2.31	5.03	2.35	34.09	33.79	34.17	49.6893	2.0833	2	0.327668	0.33779	0.380892	1.04635	0.309779	0.358142	0.417213	0.361711		0	0	0	0	0	0	0	0	0	0	0	0	0	0.185185	0	0	0	0	0	0	0.185185	0	0.555556	0	0.555556	0	0	0	0
3	2261	3	2.83	5	2.6	34.08	33.78	34.13	50.2323	1.4103	0	0.336132	0.418804	0.437051	1.19199	0.322461	0.379327	0.464823	0.38887		0	0	0	0	0	0	0	0	0	0	0	0.254237	0	0	0	0	0	0	0	0.254237	0.0847458	0	0.59322	0	0.338983	0	0	0	0
3	2263	3	2.13	4.25	2.21	34.19	33.81	34.25	50.7673	0.8265	2	0.342936	0.422813	0.439515	1.20526	0.318344	0.370615	0.459215	0.382725		0	0	0	0	0	0	0	0.185185	0	0	0	0	0	0	0	0	0	0	0	1.75926	0	0	0.185185	0.185185	0.462963	0	0	0	0
3	2263	4	2.13	4.25	2.21	34.19	33.81	34.25	50.7673	0.8265	2	0.342936	0.422813	0.439515	1.20526	0.318344	0.370615	0.459215	0.382725		0	0	0	0	0	0	0	0.185185	0	0	0	0	0	0	0	0	0	0	0	1.75926	0	0	0.185185	0.185185	0.462963	0	0	0	0
3	2266	4	1.62	2.87	1.88	34.31	33.71	34.44	51.6121	0.0022	2	0.328496	0.333954	0.341835	1.00428	0.274965	0.312815	0.412138	0.333306		0	0	0	0	0	0	0	0.0840336	0	0	0	0	0	0	0	0	0	0	0	0	0	0	2.52101	0	0	0	0	0	0
3	2268	4	1.34	2.9	1.94	34.4	33.74	34.47	52.2738	-0.0035	2	0.241795	0.25828	0.339747	0.839822	0.242411	0.288121	0.410098	0.313543		0	0	0	0	0	0	0	0.078125	0	0	0	0	0	0	0	0.390625	0	0	0	0.234375	0	0	2.10938	0	0	0	0	0	0
3	2270	4	1.34	0.92	1.6	34.49	33.77	34.58	52.9303	0.1833	0	0.205089	0.292813	0.391623	0.889525	0.211941	0.28628	0.405341	0.301187		0	0	0	0	0	0	0	0	0	0	0	0.0909091	0	0	0	0	0	0	0	0.0909091	0	0	0.454545	0	0.0909091	0	0	0	0
3	2272	4	1.34	1.29	1.61	34.49	33.75	34.58	53.5931	0.2667	2	0.199489	0.332301	0.380068	0.911858	0.215163	0.316798	0.397581	0.309847		0	0	0	0	0	0	0	0	0	0	0	0.20202	0	0	0	0	0	0	0	0	0	0	0.505051	0.505051	0.30303	0	0	0	0
3	2273	4	1.52	1.19	1.63	34.55	33.77	34.59	53.8925	0.0015	2	0.206167	0.334536	0.362735	0.903438	0.218494	0.32753	0.388488	0.311504		0	0	0	0	0	0	0	0	0	0	0	0	0	0	0	0	0	0	0	0	0	0	0.481928	1.44578	0.240964	0	0	0	0
3	2274	4	1.39	1.09	1.63	34.51	33.77	34.59	54.2507	-0.0027	2	0.214795	0.340452	0.344586	0.899833	0.22506	0.332617	0.357296	0.304991		0	0	0	0	0	0	0	0	0	0	0	0.5	0	0	0	0	0	0	0	0.1	0	0	0.2	1.2	0	0	0	0	0
3	2275	4	0.79	0.58	1.28	34.39	33.81	34.51	54.5837	-0.0095	1	0.21994	0.338875	0.321379	0.880194	0.227361	0.332273	0.337191	0.298942		0	0	0	0	0	0.0854701	0	0	0	0	0	0.25641	0	0	0	0.0854701	0	0	0	0.512821	0	0	1.19658	0	1.11111	0	0	0	0
3	2277	4	1.64	0.37	1.81	34.49	33.81	34.56	55.2412	0.003	1	0.213673	0.318484	0.279612	0.811769	0.220817	0.327453	0.302775	0.283682		0	0	0	0	0	0	0	0	0	0	0	0.08	0	0	0	0.08	0	0	0	0.24	0	0	2.64	0	0.56	0	0	0	0
3	2278	4	1.48	0.3	1.5	34.48	33.89	34.55	55.5677	0.0022	2	0.204518	0.315734	0.280917	0.801169	0.211703	0.32137	0.280533	0.271202		0	0	0	0	0	0.0847458	0	0	0	0	0	0.169492	0	0	0	0.0847458	0	0	0	0	0	0	1.52542	0	0.169492	0	0	0	0
3	2279	4	1.07	0.3	1.45	34.5	33.91	34.59	55.8997	0.0013	2	0.193583	0.313545	0.278399	0.785527	0.204613	0.315773	0.269889	0.263425		0	0	0	0	0	0.0917431	0	0	0	0	0	0	0	0	0	0.183486	0	0.550459	0	2.20183	0	0	4.58716	0	1.19266	0	0	0	0
3	2280	4	0.09	0.29	0.5	34.5	34.04	34.57	56.2222	0.0023	1	0.188629	0.313314	0.267229	0.769172	0.199098	0.314115	0.270152	0.261122		0	0	0	0	0	0	0	0	0	0	0	0	0	0	0	0.0952381	0	0.0952381	0	1.52381	0	0	6.95238	0.0952381	0.285714	0	0	0	0
3	2280	5	0.09	0.29	0.5	34.5	34.04	34.57	56.2222	0.0023	1	0.188629	0.313314	0.267229	0.769172	0.199098	0.314115	0.270152	0.261122		0	0	0	0	0	0	0	0	0	0	0	0	0	0	0	0.0952381	0	0.0952381	0	1.52381	0	0	6.95238	0.0952381	0.285714	0	0	0	0
3	2281	5	0.78	0.2	0.83	34.61	34.14	34.65	56.5618	0.0023	0	0.193664	0.313352	0.262674	0.76969	0.197324	0.31524	0.271914	0.261493		0	0	0	0	0	0	0	0	0	0	0	0	0	0	0	0	0	0.793651	0	3.65079	0	0	2.85714	0	0	0	0	0	0
3	2282	5	0.47	0.02	0.59	34.6	34.18	34.64	56.8968	-0.0098	2	0.207454	0.338328	0.262639	0.808421	0.198146	0.306117	0.280217	0.261493		0	0	0	0	0	0	0	0.10101	0	0	0	0	0	0	0	0	0	0.20202	0	16.1616	0	0	2.92929	0.30303	0	0	0	0	0
																					721.59	1.82838	0.0909091	0.125	5.1098	10.622	3.59189	2.59135	7.06817	0.127789	0.314922	85.5978	7.17265	9.88343	0.0653595	2.56295	0.0653595	3.70084	2.42056	4602.09	1.90043	1.39594	138.579	467.049	757.308	17.4182	723.839	1.27732	471.977
																					0.433921	0.000727254	5.69107e-05	7.82522e-05	0.00319882	0.00615096	0.00112429	0.00132572	0.0044248	7.99982e-05	9.85734e-05	0.0496368	0.0044902	0.0061872	4.09162e-05	0.00140687	4.09162e-05	0.00197026	0.00147214	2.69878	0.00111194	0.000873884	0.0756033	0.287702	0.417912	0.0109041	0.394573	0.000799624	0.295164
[truncated: 140 more columns]

## Sheet: Original
Sample	6	5	4	2206	9	8	7	2208	12	11	10	2210	15	14	13	2212	18	17	16	2214	21	20	19	2216	27	26	25	2218	33	32	31	2220	39	38	37	2222	45	44	43	2224	51	49	50	2226	57	56	55	2228	63
Acartia longiremis (Lilljeborg, 1853)	0	5.17241	0	2.02703	0.152672	12	97.5	18.0064	1.08108	3.79085	1.95122	2.55738	0.11236	20	213.333	27.3377	0	1.92308	5.85366	1.55063	0	0.21978	8.33333	0.966667	0	0	1.71429	0.192926	0	0.375	18	2.58278	0	13.037	54	17.1233	0	5	10.4167	4.02685	0.0510204	1.38889	184	29.2767	0	0.166667	5.12821	1.40468	0
Aegistus dubius	0	0	0	0	0	0	0	0	0	0	0	0	0	0	0	0	0	0	0	0	0	0	0	0	0	0	0	0	0	0	0	0	0	0	0	0	0	0	0	0	0	0	0	0	0	0.0990099	0.39604	0.143051	0
Aetideopsis carinata Bradford, 1969	0	0	0	0	0	0	0	0	0	0	0	0	0	0	0	0	0	0	0	0	0	0	0	0	0	0	0	0	0	0	0	0	0	0	0	0	0.0909091	0	0	0.033557	0	0	0	0	0	0	0	0	0
Aetideopsis rostrata Sars G.O., 1903	0	0	0	0	0	0	0	0	0	0	0	0	0	0	0	0	0	0	0	0	0	0	0	0	0	0	0	0	0	0	0	0	0	0	0	0	0	0	0	0	0	0	0	0	0	0	0	0	0
Aetideus acutus Farran, 1929	0	0	0	0	0	2.07143	0	0.932476	0.186615	0	0	0.0679157	0	0	0	0	0	0	0	0	0	0	0	0	0	0	0	0	0.0980392	0.0625	0	0.0662252	0.103093	0	0	0.0342466	1.36364	0	0	0.503356	1.22449	0	0	0.754717	0	0	0	0	0
Aetideus armatus (Boeck, 1872)	0	0	0	0	0	0	0	0	0	0	0	0	0	0	0	0	0	0	0	0	0	0	0	0	0.462963	0	0	0.160772	0	0	0	0	0	0	0	0	0	0	0	0	0	0	0	0	0.0990099	0	0	0.0334448	0
Aetideus australis (Vervoort, 1957)	0	0	0	0	0	0	0	0	0	0	0	0	0	0	0	0	0	0	0	0	0	0	0	0	0	0	0	0	0	0	0	0	0	0	0	0	0	0	0	0	0	0	0	0	0	0	0	0	0.413793
Aetideus giesbrechti Cleve, 1904	0.238095	0	0.0440917	0.109395	0	0	0	0	0	0.196078	0	0.0983607	0.168539	0	0	0.0974026	0	0	0	0	0	0	0	0	0	0	0	0	0.0980392	0	0	0.0331126	0	0	0	0	0	0	0	0	0	0	0	0	0	0	0	0	0
Amphipoda	0	0	0	0	0	0	0	0	0	0	0	0	0	1.6	0	0.519481	0	0	0	0	0	0	0	0	0	0	0	0	0	0	0	0	0.103093	0	0	0.0342466	0	0.142857	0	0.0671141	0	0	0	0	0	0	0	0	0
Amphipoda Cyphocaris	0	0	0	0	0	0	0	0	0	0	0	0	0	0	0	0	0.0689655	0	0	0.0316456	0	0	0	0	0	0	0	0	0	0	0	0	0	0	0	0	0	0	0	0	0	0	0	0	0	0	0	0	0
Amphipoda Eupronoe	0	0	0	0	0	0	0	0	0	0	0	0	0	0	0	0	0	0	0	0	0	0	0	0	0	0	0	0	0	0	0	0	0	0	0	0	0	0	0	0	0	0	0	0	0	0	0	0	0.0689655
Amphipoda Hyperia	0	0	0	0	0	0	0	0	0	0	0	0	0	0.3	0.333333	0.12987	0	0.0769231	0	0.0316456	0	0	0	0	0	0	0	0	0	0	0	0	0	0.148148	0.666667	0.205479	0.0909091	0.142857	0.0714286	0.112176	0.102041	0.138889	0.138889	0.116177	0	0.0990099	0.19802	0.0913938	0
Amphipoda larvae	0	0.517241	0	0.202703	0	4.5	0.25	2.05788	0.405405	0	0	0.147541	0	1.5	0	0.487013	0	0	0	0	0	0	0	0	0	0	0	0	0	0	0	0	0	0	0	0	0	0	0	0	0	0	0	0	0	0	0	0	0
Amphipoda Phronima	0.0793651	0	0.0146972	0.036465	0.0763359	0.285714	1.5	0.353698	0.02574	0.457516	0	0.238876	0.0561798	0.2	0	0.0974026	0	0	0	0	0.113636	0	0.333333	0.0666667	0	0	0	0	0	0	0	0	0	0	0	0	0	0	0	0	0	0	0	0	0.0990099	0.0990099	0	0.0731812	0
Amphipoda Rhabdosoma	0	0	0	0	0	0	0	0	0	0.0653595	0	0.0327869	0	0	0	0	0	0	0	0	0	0	0	0	0	0	0	0	0	0	0	0	0	0	0	0	0	0	0	0	0	0	0	0	0	0	0	0	0
Amphipoda Scina	0	0	0	0	0	0	0	0	0	0	0	0	0.0561798	0.3	0	0.12987	0.0689655	0	0	0.0316456	0	0	0	0	0	0	0	0	0.0980392	0	0	0.0331126	0.103093	0	0	0.0342466	0	0	0	0	0	0	0	0	0	0	0	0	0
Amphipoda Streetsia	0	0	0	0	0	0	0	0	0	0.0653595	0	0.0327869	0	0	0	0	0	0	0	0	0	0	0	0	0	0	0	0	0	0	0	0	0	0	0	0	0	0	0	0	0	0	0	0	0	0	0	0	0
Amphipoda Themisto	0	0	0	0	0	0	0	0	0	0	0	0	0	0	0	0	0	0	0	0	0	0	0	0	0	0	0	0	0	0	0	0	0	0	0	0	0	0	0	0	0	0	0	0	0	0	0	0	0
Amphipoda Vibilia	0	0.948276	0	0.371622	0	0.142857	0.5	0.128617	0.01287	0	0	0.00468384	0.0561798	0	0	0.0324675	0	0	0	0	0	0	0	0	0	0	0.571429	0.0643087	0	0	0	0	0	0	0	0	0	0	0	0	0.0510204	0	0	0.0314465	0	0	0	0	0.0689655
Appendicularia	0.396825	0.0862069	0.0734862	0.216109	1.0687	0.142857	0.75	0.610932	0.01287	1.63399	0.487805	0.88993	0.505618	0	8	1.07143	0.0689655	0	0	0.0316456	0	0.0549451	0.333333	0.0666667	0.0925926	0.47619	0.285714	0.321543	0.196078	2.125	120	17.0861	1.13402	4.74074	3.66667	3.32192	1.09091	1.35714	0	1.04027	0.765306	2.77778	1.38889	1.31901	0.693069	2.07921	1.88119	1.55932	0.137931
Bivalvia larvae	0	0.172414	0	0.0675676	0	0.0714286	0.5	0.096463	0.00643501	0.0653595	0	0.0351288	0	0	0	0	0	0	0	0	0	0	0	0	0	0	0	0	0	0	0	0	0	0.148148	0	0.0684932	0.0909091	0.0714286	0	0.0671141	0	0	0	0	0.0990099	0	0	0.0334448	0
Bryozoa larvae	0	0	0	0	0	0.0714286	0.25	0.0643087	0.00643501	0.196078	0	0.100703	0	0.3	0	0.0974026	0	0	0	0	0	0	0	0	0	0	0	0	0	0.125	0	0.0662252	0.103093	0	0	0.0342466	0	0.142857	0	0.0671141	0.102041	0	0	0.0628931	0	0	0.0990099	0.0258287	0
Calanoides acutus (Giesbrecht, 1902)	0	0	0	0	0	0	0.25	0.0321543	0	0	0	0	0	0.6	0	0.194805	0	0	0	0	0	0	0	0	0	0	0	0	0	0.0625	4.5	0.629139	0	0	0	0	0	0	0	0	0.0510204	0.277778	0.138889	0.116177	0	0	0	0	0
Calanus propinquus Brady, 1883	0.396825	0	0.0734862	0.182325	0.458015	1.42857	1	0.96463	0.1287	0.653595	0	0.374707	0	4.6	2.33333	1.72078	0.689655	0.0769231	0	0.348101	0.340909	0.769231	0	0.566667	0.37037	0	0	0.128617	0.490196	0	0	0.165563	0.412371	1.03704	0	0.616438	3.81818	0.0714286	0	1.44295	1.12245	2.91667	1.25	1.54874	0.594059	0.19802	0	0.280142	1.17241
Calanus simillimus Giesbrecht, 1902	0	2.06897	0	0.810811	0	0	0	0	0	0	0	0	0	0	0	0	0	0	0	0	0	0	0	0	0	0	0	0	0	0	0	0	0	0	0	0	0	0	0	0	0	0	0	0	0	0	0	0	0
Calocalanus sp.	0	0	0	0	0.610687	0	15.75	2.28296	0	0.457516	0	0.229508	0	0	0	0	0	0	0	0	0	0	0	0	0	0	0	0	0	0	0	0	0	0	0	0	0	0	0	0	0	0	0	0	0	0	0	0	0
Calocalanus contractus Farran, 1926	0	0	0	0	0	3.14286	0	1.41479	0.28314	10.9804	1.95122	5.87354	0.0561798	11.6	34.6667	7.17532	0.137931	0.769231	0.243902	0.411392	0.113636	0.274725	2	0.4	0.37037	7.14286	7.14286	4.791	0.294118	9.375	105	18.9735	0	16.5926	24	12.6027	0.727273	11.4286	0.785714	5.76414	2.65306	17.3611	48.6111	13.2093	0.19802	10.396	49.901	17.2569	1.10345
Calocalanus pavo (Dana, 1852)	0	1.2069	0	0.472973	0	0	0	0	0	0	0	0	0	0	0	0	0	0	0	0	0	0	0	0	0	0	0	0	0	0	0	0	0	0	0	0	0	0	0	0	0	0	0	0	0	0	0	0	0
Calocalanus styliremis Giesbrecht, 1888	0	1.2931	0	0.506757	0.0763359	1.28571	46.5	6.59164	0.11583	0.784314	1.21951	0.599532	0.505618	14	6.66667	5.48701	0	0.461538	0	0.189873	0	0.10989	0	0.0666667	0.0925926	0.357143	2.85714	0.546624	0.0980392	0.25	2.5	0.496689	0.309278	47.4074	3.33333	22.7055	0.363636	14.2857	0	6.84564	0.561224	194.444	122.222	63.5884	0	0.891089	8.0198	2.44975	0.482759
Calocalanus tenuis Farran, 1926	0.0793651	0	0.0146972	0.036465	0.152672	0.214286	42	5.5627	0.019305	0.588235	2.68293	0.662763	0	0	53.3333	5.19481	0	0	0	0	0	0.164835	0.333333	0.133333	0	0.47619	0.285714	0.289389	0	0.125	0	0.0662252	0	0	0	0	0	0	0	0	0	0	0	0	0	0	0	0	0
Candacia catula (Giesbrecht, 1889)	0	0	0	0	0	0	0	0	0	0	0	0	0	0	0	0	0	0	0	0	0	0	0	0	0.0925926	0	0	0.0321543	0	0	0	0	0	0	0	0	0	0	0	0	0	0.138889	0	0.0314465	0	0	0	0	0
Candacia cheirura Cleve, 1904	0	0	0	0	0	0	0	0	0	0	0	0	0	0	0	0	0	0	0	0	0	0	0	0	0	0	0	0	0	0	0	0	0	0	0	0	0	0	0	0	0	0	0	0	0	0	0	0	0
Candacia maxima Vervoort, 1957	0	0	0	0	0	0	0	0	0	0	0	0	0	0	0	0	0	0	0	0	0	0	0	0	0	0	0	0	0	0	0	0	0	0	0	0	0	0	0	0	0	0	0	0	0	0	0	0	0
Candacia sp.	0	0	0	0	0	0	0	0	0	0	0	0	0	0	0.333333	0.0324675	0	0	0	0	0	0	0	0	0	0	0	0	0	0	0	0	0.103093	0	0	0.0342466	0	0	0	0	0	0	0	0	0	0	0	0	0
Candacia varicans (Giesbrecht, 1893)	0	0	0	0	0	0.0714286	0	0.0321543	0.00643501	0	0	0.00234192	0	0	0	0	0	0	0	0	0	0	0	0	0	0	0	0	0	0	0	0	0	0	0	0	0	0	0	0	0	0	0	0	0	0	0	0	0
Centropages bradyi Wheeler, 1900	0	0	0	0	0	0	0	0	0	0	0	0	0	0	0	0	0	0	0	0	0	0	0	0	0	0.178571	1.42857	0.257235	0	0.125	2.25	0.364238	0	0.296296	0.333333	0.205479	0	0	0	0	0	7.22222	0.416667	1.70073	0	0	0	0	0
Centropages gracilis (Dana, 1849)	0	0	0	0	0	0	0.25	0.0321543	0	0	0	0	0	0.2	0	0.0649351	0	0	0	0	0	0	0	0	0	0	0	0	0	0	0	0	0	0	0	0	0	0	0	0	0	0	0	0	0	0	0	0	0
Centropages violaceus (Claus, 1863)	0	0	0	0	0	0.142857	0	0.0643087	0.01287	0	0	0.00468384	0	0	0	0	0	0	0	0	0	0	0	0	0	0	0	0	0	0	0	0	0	0	0	0	0	0	0	0	0	0	0	0	0	0	0	0	0
Cephalopoda	0	0.0862069	0	0.0337838	0	0.0714286	0.25	0.0643087	0.00643501	0	0	0.00234192	0	0	0	0	0	0	0	0	0	0	0	0	0	0	0	0	0	0	0	0	0	0	0	0	0	0	0	0	0	0	0	0	0	0	0	0	0
Chaetognatha	1.90476	1.72414	0.352734	1.55084	5.41985	6.85714	18	7.68489	0.617761	5.4902	0	2.97892	1.96629	6.2	8.33333	3.96104	3.31034	0.769231	0	1.83544	3.29545	0.43956	0	1.23333	2.40741	1.54762	7.14286	2.47588	3.23529	2.625	27	6.0596	4.74227	4.74074	7.33333	5.27397	5.72727	2.21429	0.214286	3.18888	5.76531	10	9.16667	7.25891	6.53465	0.792079	2.67327	3.22262	1.86207
Chiridius gracilis Farran, 1908	0	0	0	0	0.0763359	0	0	0.0321543	0	0	0	0	0	0	0	0	0	0	0	0	0	0	0	0	0	0	0	0	0	0	0	0	0	0	0	0	0	0	0	0	0	0	0	0	0	0	0	0	0
Chirundina streetsii Giesbrecht, 1895	0	0	0	0	0	0	0	0	0	0	0	0	0	0	0	0	0	0	0	0	0	0	0	0	0	0	0	0	0	0	0	0	0	0	0	0	0	0	0	0	0.153061	0	0	0.0943396	0	0	0	0	0
Cirripedia nauplii	0	0	0	0	0	0	0	0	0	0	0	0	0	0	0	0	0	0	0	0	0	0	0	0	0	0	0	0	0	0	0	0	0	0.0740741	0	0.0342466	0	0	0.0714286	0.0115053	0	0	0	0	0.0990099	0	0	0.0334448	0
Clausocalanus arcuicornis (Dana, 1849)	0	0	0	0	0	0	0	0	0	0	0	0	0	0	0	0	0	0	0	0	0	0	0	0	0.185185	0	0	0.0643087	0	0	0	0	0	0	0	0	0	0	0	0	0	0	0	0	0	0	0	0	0
Clausocalanus brevipes Frost & Fleminger, 1968	5.71429	5.68966	1.0582	4.85521	0.687023	10.7143	52.5	11.865	0.965251	20.3922	1.21951	10.7447	0.842697	10	101.333	13.6039	1.37931	0	0	0.632911	0.113636	0.714286	52	5.66667	0.555556	0.0595238	23.1429	2.82958	2.35294	0.125	129	17.947	10.7216	11.2593	13.5	11.5411	16	13.7143	0.142857	12.372	9.79592	29.1667	183.333	41.4675	11.8812	1.28713	0.19802	4.58161	1.31034
Clausocalanus furcatus (Brady, 1883)	0	0	0	0	0	0	0	0	0	0	0	0	0	0	0	0	0	0	0	0	0	0	0	0	0	0	0	0	0	0	0	0	0	0	0	0	0	0	0	0	0	0	0	0	0	0	0	0	0
Clausocalanus laticeps Farran, 1929	0	0	0	0	0	0	0	0	0	0	0	0	0	0	0	0	0	0	0	0	0	0	0	0	0	0	0	0	0	0	0	0	0	0	0	0	0	0	0	0	0	0	0	0	0	0	0	0	0
Clausocalanus pergens Farran, 1926	1.50794	20.6897	0.279248	8.80094	6.87023	9.85714	444	64.4373	0.888031	35.5556	0.487805	18.2248	0.955056	35.2	373.333	48.3442	20.6897	0	0	9.49367	1.59091	3.79121	5.66667	3.33333	22.2222	2.7381	6.28571	9.90354	8.52941	12	46.5	15.3974	26.3918	123.259	4.33333	66.6438	17.4545	26.2857	4.28571	19.4823	2.85714	116.667	344.444	82.334	22.5743	7.72277	0	10.7249	0
Clausocalanus sp.	0	0	0	0	0	0	1.75	0.22508	0	0	0	0	0	0	0	0	0	0	0	0	0	0	0	0	0	0	0	0	0	0	0	0	0.515464	11.8519	0	5.65068	0.818182	0	0	0.302013	16.3265	227.778	244.444	100.07	0	0	0	0	0
Clytemnestra rostrata	0	0	0	0	0	0	0	0	0	0	0	0	0	0	0	0	0	0	0	0	0	0	0	0	0	0	0	0	0	0	0	0	0	0	0	0	0	0	0	0	0	0	0	0	0	0	0	0	0
Copepoda copepodites	2.38095	37.2414	0.440917	15.6885	10.0763	63.4286	58.5	40.3215	5.71429	26.1438	0.487805	15.26	2.64045	80	149.333	42.0455	27.3103	0.769231	0.243902	12.8797	4.31818	7.91209	4	6.46667	25.5556	5	8.57143	12.5402	25.8824	52.5	78	46.8874	17.3196	156.444	4	78.9041	16.7273	57.1429	0.571429	33.1122	85.7143	83.3333	377.778	131.097	49.901	154.455	20.7921	84.269	39.7241
Copepoda nauplii	0	0	0	0	0	0	0	0	0	0	0	0	0.0561798	0	0	0.0324675	0	0	0	0	0	0	0	0	0.185185	0.0595238	0	0.096463	0.686275	0.0625	3	0.662252	0.103093	0.37037	0.166667	0.239726	0	0	0	0	0	0	0.138889	0.0218379	0	0	0.693069	0.180801	0.137931
Corycaeus furcifer	0	0	0	0	0	0	0	0	0	0	0	0	0.11236	0	0	0.0649351	0.206897	0.0769231	0	0.126582	0	0.10989	0	0.0666667	0.0925926	0	0	0.0321543	0	0	0	0	0	0.0740741	0	0.0342466	0	0	0	0	0	0	0	0	0	0	0	0	0.206897
Corycaeus giesbrechti	0	36.2069	0	14.1892	0	3	1	1.4791	0.27027	18.3007	0	9.27869	0.449438	76.8	19.3333	27.0779	0	0.384615	0	0.158228	0	0.0549451	0	0.0333333	0	0.654762	1.42857	0.514469	0.0980392	0.375	17.25	2.51656	0.103093	7.7037	6.33333	4.89726	0.545455	23.4286	0.0714286	11.2196	9.38776	66.6667	0.833333	21.0115	0	0.693069	19.604	5.39223	0
Corycaeus limbatus	0	0	0	0	0	0	0	0	0	0	0	0	0	0	0	0	0	0	0	0	0	0	0	0	0	0	0	0	0.0980392	0.125	0	0.0993377	0	0	0	0	0	0.0714286	0	0.033557	0	0	0	0	0	0	0	0	0
Corycaeus speciosus Dana, 1849	0.396825	0.344828	0.0734862	0.31746	0.0763359	0.642857	0	0.321543	0.0579151	0.196078	0	0.119438	0	0.2	0	0.0649351	0	0	0	0	0	0	0	0	0	0	0	0	0	0	0	0	0	0	0	0	0	0	0	0	0	0	0	0	0	0	0	0	0
Ctenocalanus citer Heron & Bowman, 1971	0	0	0	0	0	0	0	0	0	0	0	0	0	0	0	0	0	0	0	0	0	0	0	0	0	0	0	0	0	0	0	0	0	0	0	0	0	0	0	0	0	0	0	0	0	0	2.67327	0.697374	0
Ctenocalanus vanus Giesbrecht, 1888	0.31746	11.2069	0.0587889	4.53775	0.381679	30.8571	37.5	18.8746	2.77992	12.549	0.731707	7.40515	0.280899	38.4	3.66667	12.987	0	0	0	0	0	0	0	0	0	0	0	0	0	0	0	0	0.618557	21.3333	0	10.0685	3.81818	48	0	23.9597	40.7143	111.111	0	50.2516	0	0	0	0	11.0345
Decapoda larvae	0	0	0	0	0	0	0.25	0.0321543	0	0	0	0	0	0.1	0	0.0324675	0	0	0	0	0	0	0	0	0	0	0.571429	0.0643087	0	0	0	0	0	0.0740741	0.166667	0.0684932	0.0909091	0	0	0.033557	0	0	0	0	0	0	0	0	0
Echinodermata larvae	0	0	0	0	0	0	0	0	0	0	0	0	0	0	0	0	0	0.0769231	0	0.0316456	0	0	0	0	0	0	0	0	0	0	0	0	0	0	0	0	0	0	0	0	0	0	0	0	0	0	0	0	0
Eucalanus elongatus elongatus (Dana, 1848)	0	0	0	0	0	0	0	0	0	0	0	0	0	0	0	0	0	0	0	0	0	0	0	0	0	0.0595238	0.285714	0.0643087	0	0	0	0	0	0	0	0	0	0	0	0	0	0	0	0	0.29703	0	0.0990099	0.126163	0
Eucalanus hyalinus (Claus, 1866)	0	0	0	0	0	0	0	0	0	0	0	0	0	0	0	0	0	0	0	0	0	0	0	0	0	0	0	0	0	0.0625	0	0.0331126	0	0	0	0	0	0	0	0	0	0	0	0	0	0	0	0	0
Euchaeta acuta Giesbrecht, 1893	0.0793651	0	0.0146972	0.036465	0.229008	2.07143	1	1.15756	0.186615	0.0653595	0	0.100703	0.449438	9.2	1.66667	3.40909	0	0	0	0	0.113636	0.164835	0	0.133333	0	0	0	0	0	0	0	0	0.103093	0	0	0.0342466	0	0	0	0	3.87755	0.694444	0	2.54717	0	0	0	0	0.137931
Euchaeta marina (Prestandrea, 1833)	0.952381	0.948276	0.176367	0.809202	1.67939	8.57143	0.5	4.63023	0.772201	1.63399	0	1.1007	0.449438	20	0	6.75325	3.31034	0.153846	0	1.58228	1.02273	1.42857	0	1.16667	0.462963	0	0	0.160772	2.05882	0.4375	0	0.927152	2.16495	1.18519	0	1.26712	12.3636	1.28571	0	5.16779	11.0204	2.08333	0	7.26415	1.78218	0.39604	0	0.760952	1.37931
Euchirella intermedia	0	0	0	0	0	0.357143	0	0.160772	0.032175	0	0	0.0117096	0	0	0	0	0	0	0	0	0	0	0	0	0	0	0	0	0	0	0	0	0	0	0	0	0	0	0	0	0	0	0	0	0	0	0	0	0
Euchirella rostrata (Claus, 1866)	0	0	0	0	0.0763359	0	0	0.0321543	0	0	0	0	0	0.7	0	0.227273	0.0689655	0	0	0.0316456	0.113636	0	0	0.0333333	0	0	1.14286	0.128617	0	0	0	0	0	0	0	0	0	0	0	0	0.408163	0.833333	0	0.440252	0	0.19802	0	0.0794728	0.758621
Euchirella sp.	0	0	0	0	0	0	0	0	0	0	0	0	0	0	0	0	0	0	0	0	0	0	0	0	0	0	0	0	0	0.0625	0	0.0331126	0	0	0	0	0	0	0	0	0	0	0	0	0	0	0	0	0
Euchirella truncata Esterly, 1911	0	0	0	0	0	0	0	0	0	0	0	0	0	0	0	0	0	0	0	0	0	0	0	0	0	0	0	0	0	0	0	0	0	0	0	0	0	0	0	0	0	0	0	0	0	0	0	0	0
Euphausiacea calyptopis	0.15873	0.172414	0.0293945	0.140498	0.152672	0.142857	5.25	0.803859	0.01287	0.392157	0.243902	0.234192	0	0.9	19.3333	2.17532	0.206897	0	0	0.0949367	0	0.0549451	0	0.0333333	0.0925926	0	0	0.0321543	0	0.5	6	1.0596	0.618557	6.22222	0	3.08219	0.181818	0.642857	0	0.369128	1.12245	3.88889	1.66667	1.83438	0.0990099	2.67327	0.29703	1.18381	0.965517
Euphausiacea furcilia	0.238095	0	0.0440917	0.109395	0.152672	4.78571	65.75	10.6752	0.431145	0.196078	0	0.255269	0	2.8	18	2.66234	1.58621	0	0	0.727848	0	0.164835	0	0.1	0	0.0595238	0	0.0321543	0	0	0.25	0.0331126	0.103093	0.296296	0.666667	0.308219	1.09091	0	0	0.402685	0.0510204	1.25	1.25	0.511006	0.0990099	0.0990099	0	0.0731812	0.206897
Euphausiacea nauplii	0.238095	0.431034	0.0440917	0.278314	0.305344	0.142857	4.25	0.73955	0.01287	0.261438	0	0.135831	0	0.1	8.66667	0.876623	0.62069	0	0.243902	0.316456	0.340909	1.26374	1	0.966667	0.740741	0.595238	0	0.578778	2.15686	2.375	0	1.98675	11.5464	12.4444	0.333333	9.65753	0.545455	0.714286	0	0.536913	1.42857	4.86111	18.75	4.92925	10.396	8.31683	0.19802	6.90122	2
Euphausiacea sp.	0	0	0	0	0	0	0	0	0	0	0	0	0	0.1	0	0.0324675	0	0	0	0	0	0	0	0	0	0	0	0	0	0	0	0	0	0	0	0	0	0	0	0	0	1.94444	0	0.440252	0	0	0	0	0
Farranula rostrata (Claus, 1863)	0	0	0	0	0	0	0	0	0	0	0	0	0	0	0	0	0	0	0	0	0	0	0	0	0	0	0	0	0	0	0	0	0	0	0	0	0	0	0	0	0	0	0	0	0	0	0	0	0
Fish larvae	0	0	0	0	0	0.214286	0.25	0.128617	0.019305	0	0	0.00702576	0.11236	0.6	0.333333	0.292208	0	0.0769231	0	0.0316456	0	0	0	0	0	0	0	0	0.0980392	0.1875	0	0.13245	0	0	0	0	0	0	0	0	0.153061	0.555556	0.138889	0.241964	0	0	0	0	0.0689655
Foraminifera	0.0793651	0.258621	0.0146972	0.137816	0.152672	0.142857	1	0.257235	0.01287	0.718954	0.487805	0.430913	0.280899	1.9	2.33333	1.00649	0.0689655	0	0.487805	0.0949367	0.227273	1.42857	0.333333	0.966667	0.648148	4.28571	5.71429	3.18328	1.27451	6	144	22.6821	0.721649	4.44444	12	4.76027	1.81818	22.8571	3.42857	11.9616	2.85714	20.1389	9.02778	7.74022	11.8812	133.069	54.6535	71.6765	8
Gaetanus miles Giesbrecht, 1888	0	0	0	0	0	0	0	0	0	0	0	0	0	0	0	0	0	0	0	0	0	0	0	0	0	0	0	0	0	0	0	0	0	0	0	0	0	0	0	0	0.0510204	0	0	0.0314465	0	0	0	0	0
Gaetanus minor Farran, 1905	0	0	0	0	0.229008	0	0	0.096463	0	0	0	0	0	0	0	0	0	0	0	0	0.113636	0	0	0.0333333	0	0	0	0	0	0	0	0	0.206186	0	0	0.0684932	0.0909091	0	0	0.033557	0.255102	0	0	0.157233	0	0	0	0	0.137931
Gaetanus robustus Sars G.O., 1905	0	0	0	0	0	0	0	0	0	0	0	0	0	0	0	0	0	0	0	0	0	0	0	0	0	0	0	0	0	0	0	0	0	0	0	0	0	0	0	0	0	0	0	0	0	0	0	0	0
Gaetanus tenuispinus (Sars G.O., 1900)	0	0	0	0	0	0	0	0	0	0	0	0	0	0	0	0	0	0	0	0	0	0	0	0	0	0	0	0	0.0980392	0	0	0.0331126	0	0	0	0	0	0	0	0	0	0	0	0	0	0	0	0	0
Gastropoda larvae	0	0	0	0	0	0.0714286	0	0.0321543	0.00643501	0	0	0.00234192	0	0.1	2.66667	0.292208	0	0	0	0	0	0.164835	1.33333	0.233333	0	0	0.571429	0.0643087	0	0.125	0.25	0.0993377	0	0.444444	1.5	0.513699	0.0909091	0	0	0.033557	0	0.416667	0.138889	0.116177	0	0	0	0	0
Haloptilus longicornis (Claus, 1863)	0.238095	0	0.0440917	0.109395	0.0763359	0.0714286	0	0.0643087	0.00643501	0	0	0.00234192	0.0561798	0	0	0.0324675	0.137931	0	0	0.0632911	0.113636	0	0	0.0333333	0.0925926	0	0	0.0321543	0.294118	0	0	0.0993377	0.206186	0.148148	0	0.136986	1.63636	0	0	0.604027	0.459184	0	0	0.283019	0.39604	0	0	0.133779	0
Haloptilus ocellatus Wolfenden, 1905	0	0	0	0	0	0	0	0	0	0	0	0	0	0	0	0	0	0	0	0	0	0	0	0	0	0	0	0	0	0	0	0	0	0	0	0	0	0	0	0	0	0	0	0	0	0	0	0	0
Haloptilus oxycephalus (Giesbrecht, 1889)	0	0	0	0	0	0	0	0	0	0.130719	0	0.0655738	0.0561798	0	0	0.0324675	0	0	0	0	0	0	0	0	0.0925926	0	0	0.0321543	0	0	0	0	0	0	0	0	0.0909091	0	0	0.033557	0	0	0	0	0	0	0	0	0
Haloptilus spiniceps (Giesbrecht, 1893)	0	0	0	0	0	0	0	0	0	0	0	0	0	0	0	0	0	0	0	0	0	0	0	0	0	0	0	0	0	0	0	0	0	0	0	0	0	0.0714286	0	0.033557	0	0	0	0	0	0	0	0	0
Heterorhabdus compactus	0	0	0	0	0	0	0	0	0	0	0	0	0	0	0	0	0	0	0	0	0	0	0	0	0	0	0	0	0	0	0	0	0	0	0	0	0	0	0	0	0	0	0	0	0	0	0	0	0
Heterorhabdus papilliger	0	0	0	0	0	0	0	0	0	0	0	0	0	0	0	0	0	0	0	0	0	0	0	0	0	0	0	0	0	0	0	0	0	0	0	0	0	0	0	0	0	0	0	0	0	0	0	0	0
Heterorhabdus robustus	0	0.862069	0	0.337838	0	0	0	0	0	0	0	0	0	0	0	0	0	0	0	0	0	0	0	0	0	0	0	0	0	0	0	0	0	0	0	0	0	0.357143	0	0.167785	1.12245	0.833333	0	0.880503	0	0	0	0	0
Heterorhabdus spinifrons (Claus, 1863)	0.396825	0.0862069	0.0734862	0.216109	0.763359	0.642857	0.75	0.707395	0.0579151	0.653595	0	0.348946	0.280899	1.6	0.333333	0.714286	0.482759	0.153846	0	0.28481	1.36364	0.32967	0	0.6	1.2963	0.178571	0	0.546624	1.17647	0.25	0	0.529801	0.721649	0.518519	0	0.479452	1.27273	0	0	0.469799	0	0	0	0	1.68317	0.19802	0	0.648035	0.551724
Heterostylites major (Dahl F., 1894)	0	0.0862069	0	0.0337838	0	0	0	0	0	0	0	0	0	0	0	0	0	0	0	0	0	0	0	0	0	0	0	0	0	0	0	0	0	0	0	0	0	0	0	0	0	0	0	0	0	0	0	0	0
Isopoda	0	0	0	0	0	0.0714286	0.25	0.0643087	0.00643501	0	0	0.00234192	0	0.1	0	0.0324675	0.206897	0	0	0.0949367	0	0	0	0	0	0	0	0	0	0.0625	0	0.0331126	0	0	0	0	0.0909091	0	0	0.033557	0.204082	0	0	0.125786	0	0	0	0	0.206897
Lophothrix latipes (Scott T., 1894)	0	0	0	0	0	0.0714286	0	0.0321543	0.00643501	0	0	0.00234192	0	1.1	0	0.357143	0	0	0	0	0	0	0	0	0	0	0	0	0	0	0	0	0	0	0	0	0	0	0	0	0	0	0	0	0	0	0	0	0
Lubbockia aculeata Giesbrecht, 1891	0	0	0	0	0	0	0	0	0	0	0	0	0	0	0	0	0	0	0	0	0	0	0	0	0	0	0	0	0	0	0	0	0	0	0	0	0	0	0	0	0	0	0	0	0	0	0	0	0
Lubbockia squillimana Claus, 1863	0	0	0	0	0	0	0	0	0	0	0	0	0	0	0	0	0.0689655	0	0	0.0316456	0	0	0	0	0	0	0	0	0	0	0	0	0	0	0	0	0	0	0	0	0	0	0	0	0	0	0	0	0
Lucicutia clausi (Giesbrecht, 1889)	0	0	0	0	0	0	0	0	0	0.130719	0	0.0655738	0.337079	0	0	0.194805	0	0	0	0	0	0	0	0	0	0	0	0	0	0	0	0	0	0	0	0	0	0	0	0	0.153061	0	0	0.0943396	0	0	0	0	0
Lucicutia curta Farran, 1905	0	1.37931	0	0.540541	0	0	0	0	0	0	0	0	0	0	0	0	0	0	0	0	0	0	0	0	0	0	0	0	0	0	0	0	0	0	0	0	0	0	0	0	0	0	0	0	0	0	0	0	0
Lucicutia flavicornis (Claus, 1863)	1.11111	0	0.205761	0.510511	0.916031	4.42857	4.5	2.9582	0.39897	3.13725	0	1.71897	0.786517	2.5	1	1.36364	1.44828	0.0769231	0	0.696203	0.909091	0.549451	0	0.6	1.11111	0.0595238	0	0.418006	0.294118	0	0	0.0993377	1.34021	0.37037	0	0.616438	4.90909	0.142857	0	1.87919	4.08163	1.25	0	2.79874	0.39604	0	0	0.133779	0.551724
Lucicutia lucida Farran, 1908	0	0	0	0	0	0	0	0	0	0	0	0	0	0	0	0	0	0	0	0	0	0	0	0	0	0	0	0	0	0	0	0	0	0	0	0	0	0	0	0	0	0	0	0	0	0	0	0	0
Lucicutia ovalis (Giesbrecht, 1889)	0	0	0	0	0	0.142857	0	0.0643087	0.01287	0.392157	0	0.201405	0.280899	0	0	0.162338	0	0	0	0	0	0	0	0	0	0	0	0	0	0	0	0	0	0	0	0	0	0	0	0	0	0	0	0	0	0	0	0	0
Macrosetella gracilis (Dana, 1847)	0	0	0	0	0	0	0.25	0.0321543	0	0.0653595	0	0.0327869	0	0.4	0	0.12987	0	0	0	0	0	0	0	0	0	0	0	0	0	0	0	0	0	0	0	0	0	0	0	0	0	0	0	0	0	0	0	0	0
Medusae	0.15873	0.948276	0.0293945	0.444552	0.0763359	0	0	0.0321543	0	0	0	0	0	0	0.333333	0.0324675	0.0689655	0	0	0.0316456	0	0	0	0	0	0	0	0	0	0	0.25	0.0331126	0	0	0	0	0	0	0	0	0	0	0	0	0	0.0990099	0	0.0397364	0
Mesocalanus tenuicornis (Dana, 1849)	0.238095	0	0.0440917	0.109395	0.534351	2.5	4.25	1.89711	0.225225	1.11111	0	0.639344	0.505618	12	0.666667	4.25325	0.827586	0.384615	0	0.537975	0	0.32967	0	0.2	0.833333	0.47619	0	0.546624	0.0980392	0.625	0	0.364238	0.206186	6.22222	0.666667	3.08219	4.72727	1.21429	1.78571	2.60307	0	0	0	0	0	0	0	0	0
Metridia gerlachei Giesbrecht, 1902	0	0	0	0	0	0	0	0	0	0	0	0	0	0	0	0	0	0	0	0	0	0	0	0	0	0	0	0	0	0	0	0	0	0	0	0	0	0	0	0	0	0	0	0	0	0	0	0	0
Metridia lucens lucens Boeck, 1865	0	0	0	0	0	0.0714286	0	0.0321543	0.00643501	0	0	0.00234192	0	0.1	0	0.0324675	0	0	0	0	0.227273	1.0989	0	0.733333	0.277778	0.0595238	0	0.128617	0.196078	0	0	0.0662252	0.412371	0	0	0.136986	0	0.0714286	0	0.033557	0.459184	0.972222	0.416667	0.568658	0.19802	0	0	0.0668896	22.069
Microcalanus pusillus Sars G.O., 1903	0	0	0	0	0.381679	0	1.5	0.353698	0	6.27451	0	3.14754	0.505618	1.2	30.6667	3.66883	3.31034	0	0	1.51899	0	3.95604	0	2.4	11.6667	7.14286	0.571429	7.97428	1.37255	5.9375	0	3.60927	20.6186	101.926	0.166667	54.0068	8.36364	22.8571	0	13.8255	45	183.333	522.222	151.356	47.5248	90.297	0	52.2931	5.51724
Microsetella rosea (Dana, 1847)	0.0793651	0	0.0146972	0.036465	0.381679	0.428571	7	1.25402	0.03861	0.326797	0	0.177986	0.280899	0.4	8	1.07143	0.62069	0.0769231	0	0.316456	0.340909	0.274725	0	0.266667	0.462963	0.178571	0	0.257235	0.196078	0.75	0	0.463576	0.412371	2.37037	0.166667	1.26712	0.454545	0.428571	0	0.369128	1.22449	21.5278	14.5833	7.92191	0.49505	0.49505	0.0990099	0.391735	1.17241
Mormonilla minor	0	0	0	0	0	0	0	0	0	0	0	0	0	0	0	0	0	0	0	0	0	0	0	0	0	0	0	0	0	0	0	0	0	0	0	0	0	0	0	0	0	0	0	0	0	0	0	0	0
Mysidacea Echinomysis Illig, 1905	0	0	0	0	0	0	0	0	0	0	0	0	0	0	0	0	0	0	0	0	0	0	0	0	0	0	0	0	0	0	0	0	0	0	0	0	0	0	0	0	0	0	0	0	0	0	0	0	0
Nannocalanus minor (Claus, 1863)	0.873016	0.775862	0.16167	0.705169	0.381679	12	7.5	6.52733	1.08108	6.01307	0.731707	3.5082	2.58427	29.6	18	12.8571	0.482759	0	0	0.221519	0	0	0	0	0.37037	0.178571	0	0.22508	0.0980392	0.0625	0	0.0662252	0.515464	1.7037	1.66667	1.30137	6.90909	0.214286	0	2.65101	2.95918	31.9444	11.8056	10.9128	0.594059	1.88119	0	0.955661	0
Neocalanus gracilis (Dana, 1852)	0	0	0	0	0	0	0	0	0	0	0	0	0	0	0	0	0	0	0	0	0	0	0	0	0	0	0	0	0	0	0	0	0.103093	0	0	0.0342466	0	0	0	0	0	0	0	0	0	0	0	0	0
Nullosetigera helgae (Farran, 1908)	0	0	0	0	0	0	0	0	0	0	0	0	0	0	0	0	0	0	0	0	0	0	0	0	0	0	0	0	0	0	0	0	0	0	0	0	0	0	0	0	0.0510204	0	0	0.0314465	0	0	0	0	0
Oculosetella gracilis (Dana, 1849)	0	0	0	0	0.0763359	0.0714286	0	0.0643087	0.00643501	0	0	0.00234192	0	0.1	0	0.0324675	0	0.0769231	0	0.0316456	0	0.21978	0	0.133333	0	0	1.71429	0.192926	0	0.0625	0.75	0.13245	0	0.222222	0.333333	0.171233	0	0.0714286	0	0.033557	0	0.277778	0.555556	0.150245	0	0	0	0	0
Oikopleura sp.	0	0	0	0	0	0	0	0	0	0	0	0	0	0	0	0	0	0	0	0	0	0	0	0	0	0	0	0	0	0	0	0	0	0	0	0	0	0	0	0	0	0	0	0	0	0	0	0	0
Oithona nana Giesbrecht, 1893	0	1.55172	0	0.608108	0	0	0	0	0	0	0	0	0	0	0	0	0	0	0	0	0	0	0	0	0	0	0	0	0	0	0	0	0	0	0	0	0	0	0	0	0	0	0	0	0	0	0	0	0
Oithona plumifera Baird, 1843	0.714286	0	0.132275	0.328185	1.67939	0.857143	0	1.09325	0.0772201	1.69935	0	0.880562	2.35955	0.1	0	1.3961	3.03448	0.307692	0	1.51899	2.27273	0.384615	0	0.9	2.59259	1.30952	0	1.60772	2.2549	0	0	0.761589	2.37113	0.740741	0	1.13014	9.09091	0	0	3.3557	5.30612	0	0	3.27044	0.792079	0.693069	0.0990099	0.571542	0.344828
Oithona plumifera+similis	0	78.6207	0	30.8108	0	0	0	0	0	0	0	0	0	0	0	0	0	0	0	0	0	0	0	0	0	0	0	0	0	0	0	0	0	0	0	0	0	0	0	0	0	0	0	0	0	0	0	0	0
Oithona similis Claus, 1866	3.33333	0	0.617284	1.53153	34.8092	78.8571	216	77.9421	7.10425	46.0131	3.90244	26.192	21.573	131.2	106.667	65.4545	26.4828	44.3077	0.97561	30.5063	5.45455	29.011	8.33333	20.0333	28.8889	97.1429	150.857	79.4855	40	166.5	1908	354.437	18.9691	303.407	132	173.699	64	210.286	10	124.027	153.469	1200	888.889	506.052	57.0297	465.743	228.119	265.694	123.586
Oithona similis+O. atlantica	0	5.17241	0	2.02703	0	0	0	0	0	0	0	0	0	0	0	0	0	0	0	0	0	0	0	0	0	0	0	0	0	0	0	0	0	0	0	0	0	0	0	0	0	0	0	0	0	0	0	0	0
Oncaea sp.	6.66667	5.94828	1.23457	5.39414	5.26718	13.7143	52.5	15.1447	1.23552	54.3791	0.731707	27.8267	11.7978	78.4	101.333	42.1429	2.89655	0.230769	0.243902	1.4557	2.27273	1.04396	0.666667	1.36667	3.61111	0.178571	0	1.35048	9.11765	2.25	0	4.27152	17.3196	29.6296	0.166667	19.4863	48	52.5714	0	42.4161	98.5714	287.5	161.806	151.29	14.6535	1.58416	0	5.58562	0
Onychocorycaeus giesbrechti (Dahl F., 1894)	0.873016	0	0.16167	0.401115	0	0	0	0	0	0	0	0	0	0	0	0	0	0	0	0	0	0	0	0	0	0	0	0	0	0	0	0	0	0	0	0	0	0	0	0	0	0	0	0	0	0	0	0	0
Ostracoda	5.95238	0.172414	1.10229	2.80245	2.59542	7.71429	4	5.08039	0.694981	20.915	0	10.7447	72.4719	14	6.66667	47.0779	3.72414	0.0769231	0	1.74051	2.5	4.28571	0.333333	3.36667	0.925926	0.238095	0	0.450161	1.27451	1.125	0.25	1.0596	2.06186	4.88889	0	2.94521	32	7.42857	0.0714286	15.3135	17.9592	1.66667	0.416667	11.5121	1.48515	2.17822	0.0990099	1.4017	6.06897
Ova (?)	0.793651	20.6897	0.146972	8.47276	0.458015	4.71429	2.5	2.63666	0.42471	2.87582	1.70732	1.8267	2.92135	1	3	2.30519	1.93103	0.846154	1.21951	1.39241	1.47727	0.824176	0	0.933333	5.83333	4.46429	3.42857	4.82315	1.37255	1.75	6	2.18543	2.57732	11.8519	40	14.5548	1.90909	0.714286	1.07143	1.21285	37.551	6.38889	3.61111	25.159	5.94059	8.91089	2.77228	6.30617	4.55172
Paracalanus parvus parvus (Claus, 1863)	0.714286	0	0.132275	0.328185	1.83206	20.5714	456	68.6817	1.85328	36.6013	1.21951	19.1991	1.34831	20.8	144	21.5584	13.2414	3.23077	2.19512	7.68987	0.227273	1.53846	4	1.4	11.1111	1.13095	37.7143	8.71383	1.66667	9	144	24.404	11.9588	163.556	128	105.89	8	28.5714	0	16.3758	2.65306	21.5278	14.5833	8.80241	0	0	0	0	0
Paraheterorhabdus robustus (Farran, 1908)	0.0793651	0	0.0146972	0.036465	0	0	0	0	0	0	0	0	0	0	0	0	0	0	0	0	0	0	0	0	0	0	0	0	0	0	0	0	0	0	0	0	0	0	0	0	0	0	0	0	0	0	0	0	0
Pareucalanus langae (Fleminger, 1973)	1.5873	0	0.293945	0.729301	0	0	0	0	0	0.130719	0	0.0655738	0	0.3	0	0.0974026	0	0	0	0	0	0	0	0	0	0	0	0	0.0980392	0.0625	0	0.0662252	0	0	0	0	0.0909091	0	0	0.033557	0	0.277778	0	0.0628931	0	0	0	0	0.0689655
Pareuchaeta biloba Farran, 1929	0	0	0	0	0	0	0	0	0	0	0	0	0	0	0	0	0	0	0	0	0	0	0	0	0	0	0	0	0	0	0	0	0	0	0	0	0	0	0	0	0	0	0	0	0	0	0	0	0
Pareuchaeta bisinuata (Sars G.O., 1907)	0	0	0	0	0	0	0	0	0	0	0	0	0	0	0	0	0	0	0	0	0	0	0	0	0	0	0	0	0	0	0	0	0	0	0	0	0	0	0	0	0	0	0	0	0	0	0	0	0
Pareuchaeta gracilis (Sars G.O., 1905)	0	0	0	0	0	0	0	0	0	0	0	0	0	0	0	0	0	0	0	0	0	0	0	0	0	0	0	0	0	0	0	0	0	0	0	0	0	0	0	0	0	0	0	0	0	0	0	0	0
Pareuchaeta pseudotonsa (Fontaine, 1967)	0	0	0	0	0	0	0	0	0	0	0	0	0	0	0	0	0	0	0	0	0	0	0	0	0	0	0	0	0	0	0	0	0	0	0	0	0	0	0	0	0.102041	0	0	0.0628931	0	0	0	0	0
Pareuchaeta sarsi (Farran, 1908)	0	0	0	0	0	0	0	0	0	0	0	0	0	0	0	0	0	0	0	0	0	0	0	0	0	0	0	0	0	0	0	0	0	0	0	0	0	0	0	0	0	0	0	0	0	0	0	0	0
Pareuchaeta sp.	0	0.689655	0	0.27027	0	0	0	0	0	0	0	0	0	0	0	0	0	0	0	0	0	0	0	0	0	0	0	0	0	0	0	0	0	0	0	0	0	0	0	0	0	0	0	0	0	0	0	0	0
Pareuchaeta tonsa (Giesbrecht, 1895)	0	0	0	0	0.0763359	0	0	0.0321543	0	0	0	0	0.0561798	0	0	0.0324675	0	0	0	0	0	0	0	0	0	0	0	0	0	0	0	0	0	0	0	0	0	0	0	0	0	0	0	0	0	0	0	0	0
Phaenna spinifera Claus, 1863	0.238095	0	0.0440917	0.109395	0	0	0	0	0	0	0	0	0	0	0	0	0	0	0	0	0	0	0	0	0	0	0	0	0	0	0	0	0	0	0	0	0	0	0	0	0	0	0	0	0	0	0	0	0
Pleuromamma gracilis Claus, 1863	0.634921	0	0.117578	0.29172	1.37405	30.8571	49.5	20.836	2.77992	1.69935	0	1.86417	0.842697	40	181.333	31.1364	9.51724	0	0	4.36709	9.88636	26.3736	0	18.9	37.7778	0	0.285714	13.1511	23.5294	8.25	0.25	12.351	61.0309	6.81481	0	23.4247	24	5.71429	0	11.5436	66.4286	172.222	30.5556	84.7414	61.7822	0	0	20.8696	45.2414
Pleuromamma quadrungulata (Dahl F., 1893)	0.15873	0	0.0293945	0.0729301	0.610687	0.928571	2	0.932476	0.0836551	0	0	0.030445	0.168539	1.9	2	0.909091	0	0	0	0	0.340909	0	0	0.1	0	0	0	0	0	0	0	0	0	0	0	0	0.363636	0	0	0.134228	0.714286	1.11111	0	0.691824	0	0	0	0	0.482759
Pleuromamma robusta (Dahl F., 1893)	0	0	0	0	0	0	0	0	0	0	0	0	0	0	0	0	0	0	0	0	0	0	0	0	0	0	0	0	0	0	0	0	0	0	0	0	0	0	0	0	0	0	0	0	0	0	0	0	0
Pleuromamma xiphias (Giesbrecht, 1889)	0	2.15517	0	0.844595	0.458015	3	0.75	1.63987	0.27027	0.653595	0	0.42623	0.168539	4	8.33333	2.20779	0.344828	0	0	0.158228	0	2.63736	0	1.6	1.2037	0	0	0.418006	0.686275	0.0625	0	0.264901	1.4433	0.0740741	0	0.513699	4.18182	0.142857	0	1.61074	5.91837	15.9722	0	7.26415	0.0990099	0	0	0.0334448	1.72414
Polychaeta	0.47619	0	0.0881834	0.21879	0.0763359	0.571429	5.75	1.02894	0.0514801	0.196078	0	0.117096	0.11236	2.7	4.33333	1.36364	0.137931	0	0	0.0632911	0	0	0	0	0.185185	0	0	0.0643087	0	0	0	0	0	0	0.166667	0.0342466	0.363636	0	0	0.134228	0	0.277778	0	0.0628931	0	0.19802	0.0990099	0.105302	0
Polychaeta larvae	0	0	0	0	0	0	0	0	0	0	0	0	0	0	0	0	0	0	0	0	0	0	0	0	0	0	0	0	0	0	0	0	0	0	0	0	0	0.214286	0	0.100671	0.357143	0	0.138889	0.241964	0	0	0	0	0
Pteropoda	0	0	0	0	0.381679	1.5	31.5	4.88746	0.135135	1.17647	0.731707	0.737705	0.280899	20.8	133.333	19.9026	0.689655	0	0.243902	0.348101	0	0.164835	3.66667	0.466667	0	0.178571	5.14286	0.675241	1.07843	1.0625	42	6.49007	0.309278	7.7037	32	10.2397	0.818182	1.21429	0.428571	0.941515	1.27551	20.8333	22.2222	8.9972	0.792079	6.23762	20.7921	8.19497	0.965517
Pyrosoma	0	0.862069	0	0.337838	0	0	0	0	0	0	0	0	0	0	0	0	0	0	0	0	0	0	0	0	0	0	0	0	0	0	0	0	0	0	0	0	0	0.142857	0	0.0671141	0	0	0	0	0	0	0	0	0
Radiolaria	0	0	0	0	0	0	0	0	0	0	0	0	0	0	0	0	0	0	0	0	0	0	0	0	0.185185	0.178571	0	0.160772	0	0.25	0.25	0.165563	0.309278	1.18519	0.333333	0.719178	1.27273	0.142857	8	1.8255	0.612245	0.416667	0.416667	0.537212	0.0990099	0.0990099	0	0.0731812	0.206897
Rhincalanus gigas Brady, 1883	0	0	0	0	0	0	0	0	0	0	0	0	0	0	0	0	0	0	0	0	0	0	0	0	0	0	0	0	0	0	0	0	0	0	0	0	0	0	0	0	0	0	0	0	0.0990099	0.0990099	0	0.0731812	0
Rhincalanus nasutus Giesbrecht, 1888	0	0	0	0	0	0	0	0	0	0	0	0	0	0	0.333333	0.0324675	0	0	0	0	0	0	0	0	0	0	0	0	0	0.3125	0	0.165563	0	0.0740741	0.166667	0.0684932	0	0	0	0	0.408163	1.11111	1.38889	0.721523	0	0	0	0	0
Salpa	0	0	0	0	0	0.571429	11.5	1.73633	0.0514801	0.0653595	0	0.0515222	1.34831	0	0	0.779221	0.275862	0	0	0.126582	0	0	1.33333	0.133333	0	0.119048	257.143	29.0032	0	0.0625	0	0.0331126	0	0	0	0	0	0	0	0	0	0.138889	0	0.0314465	0	0.0990099	0	0.0397364	0
Sapphirina	0	0	0	0	0	0	0	0	0	0	0	0	0	0	0	0	0	0	0	0	0	0	0.333333	0.0333333	0	0	2.28571	0.257235	0	0	0	0	0	0	0	0	0	0	0	0	0	0	0	0	0	0	0	0	0
Sapphirina angusta Dana, 1849	0	0	0	0	0	0	3.5	0.450161	0	0	0	0	0	0.5	0	0.162338	0	0	0	0	0	0	0	0	0	0	0	0	0	0	0	0	0	0	0	0	0	0	0	0	0	0	0	0	0	0	0	0	0
Scaphocalanus brevicornis (Sars G.O., 1900)	0	0	0	0	0	0	0	0	0	0	0	0	0.0561798	0	0	0.0324675	0	0	0	0	0	0	0	0	0	0	0	0	0	0	0	0	0	0	0	0	0	0	0	0	2.44898	0	0	1.50943	0.0990099	0	0	0.0334448	0.827586
Scaphocalanus sp.	0	0.0862069	0	0.0337838	0.610687	0.5	0	0.482315	0.045045	0	0	0.0163934	0	0	0	0	0	0	0	0	0.113636	0	0	0.0333333	0	0	0	0	0.686275	0	0	0.231788	0.103093	0	0	0.0342466	0.454545	0.142857	0	0.234899	0	0.277778	0	0.0628931	0	0	0	0	0
Scolecithricella glacialis	0	0.172414	0	0.0675676	0	0	0	0	0	0	0	0	0	0	0	0	0	0	0	0	0	0	0	0	0	0	0	0	0	0	0	0	0	0	0	0	0	0	0	0	0	0	0	0	0	0	0	0	0
Scolecithricella minor (Brady, 1883)	0	0	0	0	0	0.428571	0.5	0.257235	0.03861	0	0	0.0140515	0	1.4	1	0.551948	0	0	0	0	0	0.384615	0	0.233333	0	0.0595238	0	0.0321543	0.588235	0.375	0	0.397351	0.618557	0.296296	0	0.342466	0.727273	0.785714	0	0.637584	1.22449	6.52778	0.138889	2.25454	0.19802	0.19802	0	0.146362	0.482759
Scolecithrix bradyi Giesbrecht, 1888	0	0	0	0	0.229008	0.214286	0	0.192926	0.019305	0	0	0.00702576	0	0	0	0	0	0	0	0	0	0	0	0	0	0	0	0	0	0	0	0	0	0	0	0	0	0	0	0	0	0.138889	0	0.0314465	0	0	0	0	0
Scolecithrix danae (Lubbock, 1856)	0.634921	2.15517	0.117578	1.13631	0	0	0	0	0	0	0	0	0	0	0	0	0	0	0	0	0	0	0	0	0	0	0	0	0	0	0	0	0	0	0	0	0.0909091	0	0	0.033557	0	0	0	0	0	0	0	0	0
Scottocalanus persecans (Giesbrecht, 1895)	0	0	0	0	0	0	0	0	0	0	0	0	0.11236	0	0	0.0649351	0	0	0	0	0	0	0	0	0	0	0	0	0	0	0	0	0	0	0	0	0	0	0	0	0.102041	0	0	0.0628931	0	0	0	0	0
Scottocalanus securifrons (Scott T., 1894)	0	0	0	0	0.152672	0.0714286	0	0.096463	0.00643501	0	0	0.00234192	0	0	0	0	0	0	0	0	0	0.10989	0	0.0666667	0	0	0	0	0	0	0	0	0	0	0	0	0	0	0	0	0	0.138889	0	0.0314465	0	0	0	0	0.137931
Siphonophora	0	0	0	0	0.992366	1.92857	8.5	2.37942	0.173745	3.66013	0.731707	1.99766	1.62921	2.6	4.66667	2.24026	1.31034	0.538462	0	0.822785	0.227273	0.0549451	0	0.1	0.37037	0.178571	0.571429	0.289389	0.686275	0.1875	0.75	0.430464	0.309278	1.48148	1.5	1.09589	4.27273	1.14286	0.0714286	2.1256	3.06122	1.11111	0.138889	2.1602	0.29703	0.594059	0.39604	0.442068	0
Spinocalanus brevicaudatus Brodsky, 1950	0	0	0	0	0	0	0	0	0	0	0	0	0	0	0	0	0	0	0	0	0	0.0549451	0	0.0333333	0	0	0	0	0	0	0	0	0	0	0	0	0	0	0	0	0	0	0	0	0	0	0	0	0
Spinocalanus magnus Wolfenden, 1904	0.15873	0	0.0293945	0.0729301	0	0	0	0	0	0	0	0	0	0	0	0	0	0	0	0	0	0	0	0	0	0	0	0	0	0	0	0	0	0	0	0	0	0	0	0	0	0	0	0	0	0	0	0	0
Subeucalanus longiceps (Matthews, 1925)	0	0	0	0	0	0.0714286	0	0.0321543	0.00643501	0	0	0.00234192	0	0	0	0	0	0	0	0	0	0	0	0	0	0	0	0	0	0	0	0	0	0	0	0	0	0	0	0	0	0	0	0	0	0	0	0	0
Subeucalanus monachus (Giesbrecht, 1888)	0	0	0	0	0	0	0	0	0	0	0	0	0	0	0	0	0	0	0	0	0	0	0	0	0	0	0	0	0	0	0	0	0	0	0	0	0	0	0	0	0	0.138889	0	0.0314465	0	0	0	0	0
Thysanoessa sp.	0	0	0	0	2.29008	8.21429	19.25	7.13826	0.740026	0	0.731707	0.367681	0.0561798	0.5	5.33333	0.714286	0.137931	0.384615	0.243902	0.253165	0.340909	1.59341	18.6667	2.93333	0	0.535714	2	0.514469	0.196078	0	1	0.198675	0.412371	0	3	0.753425	0.363636	0	0.0714286	0.145733	0.204082	0	2.63889	0.540706	0	0	6.93069	1.80801	1.31034
Tomopteris sp.	0	0	0	0	0	0	0	0	0	0	0	0	0.168539	0.2	0	0.162338	0	0	0	0	0	0.0549451	0.333333	0.0666667	0	0	0	0	0	0.0625	0.5	0.0993377	0	0.0740741	0	0.0342466	0.545455	0	0	0.201342	0	0	0	0	0	0	0	0	0
Triconia antarctica ♀ (Heron, 1977)	0	0	0	0	0	0	0	0	0	0	0	0	0	0	0	0	0	0	0	0	0	0	0	0	0	0	0	0	0	0	0	0	0	0	0	0	0	0	0	0	0	0	0	0	0	0	0.0990099	0.0258287	4
Triconia antarctica ♂ (Heron, 1977)	0	0	0	0	0	0	0	0	0	0	0	0	0	0	0	0	0	0	0	0	0	0	0	0	0	0	0	0	0	0	0	0	0	0	0	0	0	0	0	0	0	0	0	0	0	0	0.0990099	0.0258287	1.65517
Undeuchaeta plumosa (Lubbock, 1856)	0	0	0	0	0	0	0	0	0	0	0	0	0	0	0	0	0	0	0	0	0	0	0	0	0	0	0	0	0	0	0	0	0	0	0	0	0	0	0	0	0	0	0	0	0	0	0	0	0
Undinula vulgaris (Dana, 1849)	0.15873	0	0.0293945	0.0729301	0	0	0	0	0	0	0	0	0	0	0	0	0	0	0	0	0	0	0	0	0	0	0	0	0	0	0	0	0	0	0	0	0	0	0	0	0	0	0	0	0	0	0	0	0
Valdiviella minor Wolfenden, 1911	0	0	0	0	0	0	0	0	0	0	0	0	0	0	0	0	0	0	0	0	0	0	0	0	0	0	0	0	0	0	0	0	0	0	0	0	0	0	0	0	0.0510204	0	0	0.0314465	0	0	0	0	0
Salpa	0	0	0	0	0	0	0	0	0	0	0	0	0	0	0	0	0	0	0	0	0	0	0	0	0	0	0	0	0	0	0	0	0	0	0	0	0	0	0	0	0	0	0	0	0	0	0	0	0
Total normilized abundances	41.4286	248.879	7.67196	#DIV/0!	86.6412	363.286	1788.5	#DIV/0!	32.7284	330.131	22.439	#DIV/0!	133.258	708	1788.67	#DIV/0!	131.172	56.3077	12.1951	#DIV/0!	39.8864	94.5604	113.333	#DIV/0!	163.519	137.679	530.857	#DIV/0!	134.902	289.25	2807.5	#DIV/0!	222.68	1090.89	476.667	#DIV/0!	314	563.643	41.5595	#DIV/0!	652.755	2885.97	3225.81	#DIV/0!	311.98	903.335	427.108	#DIV/0!	293.103
Total abundances	522	2887	41.4286	#DIV/0!	1135	5086	7154	#DIV/0!	363.286	5051	92	#DIV/0!	2372	7080	5366	#DIV/0!	1902	732	50	#DIV/0!	351	1721	340	#DIV/0!	1766	2313	1858	#DIV/0!	1376	4628	11230	#DIV/0!	2160	14727	2860	#DIV/0!	3454	7891	199.486	#DIV/0!	12794	20779	16129	#DIV/0!	3151	10840	3331.45	#DIV/0!	4250
Date	04.12.2009	04.12.2009	04.12.2009	04.12.2009	04.12.2009	04.12.2009	04.12.2009	04.12.2009	05.12.2009	05.12.2009	05.12.2009	05.12.2009	05.12.2009	05.12.2009	05.12.2009	05.12.2009	06.12.2009	06.12.2009	06.12.2009	06.12.2009	06.12.2009	06.12.2009	06.12.2009	06.12.2009	07.12.2009	07.12.2009	07.12.2009	07.12.2009	07.12.2009	07.12.2009	07.12.2009	07.12.2009	08.12.2009	08.12.2009	08.12.2009	08.12.2009	08.12.2009	08.12.2009	08.12.2009	08.12.2009	09.12.2009	09.12.2009	09.12.2009	09.12.2009	09.12.2009	09.12.2009	09.12.2009	09.12.2009	10.12.2009
Station	2206	2206	2206	2206	2208	2208	2208	2208	2210	2210	2210	2210	2212	2212	2212	2212	2214	2214	2214	2214	2216	2216	2216	2216	2218	2218	2218	2218	2220	2220	2220	2220	2222	2222	2222	2222	2224	2224	2224	2224	2226	2226	2226	2226	2228	2228	2228	2228	2230
Time	08:15:00	08:30:00	08:40:00	08:40:00	21:00:00	21:15:00	21:35:00	21:35:00	08:30:00	08:45:00	08:55:00	08:55:00	22:25:00	22:15:00	22:57:00	22:57:00	08:25:00	08:35:00	08:45:00	08:45:00	21:00:00	21:15:00	21:25:00	21:25:00	08:25:00	08:40:00	08:55:00	08:55:00	18:15:00	18:35:00	18:50:00	18:50:00	09:20:00	08:45:00	08:20:00	08:20:00	17:50:00	17:40:00	18:00:00	18:00:00	05:05:00	04:50:00	04:55:00	04:55:00	16:15:00	16:25:00	16:35:00	16:35:00	02:50:00
Depth	4507	4507	4507	4507	4670	4670	4670	4670	4472	4472	4472	4472	4830	4830	4830	4830	4959	4959	4959	4959	5053	5053	5053	5053	5172	5172	5172	5172	5139	5139	5139	5139	5130	5130	5130	5130	4668	4668	4668	4668	4639	4639	4639	4639	4559	4559	4559	4559	4730
Layer	160-286	44-160	0-54	0-286	169-300	41-181	0-40	0-40	188-299	40-188	0-41	0-41	122-300	30-125	0-30	0-30	165-310	40-170	0-41	0-41	212-300	30-212	0-30	0-30	202-310	34-202	0-35	0-35	200-302	40-200	0-40	0-40	203-300	60-195	0-60	0-60	190-300	48-190	0-48	0-48	123-319	48-120	0-50	0-50	199-300	78-198	0-78	0-78	155-300
Volume filtered	12.6	11.6	5.4	5.4	13.1	14	4	4	11.1	15.3	4.1	4.1	17.8	10	3	3	14.5	13	4.1	4.1	8.8	18.2	3	3	10.8	16.8	3.5	3.5	10.2	16	4	4	9.7	13.5	6	6	11	14	4.8	4.8	19.6	7.2	5	5	10.1	12	7.8	7.8	14.5
Temperature Av	16.61	17.9	18.79	18.79	15.11	17.18	19.26	19.26	16.12	18	18.7	18.7	16.39	18.09	18.65	18.65	13.54	16.15	18.44	18.44	11.69	14.29	17.37	17.37	9.5	11.85	15.75	15.75	10.13	12.73	16.23	16.23	12.3	14.55	16.56	16.56	16.09	16.89	16.98	16.98	14.46	16.7	16.79	16.79	10.78	13.31	15.9	15.9	10.22
Temperature Surface	18.81	18.81	18.81	18.81	19.28	19.28	19.28	19.28	18.7	18.7	18.7	18.7	18.65	18.65	18.65	18.65	18.45	18.45	18.45	18.45	17.39	17.39	17.39	17.39	15.75	15.75	15.75	15.75	16.33	16.33	16.33	16.33	16.56	16.56	16.56	16.56	17.09	17.09	17.09	17.09	16.87	16.87	16.87	16.87	16.17	16.17	16.17	16.17	16.04
Temperature 300 m	15.2	15.2	15.2	15.2	13.57	13.57	13.57	13.57	15.29	15.29	15.29	15.29	14.81	14.81	14.81	14.81	12.47	12.47	12.47	12.47	11.42	11.42	11.42	11.42	8.85	8.85	8.85	8.85	9.25	9.25	9.25	9.25	11.34	11.34	11.34	11.34	14.99	14.99	14.99	14.99	13.15	13.15	13.15	13.15	9.86	9.86	9.86	9.86	9.4
Salinity Av	35.54	35.54	35.54	35.54	35.4	35.53	35.58	35.58	35.5	35.59	35.62	35.62	35.53	35.6	35.62	35.62	35.22	35.5	35.61	35.61	34.95	35.29	35.59	35.59	34.68	34.87	35.2	35.2	34.8	35.07	35.44	35.44	35.04	35.28	35.57	35.57	35.54	35.6	35.6	35.6	35.33	35.59	35.6	35.6	34.88	35.16	35.46	35.46	34.8
Salinity Surface	35.62	35.62	35.62	35.62	35.58	35.58	35.58	35.58	35.62	35.62	35.62	35.62	35.62	35.62	35.62	35.62	35.61	35.61	35.61	35.61	35.6	35.6	35.6	35.6	35.2	35.2	35.2	35.2	35.44	35.44	35.44	35.44	35.57	35.57	35.57	35.57	35.6	35.6	35.6	35.6	35.6	35.6	35.6	35.6	35.46	35.46	35.46	35.46	35.43
Salinity 300 m	35.43	35.43	35.43	35.43	35.18	35.18	35.18	35.18	35.44	35.44	35.44	35.44	35.4	35.4	35.4	35.4	35.1	35.1	35.1	35.1	35	35	35	35	34.6	34.6	34.6	34.6	34.7	34.7	34.7	34.7	34.89	34.89	34.89	34.89	35.41	35.41	35.41	35.41	35.19	35.19	35.19	35.19	34.79	34.79	34.79	34.79	34.73
Latitude, S	34.4365	34.4365	34.4365	34.4365	35.02	35.02	35.02	35.02	35.6248	35.6248	35.6248	35.6248	36.239	36.239	36.239	36.239	36.8322	36.8322	36.8322	36.8322	37.4183	37.4183	37.4183	37.4183	37.9893	37.9893	37.9893	37.9893	38.5898	38.5898	38.5898	38.5898	39.1843	39.1843	39.1843	39.1843	39.6823	39.6823	39.6823	39.6823	40.3775	40.3775	40.3775	40.3775	40.9778	40.9778	40.9778	40.9778	41.5328
Longitude, E	14.4093	14.4093	14.4093	14.4093	14.0642	14.0642	14.0642	14.0642	13.6818	13.6818	13.6818	13.6818	13.308	13.308	13.308	13.308	12.9385	12.9385	12.9385	12.9385	12.5513	12.5513	12.5513	12.5513	12.1565	12.1565	12.1565	12.1565	11.7487	11.7487	11.7487	11.7487	11.3302	11.3302	11.3302	11.3302	10.9302	10.9302	10.9302	10.9302	10.532	10.532	10.532	10.532	10.0573	10.0573	10.0573	10.0573	9.6432
Light conditions	D	D	D	D	S	S	S	S	D	D	D	D	N	N	N	N	D	D	D	D	S	S	S	S	D	D	D	D	D	D	D	D	D	D	D	D	D	D	D	D	S	S	S	S	D	D	D	D	N
10S	0.339204	0.339204	0.339204	0.339204	0.329714	0.329714	0.329714	0.329714	0.324902	0.324902	0.324902	0.324902	0.336162	0.336162	0.336162	0.336162	0.332075	0.332075	0.332075	0.332075	0.313152	0.313152	0.313152	0.313152	0.296603	0.296603	0.296603	0.296603	0.293287	0.293287	0.293287	0.293287	0.272812	0.272812	0.272812	0.272812	0.251796	0.251796	0.251796	0.251796	0.254595	0.254595	0.254595	0.254595	0.265559	0.265559	0.265559	0.265559	0.268344
11S	0.304788	0.304788	0.304788	0.304788	0.333195	0.333195	0.333195	0.333195	0.393015	0.393015	0.393015	0.393015	0.390487	0.390487	0.390487	0.390487	0.342623	0.342623	0.342623	0.342623	0.321509	0.321509	0.321509	0.321509	0.339582	0.339582	0.339582	0.339582	0.351644	0.351644	0.351644	0.351644	0.372144	0.372144	0.372144	0.372144	0.390853	0.390853	0.390853	0.390853	0.406448	0.406448	0.406448	0.406448	0.36091	0.36091	0.36091	0.36091	0.365122
12S	0.19421	0.19421	0.19421	0.19421	0.206422	0.206422	0.206422	0.206422	0.191996	0.191996	0.191996	0.191996	0.177014	0.177014	0.177014	0.177014	0.21406	0.21406	0.21406	0.21406	0.303518	0.303518	0.303518	0.303518	0.38951	0.38951	0.38951	0.38951	0.428409	0.428409	0.428409	0.428409	0.424315	0.424315	0.424315	0.424315	0.403351	0.403351	0.403351	0.403351	0.402265	0.402265	0.402265	0.402265	0.361892	0.361892	0.361892	0.361892	0.331829
Q4S	0.838202	0.838202	0.838202	0.838202	0.869331	0.869331	0.869331	0.869331	0.909913	0.909913	0.909913	0.909913	0.903663	0.903663	0.903663	0.903663	0.888758	0.888758	0.888758	0.888758	0.938179	0.938179	0.938179	0.938179	1.0257	1.0257	1.0257	1.0257	1.07334	1.07334	1.07334	1.07334	1.06927	1.06927	1.06927	1.06927	1.046	1.046	1.046	1.046	1.06331	1.06331	1.06331	1.06331	0.988361	0.988361	0.988361	0.988361	0.965295
10L	0.682847	0.682847	0.682847	0.682847	0.502769	0.502769	0.502769	0.502769	0.332584	0.332584	0.332584	0.332584	0.330853	0.330853	0.330853	0.330853	0.340843	0.340843	0.340843	0.340843	0.350599	0.350599	0.350599	0.350599	0.348743	0.348743	0.348743	0.348743	0.324049	0.324049	0.324049	0.324049	0.28628	0.28628	0.28628	0.28628	0.262219	0.262219	0.262219	0.262219	0.248569	0.248569	0.248569	0.248569	0.255078	0.255078	0.255078	0.255078	0.279805
11L	0.606046	0.606046	0.606046	0.606046	0.45787	0.45787	0.45787	0.45787	0.396252	0.396252	0.396252	0.396252	0.39566	0.39566	0.39566	0.39566	0.378567	0.378567	0.378567	0.378567	0.369087	0.369087	0.369087	0.369087	0.362456	0.362456	0.362456	0.362456	0.362139	0.362139	0.362139	0.362139	0.368093	0.368093	0.368093	0.368093	0.38552	0.38552	0.38552	0.38552	0.413025	0.413025	0.413025	0.413025	0.406584	0.406584	0.406584	0.406584	0.382256
12L	0.416787	0.416787	0.416787	0.416787	0.286098	0.286098	0.286098	0.286098	0.226889	0.226889	0.226889	0.226889	0.218029	0.218029	0.218029	0.218029	0.234217	0.234217	0.234217	0.234217	0.283286	0.283286	0.283286	0.283286	0.333565	0.333565	0.333565	0.333565	0.362168	0.362168	0.362168	0.362168	0.367388	0.367388	0.367388	0.367388	0.361754	0.361754	0.361754	0.361754	0.362392	0.362392	0.362392	0.362392	0.342722	0.342722	0.342722	0.342722	0.32558
Q4L	0.56856	0.56856	0.56856	0.56856	0.415579	0.415579	0.415579	0.415579	0.318575	0.318575	0.318575	0.318575	0.314847	0.314847	0.314847	0.314847	0.317876	0.317876	0.317876	0.317876	0.334324	0.334324	0.334324	0.334324	0.348255	0.348255	0.348255	0.348255	0.349452	0.349452	0.349452	0.349452	0.340587	0.340587	0.340587	0.340587	0.336498	0.336498	0.336498	0.336498	0.341329	0.341329	0.341329	0.341329	0.334795	0.334795	0.334795	0.334795	0.329214
Date	04.12.2009	04.12.2009	04.12.2009	04.12.2009	04.12.2009	04.12.2009	04.12.2009	04.12.2009	05.12.2009	05.12.2009	05.12.2009	05.12.2009	05.12.2009	05.12.2009	05.12.2009	05.12.2009	06.12.2009	06.12.2009	06.12.2009	06.12.2009	06.12.2009	06.12.2009	06.12.2009	06.12.2009	07.12.2009	07.12.2009	07.12.2009	07.12.2009	07.12.2009	07.12.2009	07.12.2009	07.12.2009	08.12.2009	08.12.2009	08.12.2009	08.12.2009	08.12.2009	08.12.2009	08.12.2009	08.12.2009	09.12.2009	09.12.2009	09.12.2009	09.12.2009	09.12.2009	09.12.2009	09.12.2009	09.12.2009	10.12.2009
Station	2206	2206	2206	2206	2208	2208	2208	2208	2210	2210	2210	2210	2212	2212	2212	2212	2214	2214	2214	2214	2216	2216	2216	2216	2218	2218	2218	2218	2220	2220	2220	2220	2222	2222	2222	2222	2224	2224	2224	2224	2226	2226	2226	2226	2228	2228	2228	2228	2230
Time	08:15:00	08:30:00	08:40:00	08:40:00	21:00:00	21:15:00	21:35:00	21:35:00	08:30:00	08:45:00	08:55:00	08:55:00	22:25:00	22:15:00	22:57:00	22:57:00	08:25:00	08:35:00	08:45:00	08:45:00	21:00:00	21:15:00	21:25:00	21:25:00	08:25:00	08:40:00	08:55:00	08:55:00	18:15:00	18:35:00	18:50:00	18:50:00	09:20:00	08:45:00	08:20:00	08:20:00	17:50:00	17:40:00	18:00:00	18:00:00	05:05:00	04:50:00	04:55:00	04:55:00	16:15:00	16:25:00	16:35:00	16:35:00	02:50:00
Depth	4507	4507	4507	4507	4670	4670	4670	4670	4472	4472	4472	4472	4830	4830	4830	4830	4959	4959	4959	4959	5053	5053	5053	5053	5172	5172	5172	5172	5139	5139	5139	5139	5130	5130	5130	5130	4668	4668	4668	4668	4639	4639	4639	4639	4559	4559	4559	4559	4730
Layer	160-286	44-160	0-54	0-286	169-300	41-181	0-40	0-40	188-299	40-188	0-41	0-41	122-300	30-125	0-30	0-30	165-310	40-170	0-41	0-41	212-300	30-212	0-30	0-30	202-310	34-202	0-35	0-35	200-302	40-200	0-40	0-40	203-300	60-195	0-60	0-60	190-300	48-190	0-48	0-48	123-319	48-120	0-50	0-50	199-300	78-198	0-78	0-78	155-300
Volume filtered	12.6	11.6	5.4	5.4	13.1	14	4	4	11.1	15.3	4.1	4.1	17.8	10	3	3	14.5	13	4.1	4.1	8.8	18.2	3	3	10.8	16.8	3.5	3.5	10.2	16	4	4	9.7	13.5	6	6	11	14	4.8	4.8	19.6	7.2	5	5	10.1	12	7.8	7.8	14.5
[truncated: 124 more columns]

## Sheet: Layers 1-2-3
Layer	Station	Hydro Zone	Temperature Av	Temperature Surface	Temperature 300 m	Salinity Av	Salinity Surface	Salinity 300 m	Latitude, S	Longitude, E	Light conditions	10S	11S	12S	Q4S	10L	11L	12L	Q4L		Acartia longiremis (Lilljeborg, 1853)	Aegistus dubius	Aetideopsis carinata Bradford, 1969	Aetideopsis rostrata Sars G.O., 1903	Aetideus acutus Farran, 1929	Aetideus armatus (Boeck, 1872)	Aetideus australis (Vervoort, 1957)	Aetideus giesbrechti Cleve, 1904	Amphipoda	Amphipoda Cyphocaris	Amphipoda Eupronoe	Amphipoda Hyperia	Amphipoda larvae	Amphipoda Phronima	Amphipoda Rhabdosoma	Amphipoda Scina	Amphipoda Streetsia	Amphipoda Themisto	Amphipoda Vibilia	Appendicularia	Bivalvia larvae	Bryozoa larvae	Calanoides acutus (Giesbrecht, 1902)	Calanus propinquus Brady, 1883	Calanus simillimus Giesbrecht, 1902	Calocalanus sp.	Calocalanus contractus Farran, 1926	Calocalanus pavo (Dana, 1852)	Calocalanus styliremis Giesbrecht, 1888
1	2206	1	18.79	18.81	15.2	35.54	35.62	35.43	34.4365	14.4093	2	0.339204	0.304788	0.19421	0.838202	0.682847	0.606046	0.416787	0.56856		0	0	0	0	0	0	0	0.0440917	0	0	0	0	0	0.0146972	0	0	0	0	0	0.0734862	0	0	0	0.0734862	0	0	0	0	0
1	2208	1	19.26	19.28	13.57	35.58	35.58	35.18	35.02	14.0642	1	0.329714	0.333195	0.206422	0.869331	0.502769	0.45787	0.286098	0.415579		97.5	0	0	0	0	0	0	0	0	0	0	0	0.25	1.5	0	0	0	0	0.5	0.75	0.5	0.25	0.25	1	0	15.75	0	0	46.5
1	2210	1	18.7	18.7	15.29	35.62	35.62	35.44	35.6248	13.6818	2	0.324902	0.393015	0.191996	0.909913	0.332584	0.396252	0.226889	0.318575		1.95122	0	0	0	0	0	0	0	0	0	0	0	0	0	0	0	0	0	0	0.487805	0	0	0	0	0	0	1.95122	0	1.21951
1	2212	1	18.65	18.65	14.81	35.62	35.62	35.4	36.239	13.308	0	0.336162	0.390487	0.177014	0.903663	0.330853	0.39566	0.218029	0.314847		213.333	0	0	0	0	0	0	0	0	0	0	0.333333	0	0	0	0	0	0	0	8	0	0	0	2.33333	0	0	34.6667	0	6.66667
1	2214	1	18.44	18.45	12.47	35.61	35.61	35.1	36.8322	12.9385	2	0.332075	0.342623	0.21406	0.888758	0.340843	0.378567	0.234217	0.317876		5.85366	0	0	0	0	0	0	0	0	0	0	0	0	0	0	0	0	0	0	0	0	0	0	0	0	0	0.243902	0	0
1	2216	1	17.37	17.39	11.42	35.59	35.6	35	37.4183	12.5513	1	0.313152	0.321509	0.303518	0.938179	0.350599	0.369087	0.283286	0.334324		8.33333	0	0	0	0	0	0	0	0	0	0	0	0	0.333333	0	0	0	0	0	0.333333	0	0	0	0	0	0	2	0	0
1	2218	1	15.75	15.75	8.85	35.2	35.2	34.6	37.9893	12.1565	2	0.296603	0.339582	0.38951	1.0257	0.348743	0.362456	0.333565	0.348255		1.71429	0	0	0	0	0	0	0	0	0	0	0	0	0	0	0	0	0	0.571429	0.285714	0	0	0	0	0	0	7.14286	0	2.85714
1	2220	1	16.23	16.33	9.25	35.44	35.44	34.7	38.5898	11.7487	2	0.293287	0.351644	0.428409	1.07334	0.324049	0.362139	0.362168	0.349452		18	0	0	0	0	0	0	0	0	0	0	0	0	0	0	0	0	0	0	120	0	0	4.5	0	0	0	105	0	2.5
1	2222	1	16.56	16.56	11.34	35.57	35.57	34.89	39.1843	11.3302	2	0.272812	0.372144	0.424315	1.06927	0.28628	0.368093	0.367388	0.340587		54	0	0	0	0	0	0	0	0	0	0	0.666667	0	0	0	0	0	0	0	3.66667	0	0	0	0	0	0	24	0	3.33333
1	2224	1	16.98	17.09	14.99	35.6	35.6	35.41	39.6823	10.9302	2	0.251796	0.390853	0.403351	1.046	0.262219	0.38552	0.361754	0.336498		10.4167	0	0	0	0	0	0	0	0	0	0	0.0714286	0	0	0	0	0	0	0	0	0	0	0	0	0	0	0.785714	0	0
1	2226	1	16.79	16.87	13.15	35.6	35.6	35.19	40.3775	10.532	1	0.254595	0.406448	0.402265	1.06331	0.248569	0.413025	0.362392	0.341329		184	0	0	0	0	0	0	0	0	0	0	0.138889	0	0	0	0	0	0	0	1.38889	0	0	0.138889	1.25	0	0	48.6111	0	122.222
1	2228	1	15.9	16.17	9.86	35.46	35.46	34.79	40.9778	10.0573	2	0.265559	0.36091	0.361892	0.988361	0.255078	0.406584	0.342722	0.334795		5.12821	0.39604	0	0	0	0	0	0	0	0	0	0.19802	0	0	0	0	0	0	0	1.88119	0	0.0990099	0	0	0	0	49.901	0	8.0198
1	2230	2	16	16.04	9.4	35.45	35.43	34.73	41.5328	9.6432	0	0.268344	0.365122	0.331829	0.965295	0.279805	0.382256	0.32558	0.329214		28.4444	0.666667	0	0	0	0	0	0	0	0	0	0	0	0	0	0	0	0	0	17.7778	0	0	1.11111	1.77778	0	0	92.4444	0	0
1	2232	2	10.4	11.67	7.22	34.43	34.47	34.41	42.11	9.1905	2	0.274894	0.378159	0.334374	0.987427	0.298919	0.361494	0.307003	0.322472		0	0	0	0	0	0	0	0	0	0	0	1.16667	0	0	0	0	0	0	0	54.1667	0	0	0	0.333333	0	0	58.6667	0	0
1	2234	2	10.46	11.48	6.79	34.38	34.39	34.37	42.6912	8.7402	0	0.318139	0.346154	0.291943	0.956236	0.301607	0.343966	0.288362	0.311312		0	0	0	0	0	0	0	0	0	0	0	3.2	0	0	0	0	0	0	0	592	0	0	0	39	0.8	0.6	20	0	0
1	2236	2	9.92	11	7.61	34.38	34.4	34.43	43.2668	8.2662	2	0.300863	0.305001	0.252769	0.858633	0.300648	0.316247	0.271787	0.296227		0	0	0	0	0	0	0	0	0	0	0	0.163934	0	0	0	0	0	0	0	3.11475	0	0	0	0	0	0	2.62295	0	0
1	2238	3	10.26	10.72	7.18	34.49	34.51	34.42	43.8445	7.7982	0	0.313987	0.284463	0.244399	0.842849	0.291072	0.27958	0.283203	0.284618		0	0	0	0	0	0	0	0	0	0	0	4.2623	0	0	0	0	0	0	0	45.9016	0	0	0	249.18	0	0	57.377	0	0
1	2240	3	8.7	9.51	5.18	34.26	34.27	34.22	44.4175	7.326	2	0.310208	0.262123	0.35158	0.923911	0.281902	0.254952	0.302912	0.279922		0	0	0	0	0	0.123457	0	0	0	0	0	0.740741	0	0	0	0	0	0	0	1669.14	0	0	0	19.1358	58.0247	0	1.7284	0	0
1	2242	4	7.46	7.63	4	33.86	33.84	34.14	44.9787	6.8065	0	0.274947	0.258623	0.426348	0.959918	0.26232	0.24935	0.326332	0.279334		0	0	0	0	0	0	0	0	0	0	0	5	0	0	0	0	0	0	0	128	0	0	1.2	0.2	20	0	0	0	0
1	2244	4	6.81	7.16	3.66	33.8	33.8	34.12	45.6285	6.1333	2	0.215755	0.243366	0.378855	0.837976	0.228123	0.233776	0.342435	0.268111		0	0	0	0	0	0	0	0	0	0	0	7.4	0	0	0	0	0	0	0	67.2	0	0	2.6	0	16	0	0	0	0
1	2246	4	7.14	7.4	3.44	33.74	33.77	34.11	46.0973	5.7627	0	0.200167	0.206945	0.350063	0.757175	0.206353	0.221844	0.328748	0.252315		0	0	0	0	0	0	0	0	0	0	0	5.25	0	0	0	0	0	0	0	328	0	0	0	0	14.75	0	0	0	0
1	2247	4	6.73	7	3.66	33.74	33.77	34.12	46.3857	5.5047	1	0.193931	0.191607	0.346347	0.731885	0.198516	0.212112	0.320173	0.2436		0	0	0	0	0	0	0	0	0	0	0	4.16667	0	0	0	0	0	0	0	280	0	0	0.5	0	88.3333	0	0	0	0
1	2249	4	6.81	7.2	3.77	33.84	33.83	34.12	46.9277	4.97	2	0.185835	0.179176	0.311946	0.676957	0.19388	0.203421	0.306689	0.234663		0	0	0	0	0	0	0	0	0	0	0	2.06897	0	0	0	0	0	0	0	20.6897	0	0	2.75862	0	12.7586	0	0	0	0
1	2251	4	7.1	7.09	3.68	33.8	33.8	34.12	47.4983	4.422	1	0.190792	0.192447	0.292075	0.675314	0.199685	0.206484	0.279501	0.228557		0	0	0	0	0	0	0	0	0	0	0	0	0	3	0	0	0	0	0	284	0	0	0.5	0	6	0	0	0	0
1	2253	4	6.75	6.9	3.65	33.77	33.78	34.11	48.0575	3.996	2	0.205953	0.207589	0.258295	0.671837	0.221505	0.231312	0.278003	0.243607		0	0	0	0	0	0	0	0	0	0	0	0	0	1.38889	0	0	0	0	0	2.5	0	0	0.972222	0	23.3333	0	0	0	0
1	2255	5	6.06	6.07	3.02	33.76	33.78	34.12	48.5278	3.3028	2	0.243289	0.25495	0.261278	0.759517	0.246792	0.259978	0.295162	0.267311		0	0	0	0	0	0	0	0	0	0	0	0	0	0.16129	0	0	0	0	0	1.12903	0	0	0	0	0	0	0	0	0
1	2257	5	4.91	5.12	2.42	33.79	33.79	34.16	49.1713	2.6988	0	0.301861	0.312211	0.329356	0.943428	0.287874	0.320756	0.357259	0.321963		0	0	0	0	0	0	0	0	0	0	0	0	0	0	0	0	0	0	0	1	0	0	0	0	0.5	0	0	0	0
1	2259	5	5.02	5.03	2.35	33.79	33.79	34.17	49.6893	2.0833	2	0.327668	0.33779	0.380892	1.04635	0.309779	0.358142	0.417213	0.361711		0	0	0	0	0	0	0	0	0	0	0	0.777778	0	0	0	0	0	0	0	21.1111	0	0	0	0	0.888889	0	0	0	0
1	2261	5	4.95	5	2.6	33.79	33.78	34.13	50.2323	1.4103	0	0.336132	0.418804	0.437051	1.19199	0.322461	0.379327	0.464823	0.38887		0	0	0	0	0	0	0	0	0	0	0	0	0	1.7	0	0	0	0	0	21	0	0	0.1	0	53	0	0	0	0
1	2263	6	4.02	4.25	2.21	33.81	33.81	34.25	50.7673	0.8265	2	0.342936	0.422813	0.439515	1.20526	0.318344	0.370615	0.459215	0.382725		0	0	0	0	0	0	0	0	0	0	0	0.217391	0	0	0	0	0	0	0	21.1957	0	0	2.6087	0	63.0435	0	0	0	0
1	2266	6	2.87	2.87	1.88	33.71	33.71	34.44	51.6121	0.0022	2	0.328496	0.333954	0.341835	1.00428	0.274965	0.312815	0.412138	0.333306		0	0	0	0	0	0	0	0.0118357	0	0	0	0	0	0	0	0	0	0	0	0	0	0	0.355072	0	0	0	0	0	0
1	2268	6	2.91	2.9	1.94	33.73	33.74	34.47	52.2738	-0.0035	2	0.241795	0.25828	0.339747	0.839822	0.242411	0.288121	0.410098	0.313543		0	0	0	0	0	0	0	0	0	0	0	1	0	0	0	0	0	0	0	3.625	0	0	13.5	1	14.5	0	0	0	0
1	2270	6	0.88	0.92	1.6	33.77	33.77	34.58	52.9303	0.1833	0	0.205089	0.292813	0.391623	0.889525	0.211941	0.28628	0.405341	0.301187		0	0	0	0	0	0	0	0	5.22222	0	0	1.33333	0	0	0	0	0	0	0	0	0	0	1.77778	4.11111	3	0	0	0	0
1	2272	7	1.25	1.29	1.61	33.74	33.75	34.58	53.5931	0.2667	2	0.199489	0.332301	0.380068	0.911858	0.215163	0.316798	0.397581	0.309847		0	0	0	0	0	0	0	0	0	0	0	1.5	0	0	0	0	0	0	0	50	0	0	2.75	7	4.125	0	0	0	0
1	2273	7	1.31	1.19	1.63	33.77	33.77	34.59	53.8925	0.0015	2	0.206167	0.334536	0.362735	0.903438	0.218494	0.32753	0.388488	0.311504		0	0	0	0	0	0	0	0	0	0	0	13.2632	0	0	0	0	0	0	0	0.315789	0	0	8.84211	9.26316	23.5789	0	0	0	0
1	2274	7	1.01	1.09	1.63	33.77	33.77	34.59	54.2507	-0.0027	2	0.214795	0.340452	0.344586	0.899833	0.22506	0.332617	0.357296	0.304991		0	0	0	0	0	0	0	0	0	0	0	3.58974	0	0	0	0	0	0	0	6.41026	0	0	17.9487	0.769231	102.564	0	0	0	0
1	2275	7	0.43	0.58	1.28	33.81	33.81	34.51	54.5837	-0.0095	1	0.21994	0.338875	0.321379	0.880194	0.227361	0.332273	0.337191	0.298942		0	0	0	0.125	0	0	0	0	0	0	0	2.875	0	0	0	0	0	0	0	21	0	0	0.5	4.625	14.375	0	0	0	0
1	2277	7	0.23	0.37	1.81	33.82	33.81	34.56	55.2412	0.003	1	0.213673	0.318484	0.279612	0.811769	0.220817	0.327453	0.302775	0.283682		0	0	0	0	0	0	0	0	0	0	0	0.375	0	0	0	0	0	0	0	8	0	0	1.125	1	4.125	0	0	0	0
1	2278	8	0.2	0.3	1.5	33.88	33.89	34.55	55.5677	0.0022	2	0.204518	0.315734	0.280917	0.801169	0.211703	0.32137	0.280533	0.271202		0	0	0	0	0	0	0	0	0	0	0	0.375	0	0	0	0	0	0	0	4.125	0	0	2	0.875	2.875	0	0	0	0
1	2279	8	0.1	0.3	1.45	33.93	33.91	34.59	55.8997	0.0013	2	0.193583	0.313545	0.278399	0.785527	0.204613	0.315773	0.269889	0.263425		0	0	0	0	0	0	0	0	0	0	0	0	0	0	0	0	0	0	0	6.66667	0	0	0	0.333333	0.777778	0	0	0	0
1	2280	9	0.16	0.29	0.5	34.09	34.04	34.57	56.2222	0.0023	1	0.188629	0.313314	0.267229	0.769172	0.199098	0.314115	0.270152	0.261122		0	0	0	0	0	0	0	0	0	0	0	0	0	0	0	0	0	0.31746	0	2.69841	0	0	0.31746	1.74603	0.952381	0	0	0	0
1	2281	9	0.1	0.2	0.83	34.14	34.14	34.65	56.5618	0.0023	0	0.193664	0.313352	0.262674	0.76969	0.197324	0.31524	0.271914	0.261493		0	0	0	0	0	0	0	0	0	0	0	0	0	0	0	0	0	0.142857	0	1.28571	0	0	0	13.2857	0.857143	0	0	0	0
1	2282	9	0.01	0.02	0.59	34.19	34.18	34.64	56.8968	-0.0098	2	0.207454	0.338328	0.262639	0.808421	0.198146	0.306117	0.280217	0.261493		0	0	0	0	0	0	0	0	0	0	0	0	0	0	0	0	0	0	0	2.6	0	0	0	1.6	1.4	0	0	0	0
2	2206	1	17.9	18.81	15.2	35.54	35.62	35.43	34.4365	14.4093	2	0.339204	0.304788	0.19421	0.838202	0.682847	0.606046	0.416787	0.56856		5.17241	0	0	0	0	0	0	0	0	0	0	0	0.517241	0	0	0	0	0	0.948276	0.0862069	0.172414	0	0	0	2.06897	0	0	1.2069	1.2931
2	2208	1	17.18	19.28	13.57	35.53	35.58	35.18	35.02	14.0642	1	0.329714	0.333195	0.206422	0.869331	0.502769	0.45787	0.286098	0.415579		12	0	0	0	2.07143	0	0	0	0	0	0	0	4.5	0.285714	0	0	0	0	0.142857	0.142857	0.0714286	0.0714286	0	1.42857	0	0	3.14286	0	1.28571
2	2210	1	18	18.7	15.29	35.59	35.62	35.44	35.6248	13.6818	2	0.324902	0.393015	0.191996	0.909913	0.332584	0.396252	0.226889	0.318575		3.79085	0	0	0	0	0	0	0.196078	0	0	0	0	0	0.457516	0.0653595	0	0.0653595	0	0	1.63399	0.0653595	0.196078	0	0.653595	0	0.457516	10.9804	0	0.784314
2	2212	1	18.09	18.65	14.81	35.6	35.62	35.4	36.239	13.308	0	0.336162	0.390487	0.177014	0.903663	0.330853	0.39566	0.218029	0.314847		20	0	0	0	0	0	0	0	1.6	0	0	0.3	1.5	0.2	0	0.3	0	0	0	0	0	0.3	0.6	4.6	0	0	11.6	0	14
2	2214	1	16.15	18.45	12.47	35.5	35.61	35.1	36.8322	12.9385	2	0.332075	0.342623	0.21406	0.888758	0.340843	0.378567	0.234217	0.317876		1.92308	0	0	0	0	0	0	0	0	0	0	0.0769231	0	0	0	0	0	0	0	0	0	0	0	0.0769231	0	0	0.769231	0	0.461538
2	2216	1	14.29	17.39	11.42	35.29	35.6	35	37.4183	12.5513	1	0.313152	0.321509	0.303518	0.938179	0.350599	0.369087	0.283286	0.334324		0.21978	0	0	0	0	0	0	0	0	0	0	0	0	0	0	0	0	0	0	0.0549451	0	0	0	0.769231	0	0	0.274725	0	0.10989
2	2218	1	11.85	15.75	8.85	34.87	35.2	34.6	37.9893	12.1565	2	0.296603	0.339582	0.38951	1.0257	0.348743	0.362456	0.333565	0.348255		0	0	0	0	0	0	0	0	0	0	0	0	0	0	0	0	0	0	0	0.47619	0	0	0	0	0	0	7.14286	0	0.357143
2	2220	1	12.73	16.33	9.25	35.07	35.44	34.7	38.5898	11.7487	2	0.293287	0.351644	0.428409	1.07334	0.324049	0.362139	0.362168	0.349452		0.375	0	0	0	0.0625	0	0	0	0	0	0	0	0	0	0	0	0	0	0	2.125	0	0.125	0.0625	0	0	0	9.375	0	0.25
2	2222	1	14.55	16.56	11.34	35.28	35.57	34.89	39.1843	11.3302	2	0.272812	0.372144	0.424315	1.06927	0.28628	0.368093	0.367388	0.340587		13.037	0	0	0	0	0	0	0	0	0	0	0.148148	0	0	0	0	0	0	0	4.74074	0.148148	0	0	1.03704	0	0	16.5926	0	47.4074
2	2224	1	16.89	17.09	14.99	35.6	35.6	35.41	39.6823	10.9302	2	0.251796	0.390853	0.403351	1.046	0.262219	0.38552	0.361754	0.336498		5	0	0	0	0	0	0	0	0.142857	0	0	0.142857	0	0	0	0	0	0	0	1.35714	0.0714286	0.142857	0	0.0714286	0	0	11.4286	0	14.2857
2	2226	1	16.7	16.87	13.15	35.59	35.6	35.19	40.3775	10.532	1	0.254595	0.406448	0.402265	1.06331	0.248569	0.413025	0.362392	0.341329		1.38889	0	0	0	0	0	0	0	0	0	0	0.138889	0	0	0	0	0	0	0	2.77778	0	0	0.277778	2.91667	0	0	17.3611	0	194.444
2	2228	1	13.31	16.17	9.86	35.16	35.46	34.79	40.9778	10.0573	2	0.265559	0.36091	0.361892	0.988361	0.255078	0.406584	0.342722	0.334795		0.166667	0.0990099	0	0	0	0	0	0	0	0	0	0.0990099	0	0.0990099	0	0	0	0	0	2.07921	0	0	0	0.19802	0	0	10.396	0	0.891089
2	2230	2	12	16.04	9.4	35.11	35.43	34.73	41.5328	9.6432	0	0.268344	0.365122	0.331829	0.965295	0.279805	0.382256	0.32558	0.329214		0	0	0	0	0	0.79646	0	0	0	0	0.0884956	0	0	0	0	0	0	0	0	0.442478	0	0	0	0.0884956	0	0	0	0	0
2	2232	2	8.2	11.67	7.22	34.39	34.47	34.41	42.11	9.1905	2	0.274894	0.378159	0.334374	0.987427	0.298919	0.361494	0.307003	0.322472		0	0	0	0	0	1.47887	0	0	0	0	0	0.492958	0	0	0	0	0	0	0	7.39437	0	0	0	8.80282	0	0	0.0704225	0.0704225	0
2	2234	2	8.21	11.48	6.79	34.39	34.39	34.37	42.6912	8.7402	0	0.318139	0.346154	0.291943	0.956236	0.301607	0.343966	0.288362	0.311312		0	0	0	0	0	1.23529	0	0	0	0.0588235	0	0.352941	0	0	0	0.0588235	0	0	0	49.4118	0	0	0	0.0588235	0.0588235	0	0.529412	0	0
2	2236	2	8.55	11	7.61	34.4	34.4	34.43	43.2668	8.2662	2	0.300863	0.305001	0.252769	0.858633	0.300648	0.316247	0.271787	0.296227		0	0	0	0	0	0	0	0	0	0	0	0.322581	0	0	0	0	0	0	0	23.2258	0	0	0	0	2.09677	0	2.41935	0	0
2	2238	3	9.04	10.72	7.18	34.54	34.51	34.42	43.8445	7.7982	0	0.313987	0.284463	0.244399	0.842849	0.291072	0.27958	0.283203	0.284618		0	0	0	0	0	1.02564	0	0	0	0	0	0.0854701	0	0	0	0	0	0	0	1.28205	0	0	0	34.188	0	0	14.359	0	0
2	2240	3	6.99	9.51	5.18	34.25	34.27	34.22	44.4175	7.326	2	0.310208	0.262123	0.35158	0.923911	0.281902	0.254952	0.302912	0.279922		0	0	0	0	0	1.07527	0	0	0	0	0	0.107527	0	0.107527	0	0	0	0	0	9.46237	0	0	0	2.7957	0.215054	0	0.107527	0	0
2	2242	4	5.71	7.63	4	33.97	33.84	34.14	44.9787	6.8065	0	0.274947	0.258623	0.426348	0.959918	0.26232	0.24935	0.326332	0.279334		0	0	0	0	0	0	0.947368	0	0	0	0	0.842105	0	0	0	0	0	0	0	21.0526	0	0	0	0	0.526316	0	0	0	0
2	2244	4	4.76	7.16	3.66	33.84	33.8	34.12	45.6285	6.1333	2	0.215755	0.243366	0.378855	0.837976	0.228123	0.233776	0.342435	0.268111		0	0	0	0	0	1.62602	0	0	0	0	0	2.11382	0	0	0	0	0	0	0	16.2602	0	0	0.162602	0.487805	38.2114	0	0	0	0
2	2246	4	5.2	7.4	3.44	33.79	33.77	34.11	46.0973	5.7627	0	0.200167	0.206945	0.350063	0.757175	0.206353	0.221844	0.328748	0.252315		0	0	0	0	0	0.0769231	0	0	0	0	0	1.15385	0	0	0	0	0	0	0	55.3846	0.0769231	0	0.384615	0	23.0769	0	0	0	0
2	2247	4	4.61	7	3.66	33.81	33.77	34.12	46.3857	5.5047	1	0.193931	0.191607	0.346347	0.731885	0.198516	0.212112	0.320173	0.2436		0	0	0	0	0	0.434783	0	0	0	0	0	1.13043	0	0	0	0	0	0	0	7.65217	0	0	0.695652	0.347826	5.3913	0	0	0	0
2	2249	4	4.98	7.2	3.77	33.92	33.83	34.12	46.9277	4.97	2	0.185835	0.179176	0.311946	0.676957	0.19388	0.203421	0.306689	0.234663		0	0	0	0	0	0	0	0	0	0	0	0	0	0	0	0	0	0	0	0.342466	0	0	0	0	0.342466	0	0	0	0
2	2251	4	5.31	7.09	3.68	33.93	33.8	34.12	47.4983	4.422	1	0.190792	0.192447	0.292075	0.675314	0.199685	0.206484	0.279501	0.228557		0	0	0	0	0	0	0	0	0	0	0	0	0	0	0	0	0	0	0	0.9375	0	0	0	0	0.0625	0	0	0	0
2	2253	4	4.35	6.9	3.65	33.9	33.78	34.11	48.0575	3.996	2	0.205953	0.207589	0.258295	0.671837	0.221505	0.231312	0.278003	0.243607		0	0	0	0	0	0	0	0	0	0	0	0	0	0	0	0	0	0	0	0	0	0	0.25	0	1	0	0	0	0
2	2255	5	4.23	6.07	3.02	33.86	33.78	34.12	48.5278	3.3028	2	0.243289	0.25495	0.261278	0.759517	0.246792	0.259978	0.295162	0.267311		0	0	0	0	0	0	0	0	0	0	0	0	0	0	0	0	0	0	0	0.245902	0	0	0	0	0.245902	0	0	0	0
2	2257	5	3.11	5.12	2.42	33.89	33.79	34.16	49.1713	2.6988	0	0.301861	0.312211	0.329356	0.943428	0.287874	0.320756	0.357259	0.321963		0	0	0	0	0	0	0	0	0	0	0	0	0	0	0	0	0	0	0	0	0	0	0	0	0	0	0	0	0
2	2259	5	3.35	5.03	2.35	33.88	33.79	34.17	49.6893	2.0833	2	0.327668	0.33779	0.380892	1.04635	0.309779	0.358142	0.417213	0.361711		0	0	0	0	0	0	0	0.103093	0	0	0	0.103093	0	0	0	0	0	0	0	0.927835	0	0	0	0	22.268	0	0	0	0
2	2261	5	3.47	5	2.6	33.86	33.78	34.13	50.2323	1.4103	0	0.336132	0.418804	0.437051	1.19199	0.322461	0.379327	0.464823	0.38887		0	0	0	0	0	0	0	0.25	0	0	0	0.5	0	0	0	0	0	0	0	1.375	0	0	0.25	0	6.25	0	0	0	0
2	2263	6	1.78	4.25	2.21	33.95	33.81	34.25	50.7673	0.8265	2	0.342936	0.422813	0.439515	1.20526	0.318344	0.370615	0.459215	0.382725		0	0	0	0	0	0	0	0.288462	0	0	0	0	0	0	0	0.0961538	0	0	0	67.6923	0	0	1.92308	0.0961538	3.84615	0	0	0	0
2	2266	6	1.32	2.87	1.88	33.88	33.71	34.44	51.6121	0.0022	2	0.328496	0.333954	0.341835	1.00428	0.274965	0.312815	0.412138	0.333306		0	0	0	0	0	0	0	0	0	0	0	0	0	0	0	0	0	0	0	0.272727	0	0	1.63636	0.727273	6.09091	0	0	0	0
2	2268	6	1.44	2.9	1.94	33.95	33.74	34.47	52.2738	-0.0035	2	0.241795	0.25828	0.339747	0.839822	0.242411	0.288121	0.410098	0.313543		0	0	0	0	0	0	0	0.111111	0	0	0	0.222222	0	0	0	0	0	0	0	0	0	0	2.33333	0.666667	1	0	0	0	0
2	2270	6	0.24	0.92	1.6	34.06	33.77	34.58	52.9303	0.1833	0	0.205089	0.292813	0.391623	0.889525	0.211941	0.28628	0.405341	0.301187		0	0	0	0	0	0	0	0	0	0	0	0.3	0	0	0	0	0	0	0	0.4	0	0	0.4	0.2	0.7	0	0	0	0
2	2272	7	0.14	1.29	1.61	34.03	33.75	34.58	53.5931	0.2667	2	0.199489	0.332301	0.380068	0.911858	0.215163	0.316798	0.397581	0.309847		0	0	0	0	0	0	0	0	0	0	0	0.165289	0	0	0	0	0	0	0	0.413223	0	0	0.826446	7.43802	7.85124	0	0	0	0
2	2273	7	0.31	1.19	1.63	34.04	33.77	34.59	53.8925	0.0015	2	0.206167	0.334536	0.362735	0.903438	0.218494	0.32753	0.388488	0.311504		0	0	0	0	0	0	0	0.16	0	0	0	3.28	0	0	0	0	0	0	0	0.16	0	0	0.32	1.36	1.52	0	0	0	0
2	2274	7	0.27	1.09	1.63	34.01	33.77	34.59	54.2507	-0.0027	2	0.214795	0.340452	0.344586	0.899833	0.22506	0.332617	0.357296	0.304991		0	0	0	0	0	0	0	0	0	0	0	2.88344	0	0	0	0	0	0	0	0.981595	0	0	0.490798	4.84663	1.28834	0	0	0	0
2	2275	7	-0.81	0.58	1.28	33.94	33.81	34.51	54.5837	-0.0095	1	0.21994	0.338875	0.321379	0.880194	0.227361	0.332273	0.337191	0.298942		0	0	0	0	0	0	0	0	0	0	0	0.10101	0	0	0	0	0	0	0	8.18182	0	0	0.40404	0.40404	0.808081	0	0	0	0
2	2277	7	-0.2	0.37	1.81	34.06	33.81	34.56	55.2412	0.003	1	0.213673	0.318484	0.279612	0.811769	0.220817	0.327453	0.302775	0.283682		0	0	0	0	0	0	0	0	0	0	0	0.2	0	0	0	0	0	0	0	19.8	0	0	2.4	0.1	1.5	0	0	0	0
2	2278	8	-0.09	0.3	1.5	34.1	33.89	34.55	55.5677	0.0022	2	0.204518	0.315734	0.280917	0.801169	0.211703	0.32137	0.280533	0.271202		0	0	0	0	0	0	0	0	0	0	0	0.3	0	0	0	0	0	0	0	8.8	0	0	0.8	0.3	1	0	0	0	0
2	2279	8	-0.39	0.3	1.45	34.13	33.91	34.59	55.8997	0.0013	2	0.193583	0.313545	0.278399	0.785527	0.204613	0.315773	0.269889	0.263425		0	0	0	0	0	0	0	0	0	0	0	0	0	0	0	0	0	0.2	0	76.8	0	0	3.8	2.1	2.5	0	0	0	0
2	2280	9	-0.53	0.29	0.5	34.26	34.04	34.57	56.2222	0.0023	1	0.188629	0.313314	0.267229	0.769172	0.199098	0.314115	0.270152	0.261122		0	0	0	0	0	0	0	0	0	0	0	0	0	0	0	0	0	0.140845	0	19.7183	0	0	3.4507	2.11268	0.492958	0	0	0	0
2	2281	9	-0.28	0.2	0.83	34.34	34.14	34.65	56.5618	0.0023	0	0.193664	0.313352	0.262674	0.76969	0.197324	0.31524	0.271914	0.261493		0	0	0	0	0	0	0	0	0	0	0	0	0	0	0	0.142857	0	0.571429	0	28.5714	0	0	1.92857	0.285714	0.214286	0	0	0	0
2	2282	9	-0.348	0.02	0.59	34.306	34.18	34.64	56.8968	-0.0098	2	0.207454	0.338328	0.262639	0.808421	0.198146	0.306117	0.280217	0.261493		0	0	0	0	0	0	0	0	0	0	0	0	0	0	0	0	0	0.133333	0	13.9333	0	0	0.133333	2.13333	0	0	0	0	0
3	2206	1	16.61	18.81	15.2	35.54	35.62	35.43	34.4365	14.4093	2	0.339204	0.304788	0.19421	0.838202	0.682847	0.606046	0.416787	0.56856		0	0	0	0	0	0	0	0.238095	0	0	0	0	0	0.0793651	0	0	0	0	0	0.396825	0	0	0	0.396825	0	0	0	0	0
3	2208	1	15.11	19.28	13.57	35.4	35.58	35.18	35.02	14.0642	1	0.329714	0.333195	0.206422	0.869331	0.502769	0.45787	0.286098	0.415579		0.152672	0	0	0	0	0	0	0	0	0	0	0	0	0.0763359	0	0	0	0	0	1.0687	0	0	0	0.458015	0	0.610687	0	0	0.0763359
3	2210	1	16.12	18.7	15.29	35.5	35.62	35.44	35.6248	13.6818	2	0.324902	0.393015	0.191996	0.909913	0.332584	0.396252	0.226889	0.318575		1.08108	0	0	0	0.186615	0	0	0	0	0	0	0	0.405405	0.02574	0	0	0	0	0.01287	0.01287	0.00643501	0.00643501	0	0.1287	0	0	0.28314	0	0.11583
3	2212	1	16.39	18.65	14.81	35.53	35.62	35.4	36.239	13.308	0	0.336162	0.390487	0.177014	0.903663	0.330853	0.39566	0.218029	0.314847		0.11236	0	0	0	0	0	0	0.168539	0	0	0	0	0	0.0561798	0	0.0561798	0	0	0.0561798	0.505618	0	0	0	0	0	0	0.0561798	0	0.505618
3	2214	1	13.54	18.45	12.47	35.22	35.61	35.1	36.8322	12.9385	2	0.332075	0.342623	0.21406	0.888758	0.340843	0.378567	0.234217	0.317876		0	0	0	0	0	0	0	0	0	0.0689655	0	0	0	0	0	0.0689655	0	0	0	0.0689655	0	0	0	0.689655	0	0	0.137931	0	0
3	2216	1	11.69	17.39	11.42	34.95	35.6	35	37.4183	12.5513	1	0.313152	0.321509	0.303518	0.938179	0.350599	0.369087	0.283286	0.334324		0	0	0	0	0	0	0	0	0	0	0	0	0	0.113636	0	0	0	0	0	0	0	0	0	0.340909	0	0	0.113636	0	0
3	2218	1	9.5	15.75	8.85	34.68	35.2	34.6	37.9893	12.1565	2	0.296603	0.339582	0.38951	1.0257	0.348743	0.362456	0.333565	0.348255		0	0	0	0	0	0.462963	0	0	0	0	0	0	0	0	0	0	0	0	0	0.0925926	0	0	0	0.37037	0	0	0.37037	0	0.0925926
3	2220	1	10.13	16.33	9.25	34.8	35.44	34.7	38.5898	11.7487	2	0.293287	0.351644	0.428409	1.07334	0.324049	0.362139	0.362168	0.349452		0	0	0	0	0.0980392	0	0	0.0980392	0	0	0	0	0	0	0	0.0980392	0	0	0	0.196078	0	0	0	0.490196	0	0	0.294118	0	0.0980392
3	2222	1	12.3	16.56	11.34	35.04	35.57	34.89	39.1843	11.3302	2	0.272812	0.372144	0.424315	1.06927	0.28628	0.368093	0.367388	0.340587		0	0	0	0	0.103093	0	0	0	0.103093	0	0	0	0	0	0	0.103093	0	0	0	1.13402	0	0.103093	0	0.412371	0	0	0	0	0.309278
3	2224	1	16.09	17.09	14.99	35.54	35.6	35.41	39.6823	10.9302	2	0.251796	0.390853	0.403351	1.046	0.262219	0.38552	0.361754	0.336498		0	0	0.0909091	0	1.36364	0	0	0	0	0	0	0.0909091	0	0	0	0	0	0	0	1.09091	0.0909091	0	0	3.81818	0	0	0.727273	0	0.363636
3	2226	1	14.46	16.87	13.15	35.33	35.6	35.19	40.3775	10.532	1	0.254595	0.406448	0.402265	1.06331	0.248569	0.413025	0.362392	0.341329		0.0510204	0	0	0	1.22449	0	0	0	0	0	0	0.102041	0	0	0	0	0	0	0.0510204	0.765306	0	0.102041	0.0510204	1.12245	0	0	2.65306	0	0.561224
3	2228	1	10.78	16.17	9.86	34.88	35.46	34.79	40.9778	10.0573	2	0.265559	0.36091	0.361892	0.988361	0.255078	0.406584	0.342722	0.334795		0	0	0	0	0	0.0990099	0	0	0	0	0	0	0	0.0990099	0	0	0	0	0	0.693069	0.0990099	0	0	0.594059	0	0	0.19802	0	0
3	2230	2	10.22	16.04	9.4	34.8	35.43	34.73	41.5328	9.6432	0	0.268344	0.365122	0.331829	0.965295	0.279805	0.382256	0.32558	0.329214		0	0	0	0	0	0	0.413793	0	0	0	0.0689655	0	0	0	0	0	0	0	0.0689655	0.137931	0	0	0	1.17241	0	0	1.10345	0	0.482759
3	2232	2	7.49	11.67	7.22	34.4	34.47	34.41	42.11	9.1905	2	0.274894	0.378159	0.334374	0.987427	0.298919	0.361494	0.307003	0.322472		0	0	0	0	0	0.19802	0	0	0	0	0	0	0	0	0	0	0	0	0	1.08911	0	0	0	1.18812	0	0	0.29703	0	0
3	2234	2	7.29	11.48	6.79	34.4	34.39	34.37	42.6912	8.7402	0	0.318139	0.346154	0.291943	0.956236	0.301607	0.343966	0.288362	0.311312		0	0	0	0	0	0.121951	0	0	0	0	0	0	0	0	0	0.121951	0	0	0	2.56098	0	0	0	0	0	0	0.365854	0	0
3	2236	2	7.92	11	7.61	34.42	34.4	34.43	43.2668	8.2662	2	0.300863	0.305001	0.252769	0.858633	0.300648	0.316247	0.271787	0.296227		0	0	0	0	0	0.483871	0	0	0	0	0	0	0	0	0	0	0	0	0	0.860215	0	0	0	3.3871	0	0	0	0	0
3	2238	3	7.78	10.72	7.18	34.47	34.51	34.42	43.8445	7.7982	0	0.313987	0.284463	0.244399	0.842849	0.291072	0.27958	0.283203	0.284618		0	0	0	0	0	0.0869565	0	0	0	0	0	0.0869565	0	0	0	0	0	0	0	0.26087	0	0	0	0.0869565	0	0	0	0	0
3	2240	3	6.01	9.51	5.18	34.27	34.27	34.22	44.4175	7.326	2	0.310208	0.262123	0.35158	0.923911	0.281902	0.254952	0.302912	0.279922		0	0	0	0	0	0	0	0	0	0	0	0	0	0	0	0.15748	0	0	0	0.944882	0	0	0	0	0.15748	0	0	0	0
3	2242	4	4.52	7.63	4	34.1	33.84	34.14	44.9787	6.8065	0	0.274947	0.258623	0.426348	0.959918	0.26232	0.24935	0.326332	0.279334		0	0	0	0	0	0	0.434783	0	0	0	0	0.248447	0	0	0	0.124224	0	0	0	6.45963	0.124224	0	0.0621118	0	0.124224	0	0	0	0
3	2244	4	3.94	7.16	3.66	34.08	33.8	34.12	45.6285	6.1333	2	0.215755	0.243366	0.378855	0.837976	0.228123	0.233776	0.342435	0.268111		0	0	0	0	0	0	0	0	0	0	0	0.314961	0	0	0	0	0	0	0	2.59843	0	0	0.15748	0	0.472441	0	0	0	0
3	2246	4	3.82	7.4	3.44	34.05	33.77	34.11	46.0973	5.7627	0	0.200167	0.206945	0.350063	0.757175	0.206353	0.221844	0.328748	0.252315		0	0	0	0	0	0.238095	0	0	0	0	0	0.238095	0	0	0	0	0	0	0	6.66667	0	0	0.15873	0	0.15873	0	0	0	0
3	2247	4	3.85	7	3.66	34.08	33.77	34.12	46.3857	5.5047	1	0.193931	0.191607	0.346347	0.731885	0.198516	0.212112	0.320173	0.2436		0	0	0	0	0	0	0	0	0	0	0	0.56	0	0	0	0	0	0	0	0.88	0.08	0	0.16	0	0.16	0	0	0	0
3	2249	4	4.05	7.2	3.77	34.1	33.83	34.12	46.9277	4.97	2	0.185835	0.179176	0.311946	0.676957	0.19388	0.203421	0.306689	0.234663		0	0	0	0	0	0	0	0	0	0	0	0.208333	0	0	0	0	0	0	0	0.208333	0	0	0	0	0	0	0	0	0
3	2251	4	4.07	7.09	3.68	34.1	33.8	34.12	47.4983	4.422	1	0.190792	0.192447	0.292075	0.675314	0.199685	0.206484	0.279501	0.228557		0	0	0	0	0	0	0	0	0	0	0	0.190476	0	0	0	0	0	0	0	0.0952381	0	0	0	0	0	0	0	0	0
3	2253	4	7.1	6.9	3.65	33.8	33.78	34.11	48.0575	3.996	2	0.205953	0.207589	0.258295	0.671837	0.221505	0.231312	0.278003	0.243607		0	0	0	0	0	0	0	0	0	0	0	0	0	0	0	0	0	0	0	0	0	0	0	0	0	0	0	0	0
3	2255	5	3.28	6.07	3.02	34.09	33.78	34.12	48.5278	3.3028	2	0.243289	0.25495	0.261278	0.759517	0.246792	0.259978	0.295162	0.267311		0	0	0	0	0	0	0	0	0	0	0	0	0	0	0	0	0	0	0	0	0	0	0	0	0	0	0	0	0
3	2257	5	2.52	5.12	2.42	34.11	33.79	34.16	49.1713	2.6988	0	0.301861	0.312211	0.329356	0.943428	0.287874	0.320756	0.357259	0.321963		0	0	0	0	0	0	0	0	0	0	0	0	0	0	0	0	0	0	0	0	0	0	0	0	0	0	0	0	0
3	2259	5	2.31	5.03	2.35	34.09	33.79	34.17	49.6893	2.0833	2	0.327668	0.33779	0.380892	1.04635	0.309779	0.358142	0.417213	0.361711		0	0	0	0	0	0	0	0	0	0	0	0	0	0.185185	0	0	0	0	0	0	0.185185	0	0.555556	0	0.555556	0	0	0	0
3	2261	5	2.83	5	2.6	34.08	33.78	34.13	50.2323	1.4103	0	0.336132	0.418804	0.437051	1.19199	0.322461	0.379327	0.464823	0.38887		0	0	0	0	0	0	0	0	0	0	0	0.254237	0	0	0	0	0	0	0	0.254237	0.0847458	0	0.59322	0	0.338983	0	0	0	0
3	2263	6	2.13	4.25	2.21	34.19	33.81	34.25	50.7673	0.8265	2	0.342936	0.422813	0.439515	1.20526	0.318344	0.370615	0.459215	0.382725		0	0	0	0	0	0	0	0.185185	0	0	0	0	0	0	0	0	0	0	0	1.75926	0	0	0.185185	0.185185	0.462963	0	0	0	0
3	2266	6	1.62	2.87	1.88	34.31	33.71	34.44	51.6121	0.0022	2	0.328496	0.333954	0.341835	1.00428	0.274965	0.312815	0.412138	0.333306		0	0	0	0	0	0	0	0.0840336	0	0	0	0	0	0	0	0	0	0	0	0	0	0	2.52101	0	0	0	0	0	0
3	2268	6	1.34	2.9	1.94	34.4	33.74	34.47	52.2738	-0.0035	2	0.241795	0.25828	0.339747	0.839822	0.242411	0.288121	0.410098	0.313543		0	0	0	0	0	0	0	0.078125	0	0	0	0	0	0	0	0.390625	0	0	0	0.234375	0	0	2.10938	0	0	0	0	0	0
3	2270	6	1.34	0.92	1.6	34.49	33.77	34.58	52.9303	0.1833	0	0.205089	0.292813	0.391623	0.889525	0.211941	0.28628	0.405341	0.301187		0	0	0	0	0	0	0	0	0	0	0	0.0909091	0	0	0	0	0	0	0	0.0909091	0	0	0.454545	0	0.0909091	0	0	0	0
3	2272	7	1.34	1.29	1.61	34.49	33.75	34.58	53.5931	0.2667	2	0.199489	0.332301	0.380068	0.911858	0.215163	0.316798	0.397581	0.309847		0	0	0	0	0	0	0	0	0	0	0	0.20202	0	0	0	0	0	0	0	0	0	0	0.505051	0.505051	0.30303	0	0	0	0
3	2273	7	1.52	1.19	1.63	34.55	33.77	34.59	53.8925	0.0015	2	0.206167	0.334536	0.362735	0.903438	0.218494	0.32753	0.388488	0.311504		0	0	0	0	0	0	0	0	0	0	0	0	0	0	0	0	0	0	0	0	0	0	0.481928	1.44578	0.240964	0	0	0	0
3	2274	7	1.39	1.09	1.63	34.51	33.77	34.59	54.2507	-0.0027	2	0.214795	0.340452	0.344586	0.899833	0.22506	0.332617	0.357296	0.304991		0	0	0	0	0	0	0	0	0	0	0	0.5	0	0	0	0	0	0	0	0.1	0	0	0.2	1.2	0	0	0	0	0
3	2275	7	0.79	0.58	1.28	34.39	33.81	34.51	54.5837	-0.0095	1	0.21994	0.338875	0.321379	0.880194	0.227361	0.332273	0.337191	0.298942		0	0	0	0	0	0.0854701	0	0	0	0	0	0.25641	0	0	0	0.0854701	0	0	0	0.512821	0	0	1.19658	0	1.11111	0	0	0	0
3	2277	7	1.64	0.37	1.81	34.49	33.81	34.56	55.2412	0.003	1	0.213673	0.318484	0.279612	0.811769	0.220817	0.327453	0.302775	0.283682		0	0	0	0	0	0	0	0	0	0	0	0.08	0	0	0	0.08	0	0	0	0.24	0	0	2.64	0	0.56	0	0	0	0
3	2278	8	1.48	0.3	1.5	34.48	33.89	34.55	55.5677	0.0022	2	0.204518	0.315734	0.280917	0.801169	0.211703	0.32137	0.280533	0.271202		0	0	0	0	0	0.0847458	0	0	0	0	0	0.169492	0	0	0	0.0847458	0	0	0	0	0	0	1.52542	0	0.169492	0	0	0	0
3	2279	8	1.07	0.3	1.45	34.5	33.91	34.59	55.8997	0.0013	2	0.193583	0.313545	0.278399	0.785527	0.204613	0.315773	0.269889	0.263425		0	0	0	0	0	0.0917431	0	0	0	0	0	0	0	0	0	0.183486	0	0.550459	0	2.20183	0	0	4.58716	0	1.19266	0	0	0	0
3	2280	9	0.09	0.29	0.5	34.5	34.04	34.57	56.2222	0.0023	1	0.188629	0.313314	0.267229	0.769172	0.199098	0.314115	0.270152	0.261122		0	0	0	0	0	0	0	0	0	0	0	0	0	0	0	0.0952381	0	0.0952381	0	1.52381	0	0	6.95238	0.0952381	0.285714	0	0	0	0
3	2281	9	0.78	0.2	0.83	34.61	34.14	34.65	56.5618	0.0023	0	0.193664	0.313352	0.262674	0.76969	0.197324	0.31524	0.271914	0.261493		0	0	0	0	0	0	0	0	0	0	0	0	0	0	0	0	0	0.793651	0	3.65079	0	0	2.85714	0	0	0	0	0	0
3	2282	9	0.47	0.02	0.59	34.6	34.18	34.64	56.8968	-0.0098	2	0.207454	0.338328	0.262639	0.808421	0.198146	0.306117	0.280217	0.261493		0	0	0	0	0	0	0	0.10101	0	0	0	0	0	0	0	0	0	0.20202	0	16.1616	0	0	2.92929	0.30303	0	0	0	0	0
																					693.146	1.16172	0.0909091	0.125	5.1098	9.82554	1.79594	2.1177	7.06817	0.127789	0.157461	79.2899	7.17265	9.88343	0.0653595	2.24733	0.0653595	3.14729	2.3516	4313.63	1.77621	1.39594	120.769	459.575	667.573	17.4182	630.291	1.27732	471.494
																					0.433921	0.000727254	5.69107e-05	7.82522e-05	0.00319882	0.00615096	0.00112429	0.00132572	0.0044248	7.99982e-05	9.85734e-05	0.0496368	0.0044902	0.0061872	4.09162e-05	0.00140687	4.09162e-05	0.00197026	0.00147214	2.69878	0.00111194	0.000873884	0.0756033	0.287702	0.417912	0.0109041	0.394573	0.000799624	0.295164
[truncated: 140 more columns]

## Sheet: Layer 1
Temperature Av	Temperature Surface	Temperature 300 m	Salinity Av	Salinity Surface	Salinity 300 m	Latitude, S	Longitude, E	Light conditions	10S	11S	12S	Q4S	10L	11L	12L	Q4L	Acartia longiremis (Lilljeborg, 1853)	Aegistus dubius	Aetideopsis rostrata Sars G.O., 1903	Aetideus armatus (Boeck, 1872)	Aetideus giesbrechti Cleve, 1904	Amphipoda	Amphipoda Hyperia	Amphipoda larvae	Amphipoda Phronima	Amphipoda Themisto	Amphipoda Vibilia	Appendicularia	Bivalvia larvae	Bryozoa larvae	Calanoides acutus (Giesbrecht, 1902)	Calanus propinquus Brady, 1883	Calanus simillimus Giesbrecht, 1902	Calocalanus sp.	Calocalanus contractus Farran, 1926	Calocalanus styliremis Giesbrecht, 1888	Calocalanus tenuis Farran, 1926	Candacia cheirura Cleve, 1904	Candacia maxima Vervoort, 1957	Candacia sp.	Centropages bradyi Wheeler, 1900	Centropages gracilis (Dana, 1849)	Cephalopoda	Chaetognatha	Cirripedia nauplii	Clausocalanus brevipes Frost & Fleminger, 1968	Clausocalanus furcatus (Brady, 1883)	Clausocalanus laticeps Farran, 1929	Clausocalanus pergens Farran, 1926
18.79	18.81	15.2	35.54	35.62	35.43	34.4365	14.4093	2	0.339204	0.304788	0.19421	0.838202	0.682847	0.606046	0.416787	0.56856	0	0	0	0	0.0440917	0	0	0	0.0146972	0	0	0.0734862	0	0	0	0.0734862	0	0	0	0	0.0146972	0	0	0	0	0	0	0.352734	0	1.0582	0	0	0.279248
19.26	19.28	13.57	35.58	35.58	35.18	35.02	14.0642	1	0.329714	0.333195	0.206422	0.869331	0.502769	0.45787	0.286098	0.415579	97.5	0	0	0	0	0	0	0.25	1.5	0	0.5	0.75	0.5	0.25	0.25	1	0	15.75	0	46.5	42	0	0	0	0	0.25	0.25	18	0	52.5	0	0	444
18.7	18.7	15.29	35.62	35.62	35.44	35.6248	13.6818	2	0.324902	0.393015	0.191996	0.909913	0.332584	0.396252	0.226889	0.318575	1.95122	0	0	0	0	0	0	0	0	0	0	0.487805	0	0	0	0	0	0	1.95122	1.21951	2.68293	0	0	0	0	0	0	0	0	1.21951	0	0	0.487805
18.65	18.65	14.81	35.62	35.62	35.4	36.239	13.308	0	0.336162	0.390487	0.177014	0.903663	0.330853	0.39566	0.218029	0.314847	213.333	0	0	0	0	0	0.333333	0	0	0	0	8	0	0	0	2.33333	0	0	34.6667	6.66667	53.3333	0	0	0.333333	0	0	0	8.33333	0	101.333	0	0	373.333
18.44	18.45	12.47	35.61	35.61	35.1	36.8322	12.9385	2	0.332075	0.342623	0.21406	0.888758	0.340843	0.378567	0.234217	0.317876	5.85366	0	0	0	0	0	0	0	0	0	0	0	0	0	0	0	0	0	0.243902	0	0	0	0	0	0	0	0	0	0	0	0	0	0
17.37	17.39	11.42	35.59	35.6	35	37.4183	12.5513	1	0.313152	0.321509	0.303518	0.938179	0.350599	0.369087	0.283286	0.334324	8.33333	0	0	0	0	0	0	0	0.333333	0	0	0.333333	0	0	0	0	0	0	2	0	0.333333	0	0	0	0	0	0	0	0	52	0	0	5.66667
15.75	15.75	8.85	35.2	35.2	34.6	37.9893	12.1565	2	0.296603	0.339582	0.38951	1.0257	0.348743	0.362456	0.333565	0.348255	1.71429	0	0	0	0	0	0	0	0	0	0.571429	0.285714	0	0	0	0	0	0	7.14286	2.85714	0.285714	0	0	0	1.42857	0	0	7.14286	0	23.1429	0	0	6.28571
16.23	16.33	9.25	35.44	35.44	34.7	38.5898	11.7487	2	0.293287	0.351644	0.428409	1.07334	0.324049	0.362139	0.362168	0.349452	18	0	0	0	0	0	0	0	0	0	0	120	0	0	4.5	0	0	0	105	2.5	0	0	0	0	2.25	0	0	27	0	129	0	0	46.5
16.56	16.56	11.34	35.57	35.57	34.89	39.1843	11.3302	2	0.272812	0.372144	0.424315	1.06927	0.28628	0.368093	0.367388	0.340587	54	0	0	0	0	0	0.666667	0	0	0	0	3.66667	0	0	0	0	0	0	24	3.33333	0	0	0	0	0.333333	0	0	7.33333	0	13.5	0	0	4.33333
16.98	17.09	14.99	35.6	35.6	35.41	39.6823	10.9302	2	0.251796	0.390853	0.403351	1.046	0.262219	0.38552	0.361754	0.336498	10.4167	0	0	0	0	0	0.0714286	0	0	0	0	0	0	0	0	0	0	0	0.785714	0	0	0	0	0	0	0	0	0.214286	0.0714286	0.142857	0	0	4.28571
16.79	16.87	13.15	35.6	35.6	35.19	40.3775	10.532	1	0.254595	0.406448	0.402265	1.06331	0.248569	0.413025	0.362392	0.341329	184	0	0	0	0	0	0.138889	0	0	0	0	1.38889	0	0	0.138889	1.25	0	0	48.6111	122.222	0	0	0	0	0.416667	0	0	9.16667	0	183.333	0	0	344.444
15.9	16.17	9.86	35.46	35.46	34.79	40.9778	10.0573	2	0.265559	0.36091	0.361892	0.988361	0.255078	0.406584	0.342722	0.334795	5.12821	0.39604	0	0	0	0	0.19802	0	0	0	0	1.88119	0	0.0990099	0	0	0	0	49.901	8.0198	0	0	0	0	0	0	0	2.67327	0	0.19802	0	0	0
16	16.04	9.4	35.45	35.43	34.73	41.5328	9.6432	0	0.268344	0.365122	0.331829	0.965295	0.279805	0.382256	0.32558	0.329214	28.4444	0.666667	0	0	0	0	0	0	0	0	0	17.7778	0	0	1.11111	1.77778	0	0	92.4444	0	0	0	0	0	0	0	0	7.77778	0	58.6667	0	0	0
10.4	11.67	7.22	34.43	34.47	34.41	42.11	9.1905	2	0.274894	0.378159	0.334374	0.987427	0.298919	0.361494	0.307003	0.322472	0	0	0	0	0	0	1.16667	0	0	0	0	54.1667	0	0	0	0.333333	0	0	58.6667	0	0	0	0	0	0	0	0	3.33333	0	0.333333	0	0	0
10.46	11.48	6.79	34.38	34.39	34.37	42.6912	8.7402	0	0.318139	0.346154	0.291943	0.956236	0.301607	0.343966	0.288362	0.311312	0	0	0	0	0	0	3.2	0	0	0	0	592	0	0	0	39	0.8	0.6	20	0	0	0.2	0	0	0	0	0	8.2	0	464	0	3.6	0
9.92	11	7.61	34.38	34.4	34.43	43.2668	8.2662	2	0.300863	0.305001	0.252769	0.858633	0.300648	0.316247	0.271787	0.296227	0	0	0	0	0	0	0.163934	0	0	0	0	3.11475	0	0	0	0	0	0	2.62295	0	0	0	0	0	0	0	0	0.327869	0	0	0	0	0
10.26	10.72	7.18	34.49	34.51	34.42	43.8445	7.7982	0	0.313987	0.284463	0.244399	0.842849	0.291072	0.27958	0.283203	0.284618	0	0	0	0	0	0	4.2623	0	0	0	0	45.9016	0	0	0	249.18	0	0	57.377	0	0	1.63934	1.80328	0	0	0	0	3.44262	0	72.1311	0	2.13115	0
8.7	9.51	5.18	34.26	34.27	34.22	44.4175	7.326	2	0.310208	0.262123	0.35158	0.923911	0.281902	0.254952	0.302912	0.279922	0	0	0	0.123457	0	0	0.740741	0	0	0	0	1669.14	0	0	0	19.1358	58.0247	0	1.7284	0	0	0	0	0	0	0	0	43.5802	0	0.37037	0	0.864198	0
7.46	7.63	4	33.86	33.84	34.14	44.9787	6.8065	0	0.274947	0.258623	0.426348	0.959918	0.26232	0.24935	0.326332	0.279334	0	0	0	0	0	0	5	0	0	0	0	128	0	0	1.2	0.2	20	0	0	0	0	0	0	0	0	0	0	1.2	0	5.4	0	1	0
6.81	7.16	3.66	33.8	33.8	34.12	45.6285	6.1333	2	0.215755	0.243366	0.378855	0.837976	0.228123	0.233776	0.342435	0.268111	0	0	0	0	0	0	7.4	0	0	0	0	67.2	0	0	2.6	0	16	0	0	0	0	0	0	0	0	0	0	0	1.4	0	0	0	0
7.14	7.4	3.44	33.74	33.77	34.11	46.0973	5.7627	0	0.200167	0.206945	0.350063	0.757175	0.206353	0.221844	0.328748	0.252315	0	0	0	0	0	0	5.25	0	0	0	0	328	0	0	0	0	14.75	0	0	0	0	0	0	0	0	0	0	0.5	0	248	0	52	0
6.73	7	3.66	33.74	33.77	34.12	46.3857	5.5047	1	0.193931	0.191607	0.346347	0.731885	0.198516	0.212112	0.320173	0.2436	0	0	0	0	0	0	4.16667	0	0	0	0	280	0	0	0.5	0	88.3333	0	0	0	0	0	0	0	0	0	0	0.166667	0	350	0	23.3333	0
6.81	7.2	3.77	33.84	33.83	34.12	46.9277	4.97	2	0.185835	0.179176	0.311946	0.676957	0.19388	0.203421	0.306689	0.234663	0	0	0	0	0	0	2.06897	0	0	0	0	20.6897	0	0	2.75862	0	12.7586	0	0	0	0	0	0	0	0	0	0	8.62069	0	0	0	0.172414	0
7.1	7.09	3.68	33.8	33.8	34.12	47.4983	4.422	1	0.190792	0.192447	0.292075	0.675314	0.199685	0.206484	0.279501	0.228557	0	0	0	0	0	0	0	0	3	0	0	284	0	0	0.5	0	6	0	0	0	0	0	0	0	0	0	0	0.5	0	0	0	0	0
6.75	6.9	3.65	33.77	33.78	34.11	48.0575	3.996	2	0.205953	0.207589	0.258295	0.671837	0.221505	0.231312	0.278003	0.243607	0	0	0	0	0	0	0	0	1.38889	0	0	2.5	0	0	0.972222	0	23.3333	0	0	0	0	0	0	0	0	0	0	2.63889	0	0	0	0.138889	0
6.06	6.07	3.02	33.76	33.78	34.12	48.5278	3.3028	2	0.243289	0.25495	0.261278	0.759517	0.246792	0.259978	0.295162	0.267311	0	0	0	0	0	0	0	0	0.16129	0	0	1.12903	0	0	0	0	0	0	0	0	0	0	0	0	0	0	0	0.16129	0	0	0	0	0
4.91	5.12	2.42	33.79	33.79	34.16	49.1713	2.6988	0	0.301861	0.312211	0.329356	0.943428	0.287874	0.320756	0.357259	0.321963	0	0	0	0	0	0	0	0	0	0	0	1	0	0	0	0	0.5	0	0	0	0	0	0	0	0	0	0	0.375	0	0	0	0.125	0
5.02	5.03	2.35	33.79	33.79	34.17	49.6893	2.0833	2	0.327668	0.33779	0.380892	1.04635	0.309779	0.358142	0.417213	0.361711	0	0	0	0	0	0	0.777778	0	0	0	0	21.1111	0	0	0	0	0.888889	0	0	0	0	0	0	0	0	0	0	3.55556	0	0	0	1.11111	0
4.95	5	2.6	33.79	33.78	34.13	50.2323	1.4103	0	0.336132	0.418804	0.437051	1.19199	0.322461	0.379327	0.464823	0.38887	0	0	0	0	0	0	0	0	1.7	0	0	21	0	0	0.1	0	53	0	0	0	0	0	0.1	0	0	0	0	15.3	0	0	0	9.2	0
4.02	4.25	2.21	33.81	33.81	34.25	50.7673	0.8265	2	0.342936	0.422813	0.439515	1.20526	0.318344	0.370615	0.459215	0.382725	0	0	0	0	0	0	0.217391	0	0	0	0	21.1957	0	0	2.6087	0	63.0435	0	0	0	0	0	0.217391	0	0	0	0	7.6087	0	0	0	2.5	0
2.87	2.87	1.88	33.71	33.71	34.44	51.6121	0.0022	2	0.328496	0.333954	0.341835	1.00428	0.274965	0.312815	0.412138	0.333306	0	0	0	0	0.0118357	0	0	0	0	0	0	0	0	0	0.355072	0	0	0	0	0	0	0	0	0	0	0	0	0.4971	0	0	0	0.224879	0
2.91	2.9	1.94	33.73	33.74	34.47	52.2738	-0.0035	2	0.241795	0.25828	0.339747	0.839822	0.242411	0.288121	0.410098	0.313543	0	0	0	0	0	0	1	0	0	0	0	3.625	0	0	13.5	1	14.5	0	0	0	0	0	0	0	0	0	0	6.75	0	0	0	5.125	0
0.88	0.92	1.6	33.77	33.77	34.58	52.9303	0.1833	0	0.205089	0.292813	0.391623	0.889525	0.211941	0.28628	0.405341	0.301187	0	0	0	0	0	5.22222	1.33333	0	0	0	0	0	0	0	1.77778	4.11111	3	0	0	0	0	0	0	0	0	0	0	5.55556	0	0	3.44444	0	0
1.25	1.29	1.61	33.74	33.75	34.58	53.5931	0.2667	2	0.199489	0.332301	0.380068	0.911858	0.215163	0.316798	0.397581	0.309847	0	0	0	0	0	0	1.5	0	0	0	0	50	0	0	2.75	7	4.125	0	0	0	0	0	0	0	0	0	0	0.625	0	0	0	2.625	0
1.31	1.19	1.63	33.77	33.77	34.59	53.8925	0.0015	2	0.206167	0.334536	0.362735	0.903438	0.218494	0.32753	0.388488	0.311504	0	0	0	0	0	0	13.2632	0	0	0	0	0.315789	0	0	8.84211	9.26316	23.5789	0	0	0	0	0	0	0	0	0	0	4.21053	0	0	0	9.68421	0
1.01	1.09	1.63	33.77	33.77	34.59	54.2507	-0.0027	2	0.214795	0.340452	0.344586	0.899833	0.22506	0.332617	0.357296	0.304991	0	0	0	0	0	0	3.58974	0	0	0	0	6.41026	0	0	17.9487	0.769231	102.564	0	0	0	0	0	0	0	0	0	0	1.28205	0	0	0	1.28205	0
0.43	0.58	1.28	33.81	33.81	34.51	54.5837	-0.0095	1	0.21994	0.338875	0.321379	0.880194	0.227361	0.332273	0.337191	0.298942	0	0	0.125	0	0	0	2.875	0	0	0	0	21	0	0	0.5	4.625	14.375	0	0	0	0	0	0	0	0	0	0	1.375	0	0	0	4.75	0
0.23	0.37	1.81	33.82	33.81	34.56	55.2412	0.003	1	0.213673	0.318484	0.279612	0.811769	0.220817	0.327453	0.302775	0.283682	0	0	0	0	0	0	0.375	0	0	0	0	8	0	0	1.125	1	4.125	0	0	0	0	0	0	0	0	0	0	2.75	0	0	0	5	0
0.2	0.3	1.5	33.88	33.89	34.55	55.5677	0.0022	2	0.204518	0.315734	0.280917	0.801169	0.211703	0.32137	0.280533	0.271202	0	0	0	0	0	0	0.375	0	0	0	0	4.125	0	0	2	0.875	2.875	0	0	0	0	0	0	0	0	0	0	4.375	0	0	0	1.25	0
0.1	0.3	1.45	33.93	33.91	34.59	55.8997	0.0013	2	0.193583	0.313545	0.278399	0.785527	0.204613	0.315773	0.269889	0.263425	0	0	0	0	0	0	0	0	0	0	0	6.66667	0	0	0	0.333333	0.777778	0	0	0	0	0	0	0	0	0	0	0	0	0	0	0.777778	0
0.16	0.29	0.5	34.09	34.04	34.57	56.2222	0.0023	1	0.188629	0.313314	0.267229	0.769172	0.199098	0.314115	0.270152	0.261122	0	0	0	0	0	0	0	0	0	0.31746	0	2.69841	0	0	0.31746	1.74603	0.952381	0	0	0	0	0	0	0	0	0	0	0	0	0	0	0.634921	0
0.1	0.2	0.83	34.14	34.14	34.65	56.5618	0.0023	0	0.193664	0.313352	0.262674	0.76969	0.197324	0.31524	0.271914	0.261493	0	0	0	0	0	0	0	0	0	0.142857	0	1.28571	0	0	0	13.2857	0.857143	0	0	0	0	0	0	0	0	0	0	0.142857	0	0	0	0.714286	0
0.01	0.02	0.59	34.19	34.18	34.64	56.8968	-0.0098	2	0.207454	0.338328	0.262639	0.808421	0.198146	0.306117	0.280217	0.261493	0	0	0	0	0	0	0	0	0	0	0	2.6	0	0	0	1.6	1.4	0	0	0	0	0	0	0	0	0	0	0	0	0	0	0.2	0
																	628.675	1.06271	0.125	0.123457	0.0559274	5.22222	60.134	0.25	8.09821	0.460317	1.07143	3801.52	0.5	0.34901	66.3557	359.893	530.563	16.35	507.142	193.319	98.65	1.83934	2.12067	0.333333	4.42857	0.25	0.25	215.068	1.47143	1756.33	3.44444	128.444	1229.62
	Temperature Av	Temperature Surface	Temperature 300 m	Salinity Av	Salinity Surface	Salinity 300 m	Light conditions	10S	11S	12S	Q4S	10L	11L	12L	Q4L
Temperature Av		1.0482e-56	1.8434e-25	1.7652e-17	7.1295e-18	6.5231e-06	0.89389	1.7206e-05	0.059179	0.30425	0.042402	4.5725e-06	0.00013534	0.17875	0.0010133
Temperature Surface	0.99897		6.3509e-25	7.4391e-17	3.0002e-17	1.2439e-05	0.89665	1.4328e-05	0.06329	0.30133	0.042918	5.1283e-06	0.00018178	0.16001	0.001268
Temperature 300 m	0.96504	0.96282		1.8054e-20	4.3745e-21	6.7345e-10	0.77022	6.6055e-05	0.011894	0.10354	0.061004	2.6009e-06	3.3253e-06	0.12932	0.00034148
Salinity Av	0.91217	0.90549	0.93798		9.4319e-68	3.8961e-12	0.74297	0.0005444	0.00071447	0.17841	0.025442	5.8137e-05	2.645e-07	0.10154	0.0006725
Salinity Surface	0.91613	0.90977	0.94224	0.9997		4.0014e-12	0.72539	0.00048225	0.00084096	0.16935	0.027077	3.892e-05	2.0857e-07	0.10717	0.00052291
Salinity 300 m	0.62806	0.61299	0.78054	0.83377	0.83353		0.51519	0.037546	7.3027e-05	0.018939	0.17401	0.00054135	2.1015e-09	0.20481	0.00041321
Latitude, S	-0.98163	-0.9849	-0.93329	-0.83712	-0.84336	-0.5362	0.93625	5.8464e-06	0.20358	0.31971	0.069025	1.0656e-06	0.00097857	0.19895	0.0012966
Longitude, E	0.97991	0.98401	0.94529	0.88008	0.88534	0.5884	0.96961	7.1157e-05	0.17692	0.1772	0.14104	4.4622e-06	0.00070962	0.050625	0.0039934
Light conditions	0.020956	0.020407	0.045872	0.051492	0.055152	0.10199		0.77432	0.82844	0.79791	0.89977	0.69258	0.53848	0.50408	0.48876
10S	0.60511	0.60958	0.57001	0.50553	0.50961	0.31824	-0.04503		0.00040176	0.62653	4.2064e-06	1.4879e-08	3.5478e-05	0.39616	9.31e-07
11S	0.29007	0.2857	0.38025	0.4962	0.49047	0.56722	0.034041	0.51566		0.33258	2.4082e-10	0.05062	5.7258e-08	0.16006	0.00023132
12S	-0.16038	-0.16134	-0.25166	-0.2091	-0.21345	-0.35653	0.040218	-0.076349	0.15137		1.7712e-05	0.062705	0.25019	5.5807e-08	0.86846
Q4S	0.31095	0.31021	0.2881	0.34056	0.33708	0.21119	0.019789	0.63787	0.79253	0.60439		0.048564	0.0006347	6.9954e-05	8.9134e-05
10L	0.63603	0.63348	0.64824	0.57352	0.5843	0.50572	0.062062	0.73937	0.30002	-0.2863	0.30261		2.3324e-10	0.38081	1.3909e-15
11L	0.54952	0.54068	0.64299	0.69272	0.69693	0.76634	0.096427	0.58673	0.71867	-0.17921	0.50029	0.79289		0.22094	9.0103e-16
12L	-0.20893	-0.2181	-0.23498	-0.25308	-0.24913	-0.19727	0.10469	0.13273	0.21808	0.71908	0.56842	0.13706	0.19056		0.00076057
Q4L	0.4838	0.47559	0.52095	0.4983	0.50689	0.51473	0.10846	0.66916	0.53328	0.026018	0.56161	0.89018	0.8926	0.49401
[truncated: 74 more columns]

## Sheet: Layer 2
Temperature Av	Temperature Surface	Temperature 300 m	Salinity Av	Salinity Surface	Salinity 300 m	Latitude, S	Longitude, E	Light conditions	10S	11S	12S	Q4S	10L	11L	12L	Q4L	Acartia longiremis (Lilljeborg, 1853)	Aegistus dubius	Aetideus acutus Farran, 1929	Aetideus armatus (Boeck, 1872)	Aetideus australis (Vervoort, 1957)	Aetideus giesbrechti Cleve, 1904	Amphipoda	Amphipoda Cyphocaris	Amphipoda Eupronoe	Amphipoda Hyperia	Amphipoda larvae	Amphipoda Phronima	Amphipoda Rhabdosoma	Amphipoda Scina	Amphipoda Streetsia	Amphipoda Themisto	Amphipoda Vibilia	Appendicularia	Bivalvia larvae	Bryozoa larvae	Calanoides acutus (Giesbrecht, 1902)	Calanus propinquus Brady, 1883	Calanus simillimus Giesbrecht, 1902	Calocalanus sp.	Calocalanus contractus Farran, 1926	Calocalanus pavo (Dana, 1852)	Calocalanus styliremis Giesbrecht, 1888	Calocalanus tenuis Farran, 1926	Candacia catula (Giesbrecht, 1889)	Candacia maxima Vervoort, 1957	Candacia varicans (Giesbrecht, 1893)	Centropages bradyi Wheeler, 1900	Centropages gracilis (Dana, 1849)
17.9	18.81	15.2	35.54	35.62	35.43	34.4365	14.4093	2	0.339204	0.304788	0.19421	0.838202	0.682847	0.606046	0.416787	0.56856	5.17241	0	0	0	0	0	0	0	0	0	0.517241	0	0	0	0	0	0.948276	0.0862069	0.172414	0	0	0	2.06897	0	0	1.2069	1.2931	0	0	0	0	0	0
17.18	19.28	13.57	35.53	35.58	35.18	35.02	14.0642	1	0.329714	0.333195	0.206422	0.869331	0.502769	0.45787	0.286098	0.415579	12	0	2.07143	0	0	0	0	0	0	0	4.5	0.285714	0	0	0	0	0.142857	0.142857	0.0714286	0.0714286	0	1.42857	0	0	3.14286	0	1.28571	0.214286	0	0	0.0714286	0	0
18	18.7	15.29	35.59	35.62	35.44	35.6248	13.6818	2	0.324902	0.393015	0.191996	0.909913	0.332584	0.396252	0.226889	0.318575	3.79085	0	0	0	0	0.196078	0	0	0	0	0	0.457516	0.0653595	0	0.0653595	0	0	1.63399	0.0653595	0.196078	0	0.653595	0	0.457516	10.9804	0	0.784314	0.588235	0	0	0	0	0
18.09	18.65	14.81	35.6	35.62	35.4	36.239	13.308	0	0.336162	0.390487	0.177014	0.903663	0.330853	0.39566	0.218029	0.314847	20	0	0	0	0	0	1.6	0	0	0.3	1.5	0.2	0	0.3	0	0	0	0	0	0.3	0.6	4.6	0	0	11.6	0	14	0	0	0	0	0	0.2
16.15	18.45	12.47	35.5	35.61	35.1	36.8322	12.9385	2	0.332075	0.342623	0.21406	0.888758	0.340843	0.378567	0.234217	0.317876	1.92308	0	0	0	0	0	0	0	0	0.0769231	0	0	0	0	0	0	0	0	0	0	0	0.0769231	0	0	0.769231	0	0.461538	0	0	0	0	0	0
14.29	17.39	11.42	35.29	35.6	35	37.4183	12.5513	1	0.313152	0.321509	0.303518	0.938179	0.350599	0.369087	0.283286	0.334324	0.21978	0	0	0	0	0	0	0	0	0	0	0	0	0	0	0	0	0.0549451	0	0	0	0.769231	0	0	0.274725	0	0.10989	0.164835	0	0	0	0	0
11.85	15.75	8.85	34.87	35.2	34.6	37.9893	12.1565	2	0.296603	0.339582	0.38951	1.0257	0.348743	0.362456	0.333565	0.348255	0	0	0	0	0	0	0	0	0	0	0	0	0	0	0	0	0	0.47619	0	0	0	0	0	0	7.14286	0	0.357143	0.47619	0	0	0	0.178571	0
12.73	16.33	9.25	35.07	35.44	34.7	38.5898	11.7487	2	0.293287	0.351644	0.428409	1.07334	0.324049	0.362139	0.362168	0.349452	0.375	0	0.0625	0	0	0	0	0	0	0	0	0	0	0	0	0	0	2.125	0	0.125	0.0625	0	0	0	9.375	0	0.25	0.125	0	0	0	0.125	0
14.55	16.56	11.34	35.28	35.57	34.89	39.1843	11.3302	2	0.272812	0.372144	0.424315	1.06927	0.28628	0.368093	0.367388	0.340587	13.037	0	0	0	0	0	0	0	0	0.148148	0	0	0	0	0	0	0	4.74074	0.148148	0	0	1.03704	0	0	16.5926	0	47.4074	0	0	0	0	0.296296	0
16.89	17.09	14.99	35.6	35.6	35.41	39.6823	10.9302	2	0.251796	0.390853	0.403351	1.046	0.262219	0.38552	0.361754	0.336498	5	0	0	0	0	0	0.142857	0	0	0.142857	0	0	0	0	0	0	0	1.35714	0.0714286	0.142857	0	0.0714286	0	0	11.4286	0	14.2857	0	0	0	0	0	0
16.7	16.87	13.15	35.59	35.6	35.19	40.3775	10.532	1	0.254595	0.406448	0.402265	1.06331	0.248569	0.413025	0.362392	0.341329	1.38889	0	0	0	0	0	0	0	0	0.138889	0	0	0	0	0	0	0	2.77778	0	0	0.277778	2.91667	0	0	17.3611	0	194.444	0	0.138889	0	0	7.22222	0
13.31	16.17	9.86	35.16	35.46	34.79	40.9778	10.0573	2	0.265559	0.36091	0.361892	0.988361	0.255078	0.406584	0.342722	0.334795	0.166667	0.0990099	0	0	0	0	0	0	0	0.0990099	0	0.0990099	0	0	0	0	0	2.07921	0	0	0	0.19802	0	0	10.396	0	0.891089	0	0	0	0	0	0
12	16.04	9.4	35.11	35.43	34.73	41.5328	9.6432	0	0.268344	0.365122	0.331829	0.965295	0.279805	0.382256	0.32558	0.329214	0	0	0	0.79646	0	0	0	0	0.0884956	0	0	0	0	0	0	0	0	0.442478	0	0	0	0.0884956	0	0	0	0	0	0	0	0	0	0	0
8.2	11.67	7.22	34.39	34.47	34.41	42.11	9.1905	2	0.274894	0.378159	0.334374	0.987427	0.298919	0.361494	0.307003	0.322472	0	0	0	1.47887	0	0	0	0	0	0.492958	0	0	0	0	0	0	0	7.39437	0	0	0	8.80282	0	0	0.0704225	0.0704225	0	0	0	0	0	0	0
8.21	11.48	6.79	34.39	34.39	34.37	42.6912	8.7402	0	0.318139	0.346154	0.291943	0.956236	0.301607	0.343966	0.288362	0.311312	0	0	0	1.23529	0	0	0	0.0588235	0	0.352941	0	0	0	0.0588235	0	0	0	49.4118	0	0	0	0.0588235	0.0588235	0	0.529412	0	0	0	0	0	0	0	0
8.55	11	7.61	34.4	34.4	34.43	43.2668	8.2662	2	0.300863	0.305001	0.252769	0.858633	0.300648	0.316247	0.271787	0.296227	0	0	0	0	0	0	0	0	0	0.322581	0	0	0	0	0	0	0	23.2258	0	0	0	0	2.09677	0	2.41935	0	0	0	0	0	0	0	0
9.04	10.72	7.18	34.54	34.51	34.42	43.8445	7.7982	0	0.313987	0.284463	0.244399	0.842849	0.291072	0.27958	0.283203	0.284618	0	0	0	1.02564	0	0	0	0	0	0.0854701	0	0	0	0	0	0	0	1.28205	0	0	0	34.188	0	0	14.359	0	0	0	1.02564	0	0	0	0
6.99	9.51	5.18	34.25	34.27	34.22	44.4175	7.326	2	0.310208	0.262123	0.35158	0.923911	0.281902	0.254952	0.302912	0.279922	0	0	0	1.07527	0	0	0	0	0	0.107527	0	0.107527	0	0	0	0	0	9.46237	0	0	0	2.7957	0.215054	0	0.107527	0	0	0	0	0.215054	0	0	0
5.71	7.63	4	33.97	33.84	34.14	44.9787	6.8065	0	0.274947	0.258623	0.426348	0.959918	0.26232	0.24935	0.326332	0.279334	0	0	0	0	0.947368	0	0	0	0	0.842105	0	0	0	0	0	0	0	21.0526	0	0	0	0	0.526316	0	0	0	0	0	0	0	0	0	0
4.76	7.16	3.66	33.84	33.8	34.12	45.6285	6.1333	2	0.215755	0.243366	0.378855	0.837976	0.228123	0.233776	0.342435	0.268111	0	0	0	1.62602	0	0	0	0	0	2.11382	0	0	0	0	0	0	0	16.2602	0	0	0.162602	0.487805	38.2114	0	0	0	0	0	0	0.0813008	0	0	0
5.2	7.4	3.44	33.79	33.77	34.11	46.0973	5.7627	0	0.200167	0.206945	0.350063	0.757175	0.206353	0.221844	0.328748	0.252315	0	0	0	0.0769231	0	0	0	0	0	1.15385	0	0	0	0	0	0	0	55.3846	0.0769231	0	0.384615	0	23.0769	0	0	0	0	0	0	0.230769	0	0	0
4.61	7	3.66	33.81	33.77	34.12	46.3857	5.5047	1	0.193931	0.191607	0.346347	0.731885	0.198516	0.212112	0.320173	0.2436	0	0	0	0.434783	0	0	0	0	0	1.13043	0	0	0	0	0	0	0	7.65217	0	0	0.695652	0.347826	5.3913	0	0	0	0	0	0	0	0	0	0
4.98	7.2	3.77	33.92	33.83	34.12	46.9277	4.97	2	0.185835	0.179176	0.311946	0.676957	0.19388	0.203421	0.306689	0.234663	0	0	0	0	0	0	0	0	0	0	0	0	0	0	0	0	0	0.342466	0	0	0	0	0.342466	0	0	0	0	0	0	0	0	0	0
5.31	7.09	3.68	33.93	33.8	34.12	47.4983	4.422	1	0.190792	0.192447	0.292075	0.675314	0.199685	0.206484	0.279501	0.228557	0	0	0	0	0	0	0	0	0	0	0	0	0	0	0	0	0	0.9375	0	0	0	0	0.0625	0	0	0	0	0	0	0	0	0	0
4.35	6.9	3.65	33.9	33.78	34.11	48.0575	3.996	2	0.205953	0.207589	0.258295	0.671837	0.221505	0.231312	0.278003	0.243607	0	0	0	0	0	0	0	0	0	0	0	0	0	0	0	0	0	0	0	0	0.25	0	1	0	0	0	0	0	0	0	0	0	0
4.23	6.07	3.02	33.86	33.78	34.12	48.5278	3.3028	2	0.243289	0.25495	0.261278	0.759517	0.246792	0.259978	0.295162	0.267311	0	0	0	0	0	0	0	0	0	0	0	0	0	0	0	0	0	0.245902	0	0	0	0	0.245902	0	0	0	0	0	0	0	0	0	0
3.11	5.12	2.42	33.89	33.79	34.16	49.1713	2.6988	0	0.301861	0.312211	0.329356	0.943428	0.287874	0.320756	0.357259	0.321963	0	0	0	0	0	0	0	0	0	0	0	0	0	0	0	0	0	0	0	0	0	0	0	0	0	0	0	0	0	0	0	0	0
3.35	5.03	2.35	33.88	33.79	34.17	49.6893	2.0833	2	0.327668	0.33779	0.380892	1.04635	0.309779	0.358142	0.417213	0.361711	0	0	0	0	0	0.103093	0	0	0	0.103093	0	0	0	0	0	0	0	0.927835	0	0	0	0	22.268	0	0	0	0	0	0	0.103093	0	0	0
3.47	5	2.6	33.86	33.78	34.13	50.2323	1.4103	0	0.336132	0.418804	0.437051	1.19199	0.322461	0.379327	0.464823	0.38887	0	0	0	0	0	0.25	0	0	0	0.5	0	0	0	0	0	0	0	1.375	0	0	0.25	0	6.25	0	0	0	0	0	0	0.25	0	0	0
1.78	4.25	2.21	33.95	33.81	34.25	50.7673	0.8265	2	0.342936	0.422813	0.439515	1.20526	0.318344	0.370615	0.459215	0.382725	0	0	0	0	0	0.288462	0	0	0	0	0	0	0	0.0961538	0	0	0	67.6923	0	0	1.92308	0.0961538	3.84615	0	0	0	0	0	0	0	0	0	0
1.32	2.87	1.88	33.88	33.71	34.44	51.6121	0.0022	2	0.328496	0.333954	0.341835	1.00428	0.274965	0.312815	0.412138	0.333306	0	0	0	0	0	0	0	0	0	0	0	0	0	0	0	0	0	0.272727	0	0	1.63636	0.727273	6.09091	0	0	0	0	0	0	0	0	0	0
1.44	2.9	1.94	33.95	33.74	34.47	52.2738	-0.0035	2	0.241795	0.25828	0.339747	0.839822	0.242411	0.288121	0.410098	0.313543	0	0	0	0	0	0.111111	0	0	0	0.222222	0	0	0	0	0	0	0	0	0	0	2.33333	0.666667	1	0	0	0	0	0	0	0.222222	0	0	0
0.24	0.92	1.6	34.06	33.77	34.58	52.9303	0.1833	0	0.205089	0.292813	0.391623	0.889525	0.211941	0.28628	0.405341	0.301187	0	0	0	0	0	0	0	0	0	0.3	0	0	0	0	0	0	0	0.4	0	0	0.4	0.2	0.7	0	0	0	0	0	0	0.2	0	0	0
0.14	1.29	1.61	34.03	33.75	34.58	53.5931	0.2667	2	0.199489	0.332301	0.380068	0.911858	0.215163	0.316798	0.397581	0.309847	0	0	0	0	0	0	0	0	0	0.165289	0	0	0	0	0	0	0	0.413223	0	0	0.826446	7.43802	7.85124	0	0	0	0	0	0	0.413223	0	0	0
0.31	1.19	1.63	34.04	33.77	34.59	53.8925	0.0015	2	0.206167	0.334536	0.362735	0.903438	0.218494	0.32753	0.388488	0.311504	0	0	0	0	0	0.16	0	0	0	3.28	0	0	0	0	0	0	0	0.16	0	0	0.32	1.36	1.52	0	0	0	0	0	0	0.08	0	0	0
0.27	1.09	1.63	34.01	33.77	34.59	54.2507	-0.0027	2	0.214795	0.340452	0.344586	0.899833	0.22506	0.332617	0.357296	0.304991	0	0	0	0	0	0	0	0	0	2.88344	0	0	0	0	0	0	0	0.981595	0	0	0.490798	4.84663	1.28834	0	0	0	0	0	0	0.184049	0	0	0
-0.81	0.58	1.28	33.94	33.81	34.51	54.5837	-0.0095	1	0.21994	0.338875	0.321379	0.880194	0.227361	0.332273	0.337191	0.298942	0	0	0	0	0	0	0	0	0	0.10101	0	0	0	0	0	0	0	8.18182	0	0	0.40404	0.40404	0.808081	0	0	0	0	0	0	0.20202	0	0	0
-0.2	0.37	1.81	34.06	33.81	34.56	55.2412	0.003	1	0.213673	0.318484	0.279612	0.811769	0.220817	0.327453	0.302775	0.283682	0	0	0	0	0	0	0	0	0	0.2	0	0	0	0	0	0	0	19.8	0	0	2.4	0.1	1.5	0	0	0	0	0	0	0.2	0	0	0
-0.09	0.3	1.5	34.1	33.89	34.55	55.5677	0.0022	2	0.204518	0.315734	0.280917	0.801169	0.211703	0.32137	0.280533	0.271202	0	0	0	0	0	0	0	0	0	0.3	0	0	0	0	0	0	0	8.8	0	0	0.8	0.3	1	0	0	0	0	0	0	0	0	0	0
-0.39	0.3	1.45	34.13	33.91	34.59	55.8997	0.0013	2	0.193583	0.313545	0.278399	0.785527	0.204613	0.315773	0.269889	0.263425	0	0	0	0	0	0	0	0	0	0	0	0	0	0	0	0.2	0	76.8	0	0	3.8	2.1	2.5	0	0	0	0	0	0	0	0	0	0
-0.53	0.29	0.5	34.26	34.04	34.57	56.2222	0.0023	1	0.188629	0.313314	0.267229	0.769172	0.199098	0.314115	0.270152	0.261122	0	0	0	0	0	0	0	0	0	0	0	0	0	0	0	0.140845	0	19.7183	0	0	3.4507	2.11268	0.492958	0	0	0	0	0	0	0	0	0	0
-0.28	0.2	0.83	34.34	34.14	34.65	56.5618	0.0023	0	0.193664	0.313352	0.262674	0.76969	0.197324	0.31524	0.271914	0.261493	0	0	0	0	0	0	0	0	0	0	0	0	0	0.142857	0	0.571429	0	28.5714	0	0	1.92857	0.285714	0.214286	0	0	0	0	0	0	0.0714286	0	0	0
-0.348	0.02	0.59	34.306	34.18	34.64	56.8968	-0.0098	2	0.207454	0.338328	0.262639	0.808421	0.198146	0.306117	0.280217	0.261493	0	0	0	0	0	0	0	0	0	0	0	0	0	0	0	0.133333	0	13.9333	0	0	0.133333	2.13333	0	0	0	0	0	0	0	0	0	0	0
																	63.0737	0.0990099	2.13393	7.74926	0.947368	1.10874	1.74286	0.0588235	0.0884956	15.5626	6.51724	1.14977	0.0653595	0.597835	0.0653595	1.04561	1.09113	456.596	0.605702	0.835364	23.5298	81.2915	130.626	0.457516	116.549	1.27732	275.57	1.56855	1.16453	2.45316	0.0714286	7.82209	0.2
	Temperature Av	Temperature Surface	Temperature 300 m	Salinity Av	Salinity Surface	Salinity 300 m	Latitude, S	Longitude, E	Light conditions	10S	11S	12S	Q4S	10L	11L	12L	Q4L
Temperature Av		2.426e-35	5.7234e-35	8.0691e-17	1.9923e-19	2.0103e-07	1.3149e-25	6.1415e-27	0.90188	3.1344e-05	0.035899	0.18494	0.056006	4.2885e-06	3.9782e-05	0.13979	0.00079938
Temperature Surface	0.9886		6.3509e-25	1.0432e-13	3.0002e-17	1.2439e-05	7.4947e-33	2.3791e-32	0.89665	1.4328e-05	0.06329	0.30133	0.042918	5.1283e-06	0.00018178	0.16001	0.001268
Temperature 300 m	0.98811	0.96282		3.4362e-20	4.3745e-21	6.7345e-10	7.709e-20	1.4818e-21	0.77022	6.6055e-05	0.011894	0.10354	0.061004	2.6009e-06	3.3253e-06	0.12932	0.00034148
Salinity Av	0.90509	0.86262	0.93594		5.6197e-33	8.1517e-17	2.886e-10	2.6836e-12	0.75337	0.0012186	0.00035344	0.072633	0.049259	5.1612e-05	3.2583e-08	0.086337	0.00046476
Salinity Surface	0.93002	0.90977	0.94224	0.98511		4.0014e-12	1.2685e-12	3.2079e-15	0.72539	0.00048225	0.00084096	0.16935	0.027077	3.892e-05	2.0857e-07	0.10717	0.00052291
Salinity 300 m	0.69758	0.61299	0.78054	0.90504	0.83353		0.00021048	3.3287e-05	0.51519	0.037546	7.3027e-05	0.018939	0.17401	0.00054135	2.1015e-09	0.20481	0.00041321
Latitude, S	-0.96562	-0.9849	-0.93329	-0.79048	-0.84336	-0.5362		5.4214e-34	0.93625	5.8464e-06	0.20358	0.31971	0.069025	1.0656e-06	0.00097857	0.19895	0.0012966
Longitude, E	0.97046	0.98401	0.94529	0.83703	0.88534	0.5884	-0.98672		0.96961	7.1157e-05	0.17692	0.1772	0.14104	4.4622e-06	0.00070962	0.050625	0.0039934
Light conditions	0.019371	0.020407	0.045872	0.049339	0.055152	0.10199	-0.012567	0.0059864		0.77432	0.82844	0.79791	0.89977	0.69258	0.53848	0.50408	0.48876
10S	0.58996	0.60958	0.57001	0.47706	0.50961	0.31824	-0.63054	0.56795	-0.04503		0.00040176	0.62653	4.2064e-06	1.4879e-08	3.5478e-05	0.39616	9.31e-07
11S	0.32089	0.2857	0.38025	0.51983	0.49047	0.56722	-0.19779	0.2098	0.034041	0.51566		0.33258	2.4082e-10	0.05062	5.7258e-08	0.16006	0.00023132
12S	-0.20606	-0.16134	-0.25166	-0.27654	-0.21345	-0.35653	0.1554	-0.20967	0.040218	-0.076349	0.15137		1.7712e-05	0.062705	0.25019	5.5807e-08	0.86846
Q4S	0.29362	0.31021	0.2881	0.30173	0.33708	0.21119	-0.27996	0.22822	0.019789	0.63787	0.79253	0.60439		0.048564	0.0006347	6.9954e-05	8.9134e-05
10L	0.63745	0.63348	0.64824	0.57676	0.5843	0.50572	-0.6665	0.63657	0.062062	0.73937	0.30002	-0.2863	0.30261		2.3324e-10	0.38081	1.3909e-15
11L	0.58372	0.54068	0.64299	0.72756	0.69693	0.76634	-0.48506	0.49643	0.096427	0.58673	0.71867	-0.17921	0.50029	0.79289		0.22094	9.0103e-16
12L	-0.22892	-0.2181	-0.23498	-0.26465	-0.24913	-0.19727	0.1998	-0.30001	0.10469	0.13273	0.21808	0.71908	0.56842	0.13706	0.19056		0.00076057
Q4L	0.49226	0.47559	0.52095	0.51084	0.50689	0.51473	-0.47476	0.4301	0.10846	0.66916	0.53328	0.026018	0.56161	0.89018	0.8926	0.49401
[truncated: 116 more columns]

## Sheet: Layer 3
Temperature Av	Temperature Surface	Temperature 300 m	Salinity Av	Salinity Surface	Salinity 300 m	Latitude, S	Longitude, E	Light conditions	10S	11S	12S	Q4S	10L	11L	12L	Q4L	Acartia longiremis (Lilljeborg, 1853)	Aetideopsis carinata Bradford, 1969	Aetideus acutus Farran, 1929	Aetideus armatus (Boeck, 1872)	Aetideus australis (Vervoort, 1957)	Aetideus giesbrechti Cleve, 1904	Amphipoda	Amphipoda Cyphocaris	Amphipoda Eupronoe	Amphipoda Hyperia	Amphipoda larvae	Amphipoda Phronima	Amphipoda Scina	Amphipoda Themisto	Amphipoda Vibilia	Appendicularia	Bivalvia larvae	Bryozoa larvae	Calanoides acutus (Giesbrecht, 1902)	Calanus propinquus Brady, 1883	Calanus simillimus Giesbrecht, 1902	Calocalanus sp.	Calocalanus contractus Farran, 1926	Calocalanus styliremis Giesbrecht, 1888	Calocalanus tenuis Farran, 1926	Candacia catula (Giesbrecht, 1889)	Candacia maxima Vervoort, 1957	Candacia sp.	Candacia varicans (Giesbrecht, 1893)	Centropages violaceus (Claus, 1863)	Cephalopoda	Chaetognatha	Chiridius gracilis Farran, 1908
16.61	18.81	15.2	35.54	35.62	35.43	34.4365	14.4093	2	0.339204	0.304788	0.19421	0.838202	0.682847	0.606046	0.416787	0.56856	0	0	0	0	0	0.238095	0	0	0	0	0	0.0793651	0	0	0	0.396825	0	0	0	0.396825	0	0	0	0	0.0793651	0	0	0	0	0	0	1.90476	0
15.11	19.28	13.57	35.4	35.58	35.18	35.02	14.0642	1	0.329714	0.333195	0.206422	0.869331	0.502769	0.45787	0.286098	0.415579	0.152672	0	0	0	0	0	0	0	0	0	0	0.0763359	0	0	0	1.0687	0	0	0	0.458015	0	0.610687	0	0.0763359	0.152672	0	0	0	0	0	0	5.41985	0.0763359
16.12	18.7	15.29	35.5	35.62	35.44	35.6248	13.6818	2	0.324902	0.393015	0.191996	0.909913	0.332584	0.396252	0.226889	0.318575	1.08108	0	0.186615	0	0	0	0	0	0	0	0.405405	0.02574	0	0	0.01287	0.01287	0.00643501	0.00643501	0	0.1287	0	0	0.28314	0.11583	0.019305	0	0	0	0.00643501	0.01287	0.00643501	0.617761	0
16.39	18.65	14.81	35.53	35.62	35.4	36.239	13.308	0	0.336162	0.390487	0.177014	0.903663	0.330853	0.39566	0.218029	0.314847	0.11236	0	0	0	0	0.168539	0	0	0	0	0	0.0561798	0.0561798	0	0.0561798	0.505618	0	0	0	0	0	0	0.0561798	0.505618	0	0	0	0	0	0	0	1.96629	0
13.54	18.45	12.47	35.22	35.61	35.1	36.8322	12.9385	2	0.332075	0.342623	0.21406	0.888758	0.340843	0.378567	0.234217	0.317876	0	0	0	0	0	0	0	0.0689655	0	0	0	0	0.0689655	0	0	0.0689655	0	0	0	0.689655	0	0	0.137931	0	0	0	0	0	0	0	0	3.31034	0
11.69	17.39	11.42	34.95	35.6	35	37.4183	12.5513	1	0.313152	0.321509	0.303518	0.938179	0.350599	0.369087	0.283286	0.334324	0	0	0	0	0	0	0	0	0	0	0	0.113636	0	0	0	0	0	0	0	0.340909	0	0	0.113636	0	0	0	0	0	0	0	0	3.29545	0
9.5	15.75	8.85	34.68	35.2	34.6	37.9893	12.1565	2	0.296603	0.339582	0.38951	1.0257	0.348743	0.362456	0.333565	0.348255	0	0	0	0.462963	0	0	0	0	0	0	0	0	0	0	0	0.0925926	0	0	0	0.37037	0	0	0.37037	0.0925926	0	0.0925926	0	0	0	0	0	2.40741	0
10.13	16.33	9.25	34.8	35.44	34.7	38.5898	11.7487	2	0.293287	0.351644	0.428409	1.07334	0.324049	0.362139	0.362168	0.349452	0	0	0.0980392	0	0	0.0980392	0	0	0	0	0	0	0.0980392	0	0	0.196078	0	0	0	0.490196	0	0	0.294118	0.0980392	0	0	0	0	0	0	0	3.23529	0
12.3	16.56	11.34	35.04	35.57	34.89	39.1843	11.3302	2	0.272812	0.372144	0.424315	1.06927	0.28628	0.368093	0.367388	0.340587	0	0	0.103093	0	0	0	0.103093	0	0	0	0	0	0.103093	0	0	1.13402	0	0.103093	0	0.412371	0	0	0	0.309278	0	0	0	0.103093	0	0	0	4.74227	0
16.09	17.09	14.99	35.54	35.6	35.41	39.6823	10.9302	2	0.251796	0.390853	0.403351	1.046	0.262219	0.38552	0.361754	0.336498	0	0.0909091	1.36364	0	0	0	0	0	0	0.0909091	0	0	0	0	0	1.09091	0.0909091	0	0	3.81818	0	0	0.727273	0.363636	0	0	0	0	0	0	0	5.72727	0
14.46	16.87	13.15	35.33	35.6	35.19	40.3775	10.532	1	0.254595	0.406448	0.402265	1.06331	0.248569	0.413025	0.362392	0.341329	0.0510204	0	1.22449	0	0	0	0	0	0	0.102041	0	0	0	0	0.0510204	0.765306	0	0.102041	0.0510204	1.12245	0	0	2.65306	0.561224	0	0	0	0	0	0	0	5.76531	0
10.78	16.17	9.86	34.88	35.46	34.79	40.9778	10.0573	2	0.265559	0.36091	0.361892	0.988361	0.255078	0.406584	0.342722	0.334795	0	0	0	0.0990099	0	0	0	0	0	0	0	0.0990099	0	0	0	0.693069	0.0990099	0	0	0.594059	0	0	0.19802	0	0	0	0	0	0	0	0	6.53465	0
10.22	16.04	9.4	34.8	35.43	34.73	41.5328	9.6432	0	0.268344	0.365122	0.331829	0.965295	0.279805	0.382256	0.32558	0.329214	0	0	0	0	0.413793	0	0	0	0.0689655	0	0	0	0	0	0.0689655	0.137931	0	0	0	1.17241	0	0	1.10345	0.482759	0	0	0	0	0	0	0	1.86207	0
7.49	11.67	7.22	34.4	34.47	34.41	42.11	9.1905	2	0.274894	0.378159	0.334374	0.987427	0.298919	0.361494	0.307003	0.322472	0	0	0	0.19802	0	0	0	0	0	0	0	0	0	0	0	1.08911	0	0	0	1.18812	0	0	0.29703	0	0	0	0	0	0	0	0	4.15842	0
7.29	11.48	6.79	34.4	34.39	34.37	42.6912	8.7402	0	0.318139	0.346154	0.291943	0.956236	0.301607	0.343966	0.288362	0.311312	0	0	0	0.121951	0	0	0	0	0	0	0	0	0.121951	0	0	2.56098	0	0	0	0	0	0	0.365854	0	0	0	0	0	0	0	0	2.68293	0
7.92	11	7.61	34.42	34.4	34.43	43.2668	8.2662	2	0.300863	0.305001	0.252769	0.858633	0.300648	0.316247	0.271787	0.296227	0	0	0	0.483871	0	0	0	0	0	0	0	0	0	0	0	0.860215	0	0	0	3.3871	0	0	0	0	0	0	0	0	0	0	0	3.54839	0
7.78	10.72	7.18	34.47	34.51	34.42	43.8445	7.7982	0	0.313987	0.284463	0.244399	0.842849	0.291072	0.27958	0.283203	0.284618	0	0	0	0.0869565	0	0	0	0	0	0.0869565	0	0	0	0	0	0.26087	0	0	0	0.0869565	0	0	0	0	0	0	0	0	0	0	0	4.17391	0
6.01	9.51	5.18	34.27	34.27	34.22	44.4175	7.326	2	0.310208	0.262123	0.35158	0.923911	0.281902	0.254952	0.302912	0.279922	0	0	0	0	0	0	0	0	0	0	0	0	0.15748	0	0	0.944882	0	0	0	0	0.15748	0	0	0	0	0	0.0787402	0	0	0	0	0.708661	0
4.52	7.63	4	34.1	33.84	34.14	44.9787	6.8065	0	0.274947	0.258623	0.426348	0.959918	0.26232	0.24935	0.326332	0.279334	0	0	0	0	0.434783	0	0	0	0	0.248447	0	0	0.124224	0	0	6.45963	0.124224	0	0.0621118	0	0.124224	0	0	0	0	0	0.0621118	0	0	0	0	4.65839	0
3.94	7.16	3.66	34.08	33.8	34.12	45.6285	6.1333	2	0.215755	0.243366	0.378855	0.837976	0.228123	0.233776	0.342435	0.268111	0	0	0	0	0	0	0	0	0	0.314961	0	0	0	0	0	2.59843	0	0	0.15748	0	0.472441	0	0	0	0	0	0.0787402	0	0	0	0	4.48819	0
3.82	7.4	3.44	34.05	33.77	34.11	46.0973	5.7627	0	0.200167	0.206945	0.350063	0.757175	0.206353	0.221844	0.328748	0.252315	0	0	0	0.238095	0	0	0	0	0	0.238095	0	0	0	0	0	6.66667	0	0	0.15873	0	0.15873	0	0	0	0	0	0.15873	0	0	0	0	2.85714	0
3.85	7	3.66	34.08	33.77	34.12	46.3857	5.5047	1	0.193931	0.191607	0.346347	0.731885	0.198516	0.212112	0.320173	0.2436	0	0	0	0	0	0	0	0	0	0.56	0	0	0	0	0	0.88	0.08	0	0.16	0	0.16	0	0	0	0	0	0.16	0	0	0	0	3.2	0
4.05	7.2	3.77	34.1	33.83	34.12	46.9277	4.97	2	0.185835	0.179176	0.311946	0.676957	0.19388	0.203421	0.306689	0.234663	0	0	0	0	0	0	0	0	0	0.208333	0	0	0	0	0	0.208333	0	0	0	0	0	0	0	0	0	0	0	0	0	0	0	0.833333	0
4.07	7.09	3.68	34.1	33.8	34.12	47.4983	4.422	1	0.190792	0.192447	0.292075	0.675314	0.199685	0.206484	0.279501	0.228557	0	0	0	0	0	0	0	0	0	0.190476	0	0	0	0	0	0.0952381	0	0	0	0	0	0	0	0	0	0	0	0	0	0	0	1.04762	0
7.1	6.9	3.65	33.8	33.78	34.11	48.0575	3.996	2	0.205953	0.207589	0.258295	0.671837	0.221505	0.231312	0.278003	0.243607	0	0	0	0	0	0	0	0	0	0	0	0	0	0	0	0	0	0	0	0	0	0	0	0	0	0	0	0	0	0	0	0.246914	0
3.28	6.07	3.02	34.09	33.78	34.12	48.5278	3.3028	2	0.243289	0.25495	0.261278	0.759517	0.246792	0.259978	0.295162	0.267311	0	0	0	0	0	0	0	0	0	0	0	0	0	0	0	0	0	0	0	0	0	0	0	0	0	0	0	0	0	0	0	0	0
2.52	5.12	2.42	34.11	33.79	34.16	49.1713	2.6988	0	0.301861	0.312211	0.329356	0.943428	0.287874	0.320756	0.357259	0.321963	0	0	0	0	0	0	0	0	0	0	0	0	0	0	0	0	0	0	0	0	0	0	0	0	0	0	0	0	0	0	0	0	0
2.31	5.03	2.35	34.09	33.79	34.17	49.6893	2.0833	2	0.327668	0.33779	0.380892	1.04635	0.309779	0.358142	0.417213	0.361711	0	0	0	0	0	0	0	0	0	0	0	0.185185	0	0	0	0	0.185185	0	0.555556	0	0.555556	0	0	0	0	0	0	0	0	0	0	2.03704	0
2.83	5	2.6	34.08	33.78	34.13	50.2323	1.4103	0	0.336132	0.418804	0.437051	1.19199	0.322461	0.379327	0.464823	0.38887	0	0	0	0	0	0	0	0	0	0.254237	0	0	0	0	0	0.254237	0.0847458	0	0.59322	0	0.338983	0	0	0	0	0	0.0847458	0	0	0	0	4.57627	0
2.13	4.25	2.21	34.19	33.81	34.25	50.7673	0.8265	2	0.342936	0.422813	0.439515	1.20526	0.318344	0.370615	0.459215	0.382725	0	0	0	0	0	0.185185	0	0	0	0	0	0	0	0	0	1.75926	0	0	0.185185	0.185185	0.462963	0	0	0	0	0	0	0	0	0	0	3.42593	0
1.62	2.87	1.88	34.31	33.71	34.44	51.6121	0.0022	2	0.328496	0.333954	0.341835	1.00428	0.274965	0.312815	0.412138	0.333306	0	0	0	0	0	0.0840336	0	0	0	0	0	0	0	0	0	0	0	0	2.52101	0	0	0	0	0	0	0	0	0	0	0	0	3.52941	0
1.34	2.9	1.94	34.4	33.74	34.47	52.2738	-0.0035	2	0.241795	0.25828	0.339747	0.839822	0.242411	0.288121	0.410098	0.313543	0	0	0	0	0	0.078125	0	0	0	0	0	0	0.390625	0	0	0.234375	0	0	2.10938	0	0	0	0	0	0	0	0.078125	0	0	0	0	2.5	0
1.34	0.92	1.6	34.49	33.77	34.58	52.9303	0.1833	0	0.205089	0.292813	0.391623	0.889525	0.211941	0.28628	0.405341	0.301187	0	0	0	0	0	0	0	0	0	0.0909091	0	0	0	0	0	0.0909091	0	0	0.454545	0	0.0909091	0	0	0	0	0	0	0	0	0	0	1.72727	0
1.34	1.29	1.61	34.49	33.75	34.58	53.5931	0.2667	2	0.199489	0.332301	0.380068	0.911858	0.215163	0.316798	0.397581	0.309847	0	0	0	0	0	0	0	0	0	0.20202	0	0	0	0	0	0	0	0	0.505051	0.505051	0.30303	0	0	0	0	0	0.20202	0	0	0	0	0.606061	0
1.52	1.19	1.63	34.55	33.77	34.59	53.8925	0.0015	2	0.206167	0.334536	0.362735	0.903438	0.218494	0.32753	0.388488	0.311504	0	0	0	0	0	0	0	0	0	0	0	0	0	0	0	0	0	0	0.481928	1.44578	0.240964	0	0	0	0	0	0.240964	0	0	0	0	1.92771	0
1.39	1.09	1.63	34.51	33.77	34.59	54.2507	-0.0027	2	0.214795	0.340452	0.344586	0.899833	0.22506	0.332617	0.357296	0.304991	0	0	0	0	0	0	0	0	0	0.5	0	0	0	0	0	0.1	0	0	0.2	1.2	0	0	0	0	0	0	0	0	0	0	0	1.3	0
0.79	0.58	1.28	34.39	33.81	34.51	54.5837	-0.0095	1	0.21994	0.338875	0.321379	0.880194	0.227361	0.332273	0.337191	0.298942	0	0	0	0.0854701	0	0	0	0	0	0.25641	0	0	0.0854701	0	0	0.512821	0	0	1.19658	0	1.11111	0	0	0	0	0	0.17094	0	0	0	0	7.77778	0
1.64	0.37	1.81	34.49	33.81	34.56	55.2412	0.003	1	0.213673	0.318484	0.279612	0.811769	0.220817	0.327453	0.302775	0.283682	0	0	0	0	0	0	0	0	0	0.08	0	0	0.08	0	0	0.24	0	0	2.64	0	0.56	0	0	0	0	0	0	0	0	0	0	2.72	0
1.48	0.3	1.5	34.48	33.89	34.55	55.5677	0.0022	2	0.204518	0.315734	0.280917	0.801169	0.211703	0.32137	0.280533	0.271202	0	0	0	0.0847458	0	0	0	0	0	0.169492	0	0	0.0847458	0	0	0	0	0	1.52542	0	0.169492	0	0	0	0	0	0	0	0	0	0	4.0678	0
1.07	0.3	1.45	34.5	33.91	34.59	55.8997	0.0013	2	0.193583	0.313545	0.278399	0.785527	0.204613	0.315773	0.269889	0.263425	0	0	0	0.0917431	0	0	0	0	0	0	0	0	0.183486	0.550459	0	2.20183	0	0	4.58716	0	1.19266	0	0	0	0	0	0	0	0	0	0	8.25688	0
0.09	0.29	0.5	34.5	34.04	34.57	56.2222	0.0023	1	0.188629	0.313314	0.267229	0.769172	0.199098	0.314115	0.270152	0.261122	0	0	0	0	0	0	0	0	0	0	0	0	0.0952381	0.0952381	0	1.52381	0	0	6.95238	0.0952381	0.285714	0	0	0	0	0	0	0	0	0	0	6.47619	0
0.78	0.2	0.83	34.61	34.14	34.65	56.5618	0.0023	0	0.193664	0.313352	0.262674	0.76969	0.197324	0.31524	0.271914	0.261493	0	0	0	0	0	0	0	0	0	0	0	0	0	0.793651	0	3.65079	0	0	2.85714	0	0	0	0	0	0	0	0	0	0	0	0	6.34921	0
0.47	0.02	0.59	34.6	34.18	34.64	56.8968	-0.0098	2	0.207454	0.338328	0.262639	0.808421	0.198146	0.306117	0.280217	0.261493	0	0	0	0	0	0.10101	0	0	0	0	0	0	0	0.20202	0	16.1616	0	0	2.92929	0.30303	0	0	0	0	0	0	0	0	0	0	0	2.92929	0
																	1.39713	0.0909091	2.97587	1.95283	0.848576	0.953028	0.103093	0.0689655	0.0689655	3.59329	0.405405	0.635452	1.6495	1.64137	0.189036	55.5169	0.670509	0.211569	30.8832	18.3906	6.38426	0.610687	6.60006	2.60531	0.251342	0.0925926	1.31512	0.103093	0.00643501	0.01287	0.00643501	139.599	0.0763359
[truncated: 116 more columns]

## Sheet: Layer 0
Station	Hydrol. Zone	Temperature Av	Temperature Surface	Temperature 300 m	Salinity Av	Salinity Surface	Salinity 300 m	Latitude, S	Longitude, E	Light conditions	10S	11S	12S	Q4S	10L	11L	12L	Q4L	Acartia longiremis (Lilljeborg, 1853)	Aegistus dubius	Aetideopsis carinata Bradford, 1969	Aetideopsis rostrata Sars G.O., 1903	Aetideus acutus Farran, 1929	Aetideus armatus (Boeck, 1872)	Aetideus australis (Vervoort, 1957)	Aetideus giesbrechti Cleve, 1904	Amphipoda	Amphipoda Cyphocaris	Amphipoda Eupronoe	Amphipoda Hyperia	Amphipoda larvae	Amphipoda Phronima	Amphipoda Rhabdosoma	Amphipoda Scina	Amphipoda Streetsia	Amphipoda Themisto	Amphipoda Vibilia	Appendicularia	Bivalvia larvae	Bryozoa larvae	Calanoides acutus (Giesbrecht, 1902)	Calanus propinquus Brady, 1883	Calanus simillimus Giesbrecht, 1902	Calocalanus sp.	Calocalanus contractus Farran, 1926	Calocalanus pavo (Dana, 1852)	Calocalanus styliremis Giesbrecht, 1888	Calocalanus tenuis Farran, 1926	Candacia catula (Giesbrecht, 1889)
2206	1	18.79	18.81	15.2	35.54	35.62	35.43	34.4365	14.4093	2	0.339204	0.304788	0.19421	0.838202	0.682847	0.606046	0.416787	0.56856	2.02703	0	0	0	0	0	0	0.109395	0	0	0	0	0.202703	0.036465	0	0	0	0	0.371622	0.216109	0.0675676	0	0	0.182325	0.810811	0	0	0.472973	0.506757	0.036465	0
2208	1	19.26	19.28	13.57	35.58	35.58	35.18	35.02	14.0642	1	0.329714	0.333195	0.206422	0.869331	0.502769	0.45787	0.286098	0.415579	18.0064	0	0	0	0.932476	0	0	0	0	0	0	0	2.05788	0.353698	0	0	0	0	0.128617	0.610932	0.096463	0.0643087	0.0321543	0.96463	0	2.28296	1.41479	0	6.59164	5.5627	0
2210	1	18.7	18.7	15.29	35.62	35.62	35.44	35.6248	13.6818	2	0.324902	0.393015	0.191996	0.909913	0.332584	0.396252	0.226889	0.318575	2.55738	0	0	0	0.0679157	0	0	0.0983607	0	0	0	0	0.147541	0.238876	0.0327869	0	0.0327869	0	0.00468384	0.88993	0.0351288	0.100703	0	0.374707	0	0.229508	5.87354	0	0.599532	0.662763	0
2212	1	18.65	18.65	14.81	35.62	35.62	35.4	36.239	13.308	0	0.336162	0.390487	0.177014	0.903663	0.330853	0.39566	0.218029	0.314847	27.3377	0	0	0	0	0	0	0.0974026	0.519481	0	0	0.12987	0.487013	0.0974026	0	0.12987	0	0	0.0324675	1.07143	0	0.0974026	0.194805	1.72078	0	0	7.17532	0	5.48701	5.19481	0
2214	1	18.44	18.45	12.47	35.61	35.61	35.1	36.8322	12.9385	2	0.332075	0.342623	0.21406	0.888758	0.340843	0.378567	0.234217	0.317876	1.55063	0	0	0	0	0	0	0	0	0.0316456	0	0.0316456	0	0	0	0.0316456	0	0	0	0.0316456	0	0	0	0.348101	0	0	0.411392	0	0.189873	0	0
2216	1	17.37	17.39	11.42	35.59	35.6	35	37.4183	12.5513	1	0.313152	0.321509	0.303518	0.938179	0.350599	0.369087	0.283286	0.334324	0.966667	0	0	0	0	0	0	0	0	0	0	0	0	0.0666667	0	0	0	0	0	0.0666667	0	0	0	0.566667	0	0	0.4	0	0.0666667	0.133333	0
2218	1	15.75	15.75	8.85	35.2	35.2	34.6	37.9893	12.1565	2	0.296603	0.339582	0.38951	1.0257	0.348743	0.362456	0.333565	0.348255	0.192926	0	0	0	0	0.160772	0	0	0	0	0	0	0	0	0	0	0	0	0.0643087	0.321543	0	0	0	0.128617	0	0	4.791	0	0.546624	0.289389	0.0321543
2220	1	16.23	16.33	9.25	35.44	35.44	34.7	38.5898	11.7487	2	0.293287	0.351644	0.428409	1.07334	0.324049	0.362139	0.362168	0.349452	2.58278	0	0	0	0.0662252	0	0	0.0331126	0	0	0	0	0	0	0	0.0331126	0	0	0	17.0861	0	0.0662252	0.629139	0.165563	0	0	18.9735	0	0.496689	0.0662252	0
2222	1	16.56	16.56	11.34	35.57	35.57	34.89	39.1843	11.3302	2	0.272812	0.372144	0.424315	1.06927	0.28628	0.368093	0.367388	0.340587	17.1233	0	0	0	0.0342466	0	0	0	0.0342466	0	0	0.205479	0	0	0	0.0342466	0	0	0	3.32192	0.0684932	0.0342466	0	0.616438	0	0	12.6027	0	22.7055	0	0
2224	1	16.98	17.09	14.99	35.6	35.6	35.41	39.6823	10.9302	2	0.251796	0.390853	0.403351	1.046	0.262219	0.38552	0.361754	0.336498	4.02685	0	0.033557	0	0.503356	0	0	0	0.0671141	0	0	0.112176	0	0	0	0	0	0	0	1.04027	0.0671141	0.0671141	0	1.44295	0	0	5.76414	0	6.84564	0	0
2226	1	16.79	16.87	13.15	35.6	35.6	35.19	40.3775	10.532	1	0.254595	0.406448	0.402265	1.06331	0.248569	0.413025	0.362392	0.341329	29.2767	0	0	0	0.754717	0	0	0	0	0	0	0.116177	0	0	0	0	0	0	0.0314465	1.31901	0	0.0628931	0.116177	1.54874	0	0	13.2093	0	63.5884	0	0.0314465
2228	1	15.9	16.17	9.86	35.46	35.46	34.79	40.9778	10.0573	2	0.265559	0.36091	0.361892	0.988361	0.255078	0.406584	0.342722	0.334795	1.40468	0.143051	0	0	0	0.0334448	0	0	0	0	0	0.0913938	0	0.0731812	0	0	0	0	0	1.55932	0.0334448	0.0258287	0	0.280142	0	0	17.2569	0	2.44975	0	0
2230	2	16	16.04	9.4	35.45	35.43	34.73	41.5328	9.6432	0	0.268344	0.365122	0.331829	0.965295	0.279805	0.382256	0.32558	0.329214	4.22442	0.0990099	0	0	0	0.29703	0.19802	0	0	0	0.0660066	0	0	0	0	0	0	0	0.0330033	2.87129	0	0	0.165017	0.858086	0	0	14.2574	0	0.231023	0	0
2232	2	10.4	11.67	7.22	34.43	34.47	34.41	42.11	9.1905	2	0.274894	0.378159	0.334374	0.987427	0.298919	0.361494	0.307003	0.322472	0	0	0	0	0	0.759076	0	0	0	0	0	0.462046	0	0	0	0	0	0	0	14.5545	0	0	0	4.58746	0	0	11.7492	0.0330033	0	0	0
2234	2	10.46	11.48	6.79	34.38	34.39	34.37	42.6912	8.7402	0	0.318139	0.346154	0.291943	0.956236	0.301607	0.343966	0.288362	0.311312	0	0	0	0	0	0.728477	0	0	0	0.0331126	0	0.728477	0	0	0	0.0662252	0	0	0	126.523	0	0	0	6.49007	0.165563	0.0993377	3.70861	0	0	0	0
2236	2	9.92	11	7.61	34.38	34.4	34.43	43.2668	8.2662	2	0.300863	0.305001	0.252769	0.858633	0.300648	0.316247	0.271787	0.296227	0	0	0	0	0	0.291262	0	0	0	0	0	0.0970874	0	0	0	0	0	0	0	5.79288	0	0	0	2.03883	0.420712	0	1.00324	0	0	0	0
2238	3	10.26	10.72	7.18	34.49	34.51	34.42	43.8445	7.7982	0	0.313987	0.284463	0.244399	0.842849	0.291072	0.27958	0.283203	0.284618	0	0	0	0	0	0.443686	0	0	0	0	0	0.955631	0	0	0	0	0	0	0	10.1706	0	0	0	65.5631	0	0	17.6792	0	0	0	0.409556
2240	3	8.7	9.51	5.18	34.26	34.27	34.22	44.4175	7.326	2	0.310208	0.262123	0.35158	0.923911	0.281902	0.254952	0.302912	0.279922	0	0	0	0	0	0.365449	0	0	0	0	0	0.232558	0	0.0332226	0	0.0664452	0	0	0	452.492	0	0	0	6.01329	15.7475	0	0.498339	0	0	0	0
2242	4	7.46	7.63	4	33.86	33.84	34.14	44.9787	6.8065	0	0.274947	0.258623	0.426348	0.959918	0.26232	0.24935	0.326332	0.279334	0	0	0	0	0	0	0.522876	0	0	0	0	1.20915	0	0	0	0.0653595	0	0	0	30.8497	0.0653595	0	0.228758	0.0326797	3.49673	0	0	0	0	0	0
2244	4	6.81	7.16	3.66	33.8	33.8	34.12	45.6285	6.1333	2	0.215755	0.243366	0.378855	0.837976	0.228123	0.233776	0.342435	0.268111	0	0	0	0	0	0.666667	0	0	0	0	0	2.23333	0	0	0	0	0	0	0	18.9667	0	0	0.566667	0.2	18.5333	0	0	0	0	0	0
2246	4	7.14	7.4	3.44	33.74	33.77	34.11	46.0973	5.7627	0	0.200167	0.206945	0.350063	0.757175	0.206353	0.221844	0.328748	0.252315	0	0	0	0	0	0.135135	0	0	0	0	0	1.31757	0	0	0	0	0	0	0	71.4865	0.0337838	0	0.236486	0	12.1959	0	0	0	0	0	0
2247	4	6.73	7	3.66	33.74	33.77	34.12	46.3857	5.5047	1	0.193931	0.191607	0.346347	0.731885	0.198516	0.212112	0.320173	0.2436	0	0	0	0	0	0.166667	0	0	0	0	0	1.5	0	0	0	0	0	0	0	59.3	0.0333333	0	0.433333	0.133333	19.8	0	0	0	0	0	0
2249	4	6.81	7.2	3.77	33.84	33.83	34.12	46.9277	4.97	2	0.185835	0.179176	0.311946	0.676957	0.19388	0.203421	0.306689	0.234663	0	0	0	0	0	0	0	0	0	0	0	0.466667	0	0	0	0	0	0	0	4.23333	0	0	0.533333	0	2.63333	0	0	0	0	0	0
2251	4	7.1	7.09	3.68	33.8	33.8	34.12	47.4983	4.422	1	0.190792	0.192447	0.292075	0.675314	0.199685	0.206484	0.279501	0.228557	0	0	0	0	0	0	0	0	0	0	0	0.0655738	0	0.393443	0	0	0	0	0	37.7705	0	0	0.0655738	0	0.819672	0	0	0	0	0	0
2253	4	6.75	6.9	3.65	33.77	33.78	34.11	48.0575	3.996	2	0.205953	0.207589	0.258295	0.671837	0.221505	0.231312	0.278003	0.243607	0	0	0	0	0	0	0	0	0	0	0	0	0	0.326797	0	0	0	0	0	0.588235	0	0	0.353758	0	5.9902	0	0	0	0	0	0
2255	5	6.06	6.07	3.02	3376	33.78	34.12	48.5278	3.3028	2	0.243289	0.25495	0.261278	0.759517	0.246792	0.259978	0.295162	0.267311	0	0	0	0	0	0	0	0	0	0	0	0	0	0.0331126	0	0	0	0	0	0.331126	0	0	0	0	0.0993377	0	0	0	0	0	0
2257	5	4.91	5.12	2.42	33.79	33.79	34.16	49.1713	2.6988	0	0.301861	0.312211	0.329356	0.943428	0.287874	0.320756	0.357259	0.321963	0	0	0	0	0	0	0	0	0	0	0	0	0	0	0	0	0	0	0	0.246154	0	0	0	0	0.123077	0	0	0	0	0	0
2259	5	5.02	5.03	2.35	33.79	33.79	34.17	49.6893	2.0833	2	0.327668	0.33779	0.380892	1.04635	0.309779	0.358142	0.417213	0.361711	0	0	0	0	0	0	0	0.0338983	0	0	0	0.271186	0	0.0677966	0	0	0	0	0	6.74576	0.0677966	0	0.20339	0	7.79661	0	0	0	0	0	0
2261	5	4.95	5	2.6	33.79	33.78	34.13	50.2323	1.4103	0	0.336132	0.418804	0.437051	1.19199	0.322461	0.379327	0.464823	0.38887	0	0	0	0	0	0	0	0.0671141	0	0	0	0.234899	0	0.57047	0	0	0	0	0	7.51678	0.033557	0	0.33557	0	19.5973	0	0	0	0	0	0
2263	6	4.02	4.25	2.21	33.81	33.81	34.25	50.7673	0.8265	2	0.342936	0.422813	0.439515	1.20526	0.318344	0.370615	0.459215	0.382725	0	0	0	0	0	0	0	0.164474	0	0	0	0.0657895	0	0	0	0.0328947	0	0	0	30.1974	0	0	1.51316	0.0986842	20.5592	0	0	0	0	0	0
2266	6	2.87	2.87	1.88	33.71	33.71	34.44	51.6121	0.0022	2	0.328496	0.333954	0.341835	1.00428	0.274965	0.312815	0.412138	0.333306	0	0	0	0	0	0	0	0.0361345	0	0	0	0	0	0	0	0	0	0	0	0.1	0	0	1.68403	0.266667	2.23333	0	0	0	0	0	0
2268	6	2.91	2.9	1.94	33.73	33.74	34.47	52.2738	-0.0035	2	0.241795	0.25828	0.339747	0.839822	0.242411	0.288121	0.410098	0.313543	0	0	0	0	0	0	0	0.0671141	0	0	0	0.33557	0	0	0	0.167785	0	0	0	1.07383	0	0	5.2349	0.469799	4.19463	0	0	0	0	0	0
2270	6	0.88	0.92	1.6	33.77	33.77	34.58	52.9303	0.1833	0	0.205089	0.292813	0.391623	0.889525	0.211941	0.28628	0.405341	0.301187	0	0	0	0	0	0	0	0	1.56667	0	0	0.533333	0	0	0	0	0	0	0	0.166667	0	0	0.833333	1.3	1.16667	0	0	0	0	0	0
2272	7	1.25	1.29	1.61	33.74	33.75	34.58	53.5931	0.2667	2	0.199489	0.332301	0.380068	0.911858	0.215163	0.316798	0.397581	0.309847	0	0	0	0	0	0	0	0	0	0	0	0.533333	0	0	0	0	0	0	0	13.5	0	0	1.23333	5.03333	4.36667	0	0	0	0	0	0
2273	7	1.31	1.19	1.63	33.77	33.77	34.59	53.8925	0.0015	2	0.206167	0.334536	0.362735	0.903438	0.218494	0.32753	0.388488	0.311504	0	0	0	0	0	0	0	0.0660066	0	0	0	5.51155	0	0	0	0	0	0	0	0.165017	0	0	3.0363	3.86139	8.08581	0	0	0	0	0	0
2274	7	1.01	1.09	1.63	33.77	33.77	34.59	54.2507	-0.0027	2	0.214795	0.340452	0.344586	0.899833	0.22506	0.332617	0.357296	0.304991	0	0	0	0	0	0	0	0	0	0	0	2.18543	0	0	0	0	0	0	0	1.39073	0	0	2.64901	3.11258	13.9404	0	0	0	0	0	0
2275	7	0.43	0.58	1.28	33.81	33.81	34.51	54.5837	-0.0095	1	0.21994	0.338875	0.321379	0.880194	0.227361	0.332273	0.337191	0.298942	0	0	0	0.0337838	0	0.0337838	0	0	0	0	0	0.912162	0	0	0	0.0337838	0	0	0	8.61486	0	0	0.743243	1.38514	4.59459	0	0	0	0	0	0
2277	7	0.23	0.37	1.81	33.82	33.81	34.56	55.2412	0.003	1	0.213673	0.318484	0.279612	0.811769	0.220817	0.327453	0.302775	0.283682	0	0	0	0	0	0	0	0	0	0	0	0.196721	0	0	0	0.0327869	0	0	0	8.68852	0	0	2.16393	0.295082	1.80328	0	0	0	0	0	0
2278	8	0.2	0.3	1.5	33.88	33.89	34.55	55.5677	0.0022	2	0.204518	0.315734	0.280917	0.801169	0.211703	0.32137	0.280533	0.271202	0	0	0	0	0	0.033557	0	0	0	0	0	0.268456	0	0	0	0.033557	0	0	0	4.0604	0	0	1.4094	0.33557	1.1745	0	0	0	0	0	0
2279	8	0.1	0.3	1.45	33.93	33.91	34.59	55.8997	0.0013	2	0.193583	0.313545	0.278399	0.785527	0.204613	0.315773	0.269889	0.263425	0	0	0	0	0	0.0334448	0	0	0	0	0	0	0	0	0	0.0668896	0	0.267559	0	28.495	0	0	2.94314	0.802676	1.50502	0	0	0	0	0	0
2280	9	0.16	0.29	0.5	34.09	34.04	34.57	56.2222	0.0023	1	0.188629	0.313314	0.267229	0.769172	0.199098	0.314115	0.270152	0.261122	0	0	0	0	0	0	0	0	0	0	0	0	0	0	0	0.0322581	0	0.16129	0	10.0968	0	0	4	1.35484	0.516129	0	0	0	0	0	0
2281	9	0.1	0.2	0.83	34.14	34.14	34.65	56.5618	0.0023	0	0.193664	0.313352	0.262674	0.76969	0.197324	0.31524	0.271914	0.261493	0	0	0	0	0	0	0	0	0	0	0	0	0	0	0	0.0666667	0	0.538095	0	14.7286	0	0	1.75714	3.23333	0.3	0	0	0	0	0	0
2282	9	0.47	0.02	0.59	34.6	34.18	34.64	56.8968	-0.0098	2	0.207454	0.338328	0.262639	0.808421	0.198146	0.306117	0.280217	0.261493	0	0	0	0	0	0	0	0.0334448	0	0	0	0	0	0	0	0	0	0.133779	0	12.776	0	0	1.03679	1.43813	0.234114	0	0	0	0	0	0
																			111.277	0.242061	0.033557	0.0337838	2.35894	4.14845	0.720896	0.806457	2.18751	0.0647582	0.0660066	21.0033	2.89513	2.29113	0.0327869	0.893527	0.0327869	1.10072	0.666149	1012.03	0.602042	0.518721	34.3319	117.244	172.904	2.6118	136.769	0.505976	110.305	11.9457	0.473157
																			0.256016	0.00055691	7.72048e-05	7.77264e-05	0.00542721	0.00954435	0.00165857	0.00185542	0.0050328	0.000148989	0.000151861	0.0483223	0.00666084	0.00527121	7.54328e-05	0.00205574	7.54328e-05	0.00253244	0.00153261	2.32837	0.00138512	0.00119342	0.0789874	0.269743	0.397802	0.00600898	0.314664	0.0011641	0.253779	0.0274835	0.00108859
[truncated: 146 more columns]

## Sheet: Layers 1-2-3 Normalized
Layer	Station	Temperature Av	Temperature Surface	Temperature 300 m	Salinity Av	Salinity Surface	Salinity 300 m	Latitude, S	Longitude, E	Light conditions	10S	11S	12S	Q4S	10L	11L	12L	Q4L		Acartia longiremis (Lilljeborg, 1853)	Aegistus dubius	Aetideopsis carinata Bradford, 1969	Aetideopsis rostrata Sars G.O., 1903	Aetideus acutus Farran, 1929	Aetideus armatus (Boeck, 1872)	Aetideus australis (Vervoort, 1957)	Aetideus giesbrechti Cleve, 1904	Amphipoda	Amphipoda Cyphocaris	Amphipoda Eupronoe	Amphipoda Hyperia	Amphipoda larvae	Amphipoda Phronima	Amphipoda Rhabdosoma	Amphipoda Scina	Amphipoda Streetsia	Amphipoda Themisto	Amphipoda Vibilia	Appendicularia	Bivalvia larvae	Bryozoa larvae	Calanoides acutus (Giesbrecht, 1902)	Calanus propinquus Brady, 1883	Calanus simillimus Giesbrecht, 1902	Calocalanus sp.	Calocalanus contractus Farran, 1926	Calocalanus pavo (Dana, 1852)	Calocalanus styliremis Giesbrecht, 1888	Calocalanus tenuis Farran, 1926
1	2206	18.79	18.81	15.2	35.54	35.62	35.43	34.4365	14.4093	2	0.339204	0.304788	0.19421	0.838202	0.682847	0.606046	0.416787	0.56856		0	0	0	0	0	0	0	0.00574713	0	0	0	0	0	0.00191571	0	0	0	0	0	0.00957854	0	0	0	0.00957854	0	0	0	0	0	0.00191571
1	2208	19.26	19.28	13.57	35.58	35.58	35.18	35.02	14.0642	1	0.329714	0.333195	0.206422	0.869331	0.502769	0.45787	0.286098	0.415579		0.054515	0	0	0	0	0	0	0	0	0	0	0	0.000139782	0.000838692	0	0	0	0	0.000279564	0.000419346	0.000279564	0.000139782	0.000139782	0.000559128	0	0.00880626	0	0	0.0259994	0.0234834
1	2210	18.7	18.7	15.29	35.62	35.62	35.44	35.6248	13.6818	2	0.324902	0.393015	0.191996	0.909913	0.332584	0.396252	0.226889	0.318575		0.0869565	0	0	0	0	0	0	0	0	0	0	0	0	0	0	0	0	0	0	0.0217391	0	0	0	0	0	0	0.0869565	0	0.0543478	0.119565
1	2212	18.65	18.65	14.81	35.62	35.62	35.4	36.239	13.308	0	0.336162	0.390487	0.177014	0.903663	0.330853	0.39566	0.218029	0.314847		0.119269	0	0	0	0	0	0	0	0	0	0	0.000186359	0	0	0	0	0	0	0	0.00447261	0	0	0	0.00130451	0	0	0.0193813	0	0.00372717	0.0298174
1	2214	18.44	18.45	12.47	35.61	35.61	35.1	36.8322	12.9385	2	0.332075	0.342623	0.21406	0.888758	0.340843	0.378567	0.234217	0.317876		0.48	0	0	0	0	0	0	0	0	0	0	0	0	0	0	0	0	0	0	0	0	0	0	0	0	0	0.02	0	0	0
1	2216	17.37	17.39	11.42	35.59	35.6	35	37.4183	12.5513	1	0.313152	0.321509	0.303518	0.938179	0.350599	0.369087	0.283286	0.334324		0.0735294	0	0	0	0	0	0	0	0	0	0	0	0	0.00294118	0	0	0	0	0	0.00294118	0	0	0	0	0	0	0.0176471	0	0	0.00294118
1	2218	15.75	15.75	8.85	35.2	35.2	34.6	37.9893	12.1565	2	0.296603	0.339582	0.38951	1.0257	0.348743	0.362456	0.333565	0.348255		0.00322928	0	0	0	0	0	0	0	0	0	0	0	0	0	0	0	0	0	0.00107643	0.000538213	0	0	0	0	0	0	0.0134553	0	0.00538213	0.000538213
1	2220	16.23	16.33	9.25	35.44	35.44	34.7	38.5898	11.7487	2	0.293287	0.351644	0.428409	1.07334	0.324049	0.362139	0.362168	0.349452		0.0064114	0	0	0	0	0	0	0	0	0	0	0	0	0	0	0	0	0	0	0.0427427	0	0	0.00160285	0	0	0	0.0373998	0	0.000890472	0
1	2222	16.56	16.56	11.34	35.57	35.57	34.89	39.1843	11.3302	2	0.272812	0.372144	0.424315	1.06927	0.28628	0.368093	0.367388	0.340587		0.113287	0	0	0	0	0	0	0	0	0	0	0.0013986	0	0	0	0	0	0	0	0.00769231	0	0	0	0	0	0	0.0503497	0	0.00699301	0
1	2224	16.98	17.09	14.99	35.6	35.6	35.41	39.6823	10.9302	2	0.251796	0.390853	0.403351	1.046	0.262219	0.38552	0.361754	0.336498		0.250645	0	0	0	0	0	0	0	0	0	0	0.00171871	0	0	0	0	0	0	0	0	0	0	0	0	0	0	0.0189058	0	0	0
1	2226	16.79	16.87	13.15	35.6	35.6	35.19	40.3775	10.532	1	0.254595	0.406448	0.402265	1.06331	0.248569	0.413025	0.362392	0.341329		0.05704	0	0	0	0	0	0	0	0	0	0	4.30556e-05	0	0	0	0	0	0	0	0.000430556	0	0	4.30556e-05	0.0003875	0	0	0.0150694	0	0.0378889	0
1	2228	15.9	16.17	9.86	35.46	35.46	34.79	40.9778	10.0573	2	0.265559	0.36091	0.361892	0.988361	0.255078	0.406584	0.342722	0.334795		0.0120068	0.000927258	0	0	0	0	0	0	0	0	0	0.000463629	0	0	0	0	0	0	0	0.00440447	0	0.000231814	0	0	0	0	0.116834	0	0.018777	0
1	2230	16	16.04	9.4	35.45	35.43	34.73	41.5328	9.6432	0	0.268344	0.365122	0.331829	0.965295	0.279805	0.382256	0.32558	0.329214		0.0195719	0.000458716	0	0	0	0	0	0	0	0	0	0	0	0	0	0	0	0	0	0.0122324	0	0	0.000764526	0.00122324	0	0	0.0636086	0	0	0
1	2232	10.4	11.67	7.22	34.43	34.47	34.41	42.11	9.1905	2	0.274894	0.378159	0.334374	0.987427	0.298919	0.361494	0.307003	0.322472		0	0	0	0	0	0	0	0	0	0	0	0.000201364	0	0	0	0	0	0	0	0.00934902	0	0	0	5.75324e-05	0	0	0.0101257	0	0	0
1	2234	10.46	11.48	6.79	34.38	34.39	34.37	42.6912	8.7402	0	0.318139	0.346154	0.291943	0.956236	0.301607	0.343966	0.288362	0.311312		0	0	0	0	0	0	0	0	0	0	0	0.000232836	0	0	0	0	0	0	0	0.0430746	0	0	0	0.00283768	5.82089e-05	4.36567e-05	0.00145522	0	0	0
1	2236	9.92	11	7.61	34.38	34.4	34.43	43.2668	8.2662	2	0.300863	0.305001	0.252769	0.858633	0.300648	0.316247	0.271787	0.296227		0	0	0	0	0	0	0	0	0	0	0	0.000249004	0	0	0	0	0	0	0	0.00473108	0	0	0	0	0	0	0.00398406	0	0	0
1	2238	10.26	10.72	7.18	34.49	34.51	34.42	43.8445	7.7982	0	0.313987	0.284463	0.244399	0.842849	0.291072	0.27958	0.283203	0.284618		0	0	0	0	0	0	0	0	0	0	0	0.00195401	0	0	0	0	0	0	0	0.0210431	0	0	0	0.114234	0	0	0.0263039	0	0	0
1	2240	8.7	9.51	5.18	34.26	34.27	34.22	44.4175	7.326	2	0.310208	0.262123	0.35158	0.923911	0.281902	0.254952	0.302912	0.279922		0	0	0	0	0	1.82745e-05	0	0	0	0	0	0.000109647	0	0	0	0	0	0	0	0.247072	0	0	0	0.00283255	0.00858902	0	0.000255843	0	0	0
1	2242	7.46	7.63	4	33.86	33.84	34.14	44.9787	6.8065	0	0.274947	0.258623	0.426348	0.959918	0.26232	0.24935	0.326332	0.279334		0	0	0	0	0	0	0	0	0	0	0	0.00238141	0	0	0	0	0	0	0	0.060964	0	0	0.000571537	9.52562e-05	0.00952562	0	0	0	0	0
1	2244	6.81	7.16	3.66	33.8	33.8	34.12	45.6285	6.1333	2	0.215755	0.243366	0.378855	0.837976	0.228123	0.233776	0.342435	0.268111		0	0	0	0	0	0	0	0	0	0	0	0.00261152	0	0	0	0	0	0	0	0.0237154	0	0	0.000917561	0	0.00564653	0	0	0	0	0
1	2246	7.14	7.4	3.44	33.74	33.77	34.11	46.0973	5.7627	0	0.200167	0.206945	0.350063	0.757175	0.206353	0.221844	0.328748	0.252315		0	0	0	0	0	0	0	0	0	0	0	0.00103863	0	0	0	0	0	0	0	0.0648895	0	0	0	0	0.00291805	0	0	0	0	0
1	2247	6.73	7	3.66	33.74	33.77	34.12	46.3857	5.5047	1	0.193931	0.191607	0.346347	0.731885	0.198516	0.212112	0.320173	0.2436		0	0	0	0	0	0	0	0	0	0	0	0.00105077	0	0	0	0	0	0	0	0.070612	0	0	0.000126093	0	0.0222764	0	0	0	0	0
1	2249	6.81	7.2	3.77	33.84	33.83	34.12	46.9277	4.97	2	0.185835	0.179176	0.311946	0.676957	0.19388	0.203421	0.306689	0.234663		0	0	0	0	0	0	0	0	0	0	0	0.0041958	0	0	0	0	0	0	0	0.041958	0	0	0.00559441	0	0.0258741	0	0	0	0	0
1	2251	7.1	7.09	3.68	33.8	33.8	34.12	47.4983	4.422	1	0.190792	0.192447	0.292075	0.675314	0.199685	0.206484	0.279501	0.228557		0	0	0	0	0	0	0	0	0	0	0	0	0	0.00337079	0	0	0	0	0	0.319101	0	0	0.000561798	0	0.00674157	0	0	0	0	0
1	2253	6.75	6.9	3.65	33.77	33.78	34.11	48.0575	3.996	2	0.205953	0.207589	0.258295	0.671837	0.221505	0.231312	0.278003	0.243607		0	0	0	0	0	0	0	0	0	0	0	0	0	0.00110546	0	0	0	0	0	0.00198983	0	0	0.000773823	0	0.0185717	0	0	0	0	0
1	2255	6.06	6.07	3.02	3376	33.78	34.12	48.5278	3.3028	2	0.243289	0.25495	0.261278	0.759517	0.246792	0.259978	0.295162	0.267311		0	0	0	0	0	0	0	0	0	0	0	0	0	0.0045045	0	0	0	0	0	0.0315315	0	0	0	0	0	0	0	0	0	0
1	2257	4.91	5.12	2.42	33.79	33.79	34.16	49.1713	2.6988	0	0.301861	0.312211	0.329356	0.943428	0.287874	0.320756	0.357259	0.321963		0	0	0	0	0	0	0	0	0	0	0	0	0	0	0	0	0	0	0	0.00687876	0	0	0	0	0.00343938	0	0	0	0	0
1	2259	5.02	5.03	2.35	33.79	33.79	34.17	49.6893	2.0833	2	0.327668	0.33779	0.380892	1.04635	0.309779	0.358142	0.417213	0.361711		0	0	0	0	0	0	0	0	0	0	0	0.00036912	0	0	0	0	0	0	0	0.010019	0	0	0	0	0.000421852	0	0	0	0	0
1	2261	4.95	5	2.6	33.79	33.78	34.13	50.2323	1.4103	0	0.336132	0.418804	0.437051	1.19199	0.322461	0.379327	0.464823	0.38887		0	0	0	0	0	0	0	0	0	0	0	0	0	0.000367282	0	0	0	0	0	0.00453701	0	0	2.16048e-05	0	0.0114505	0	0	0	0	0
1	2263	4.02	4.25	2.21	33.81	33.81	34.25	50.7673	0.8265	2	0.342936	0.422813	0.439515	1.20526	0.318344	0.370615	0.459215	0.382725		0	0	0	0	0	0	0	0	0	0	0	3.55284e-05	0	0	0	0	0	0	0	0.00346402	0	0	0.000426341	0	0.0103032	0	0	0	0	0
1	2266	2.87	2.87	1.88	33.71	33.71	34.44	51.6121	0.0022	2	0.328496	0.333954	0.341835	1.00428	0.274965	0.312815	0.412138	0.333306		0	0	0	0	0	0	0	0.000352485	0	0	0	0	0	0	0	0	0	0	0	0	0	0	0.0105746	0	0	0	0	0	0	0
1	2268	2.91	2.9	1.94	33.73	33.74	34.47	52.2738	-0.0035	2	0.241795	0.25828	0.339747	0.839822	0.242411	0.288121	0.410098	0.313543		0	0	0	0	0	0	0	0	0	0	0	0.000119442	0	0	0	0	0	0	0	0.000432978	0	0	0.00161247	0.000119442	0.00173191	0	0	0	0	0
1	2270	0.88	0.92	1.6	33.77	33.77	34.58	52.9303	0.1833	0	0.205089	0.292813	0.391623	0.889525	0.211941	0.28628	0.405341	0.301187		0	0	0	0	0	0	0	0	0.000838298	0	0	0.000214033	0	0	0	0	0	0	0	0	0	0	0.000285378	0.000659937	0.000481575	0	0	0	0	0
1	2272	1.25	1.29	1.61	33.74	33.75	34.58	53.5931	0.2667	2	0.199489	0.332301	0.380068	0.911858	0.215163	0.316798	0.397581	0.309847		0	0	0	0	0	0	0	0	0	0	0	0.00031501	0	0	0	0	0	0	0	0.0105003	0	0	0.000577519	0.00147005	0.000866278	0	0	0	0	0
1	2273	1.31	1.19	1.63	33.77	33.77	34.59	53.8925	0.0015	2	0.206167	0.334536	0.362735	0.903438	0.218494	0.32753	0.388488	0.311504		0	0	0	0	0	0	0	0	0	0	0	0.00349127	0	0	0	0	0	0	0	8.31255e-05	0	0	0.00232751	0.00243835	0.00620671	0	0	0	0	0
1	2274	1.01	1.09	1.63	33.77	33.77	34.59	54.2507	-0.0027	2	0.214795	0.340452	0.344586	0.899833	0.22506	0.332617	0.357296	0.304991		0	0	0	0	0	0	0	0	0	0	0	0.000862069	0	0	0	0	0	0	0	0.00153941	0	0	0.00431034	0.000184729	0.0246305	0	0	0	0	0
1	2275	0.43	0.58	1.28	33.81	33.81	34.51	54.5837	-0.0095	1	0.21994	0.338875	0.321379	0.880194	0.227361	0.332273	0.337191	0.298942		0	0	0	2.06271e-05	0	0	0	0	0	0	0	0.000474422	0	0	0	0	0	0	0	0.00346535	0	0	8.25083e-05	0.000763201	0.00237211	0	0	0	0	0
1	2277	0.23	0.37	1.81	33.82	33.81	34.56	55.2412	0.003	1	0.213673	0.318484	0.279612	0.811769	0.220817	0.327453	0.302775	0.283682		0	0	0	0	0	0	0	0	0	0	0	7.35727e-05	0	0	0	0	0	0	0	0.00156955	0	0	0.000220718	0.000196194	0.0008093	0	0	0	0	0
1	2278	0.2	0.3	1.5	33.88	33.89	34.55	55.5677	0.0022	2	0.204518	0.315734	0.280917	0.801169	0.211703	0.32137	0.280533	0.271202		0	0	0	0	0	0	0	0	0	0	0	0.0001837	0	0	0	0	0	0	0	0.0020207	0	0	0.000979732	0.000428633	0.00140836	0	0	0	0	0
1	2279	0.1	0.3	1.45	33.93	33.91	34.59	55.8997	0.0013	2	0.193583	0.313545	0.278399	0.785527	0.204613	0.315773	0.269889	0.263425		0	0	0	0	0	0	0	0	0	0	0	0	0	0	0	0	0	0	0	0.0102162	0	0	0	0.000510812	0.0011919	0	0	0	0	0
1	2280	0.16	0.29	0.5	34.09	34.04	34.57	56.2222	0.0023	1	0.188629	0.313314	0.267229	0.769172	0.199098	0.314115	0.270152	0.261122		0	0	0	0	0	0	0	0	0	0	0	0	0	0	0	0	0	0.000838223	0	0.0071249	0	0	0.000838223	0.00461023	0.00251467	0	0	0	0	0
1	2281	0.1	0.2	0.83	34.14	34.14	34.65	56.5618	0.0023	0	0.193664	0.313352	0.262674	0.76969	0.197324	0.31524	0.271914	0.261493		0	0	0	0	0	0	0	0	0	0	0	0	0	0	0	0	0	0.000243784	0	0.00219405	0	0	0	0.0226719	0.0014627	0	0	0	0	0
1	2282	0.01	0.02	0.59	34.19	34.18	34.64	56.8968	-0.0098	2	0.207454	0.338328	0.262639	0.808421	0.198146	0.306117	0.280217	0.261493		0	0	0	0	0	0	0	0	0	0	0	0	0	0	0	0	0	0	0	0.0449827	0	0	0	0.0276817	0.0242215	0	0	0	0	0
2	2206	17.9	18.81	15.2	35.54	35.62	35.43	34.4365	14.4093	2	0.339204	0.304788	0.19421	0.838202	0.682847	0.606046	0.416787	0.56856		0.0207828	0	0	0	0	0	0	0	0	0	0	0	0.00207828	0	0	0	0	0	0.00381018	0.00034638	0.000692761	0	0	0	0.00831313	0	0	0.00484932	0.0051957	0
2	2208	17.18	19.28	13.57	35.53	35.58	35.18	35.02	14.0642	1	0.329714	0.333195	0.206422	0.869331	0.502769	0.45787	0.286098	0.415579		0.0330319	0	0	0	0.00570193	0	0	0	0	0	0	0	0.0123869	0.000786473	0	0	0	0	0.000393236	0.000393236	0.000196618	0.000196618	0	0.00393236	0	0	0.0086512	0	0.00353913	0.000589855
2	2210	18	18.7	15.29	35.59	35.62	35.44	35.6248	13.6818	2	0.324902	0.393015	0.191996	0.909913	0.332584	0.396252	0.226889	0.318575		0.0114829	0	0	0	0	0	0	0.000593942	0	0	0	0	0	0.00138586	0.000197981	0	0.000197981	0	0	0.00494951	0.000197981	0.000593942	0	0.00197981	0	0.00138586	0.0332607	0	0.00237577	0.00178183
2	2212	18.09	18.65	14.81	35.6	35.62	35.4	36.239	13.308	0	0.336162	0.390487	0.177014	0.903663	0.330853	0.39566	0.218029	0.314847		0.0282486	0	0	0	0	0	0	0	0.00225989	0	0	0.000423729	0.00211864	0.000282486	0	0.000423729	0	0	0	0	0	0.000423729	0.000847458	0.00649718	0	0	0.0163842	0	0.019774	0
2	2214	16.15	18.45	12.47	35.5	35.61	35.1	36.8322	12.9385	2	0.332075	0.342623	0.21406	0.888758	0.340843	0.378567	0.234217	0.317876		0.034153	0	0	0	0	0	0	0	0	0	0	0.00136612	0	0	0	0	0	0	0	0	0	0	0	0.00136612	0	0	0.0136612	0	0.00819672	0
2	2216	14.29	17.39	11.42	35.29	35.6	35	37.4183	12.5513	1	0.313152	0.321509	0.303518	0.938179	0.350599	0.369087	0.283286	0.334324		0.00232423	0	0	0	0	0	0	0	0	0	0	0	0	0	0	0	0	0	0	0.000581058	0	0	0	0.00813481	0	0	0.00290529	0	0.00116212	0.00174317
2	2218	11.85	15.75	8.85	34.87	35.2	34.6	37.9893	12.1565	2	0.296603	0.339582	0.38951	1.0257	0.348743	0.362456	0.333565	0.348255		0	0	0	0	0	0	0	0	0	0	0	0	0	0	0	0	0	0	0	0.00345871	0	0	0	0	0	0	0.0518807	0	0.00259403	0.00345871
2	2220	12.73	16.33	9.25	35.07	35.44	34.7	38.5898	11.7487	2	0.293287	0.351644	0.428409	1.07334	0.324049	0.362139	0.362168	0.349452		0.00129646	0	0	0	0.000216076	0	0	0	0	0	0	0	0	0	0	0	0	0	0	0.00734659	0	0.000432152	0.000216076	0	0	0	0.0324114	0	0.000864304	0.000432152
2	2222	14.55	16.56	11.34	35.28	35.57	34.89	39.1843	11.3302	2	0.272812	0.372144	0.424315	1.06927	0.28628	0.368093	0.367388	0.340587		0.0119508	0	0	0	0	0	0	0	0	0	0	0.000135805	0	0	0	0	0	0	0	0.00434576	0.000135805	0	0	0.000950635	0	0	0.0152102	0	0.0434576	0
2	2224	16.89	17.09	14.99	35.6	35.6	35.41	39.6823	10.9302	2	0.251796	0.390853	0.403351	1.046	0.262219	0.38552	0.361754	0.336498		0.00887087	0	0	0	0	0	0	0	0.000253453	0	0	0.000253453	0	0	0	0	0	0	0	0.00240781	0.000126727	0.000253453	0	0.000126727	0	0	0.0202763	0	0.0253453	0
2	2226	16.7	16.87	13.15	35.59	35.6	35.19	40.3775	10.532	1	0.254595	0.406448	0.402265	1.06331	0.248569	0.413025	0.362392	0.341329		0.000481255	0	0	0	0	0	0	0	0	0	0	4.81255e-05	0	0	0	0	0	0	0	0.00096251	0	0	9.6251e-05	0.00101064	0	0	0.00601569	0	0.0673757	0
2	2228	13.31	16.17	9.86	35.16	35.46	34.79	40.9778	10.0573	2	0.265559	0.36091	0.361892	0.988361	0.255078	0.406584	0.342722	0.334795		0.000184502	0.000109605	0	0	0	0	0	0	0	0	0	0.000109605	0	0.000109605	0	0	0	0	0	0.0023017	0	0	0	0.00021921	0	0	0.0115085	0	0.000986444	0
2	2230	12	16.04	9.4	35.11	35.43	34.73	41.5328	9.6432	0	0.268344	0.365122	0.331829	0.965295	0.279805	0.382256	0.32558	0.329214		0	0	0	0	0	0.00392328	0	0	0	0	0.00043592	0	0	0	0	0	0	0	0	0.0021796	0	0	0	0.00043592	0	0	0	0	0	0
2	2232	8.2	11.67	7.22	34.39	34.47	34.41	42.11	9.1905	2	0.274894	0.378159	0.334374	0.987427	0.298919	0.361494	0.307003	0.322472		0	0	0	0	0	0.0014434	0	0	0	0	0	0.000481133	0	0	0	0	0	0	0	0.00721699	0	0	0	0.00859166	0	0	6.87332e-05	6.87332e-05	0	0
2	2234	8.21	11.48	6.79	34.39	34.39	34.37	42.6912	8.7402	0	0.318139	0.346154	0.291943	0.956236	0.301607	0.343966	0.288362	0.311312		0	0	0	0	0	0.00196409	0	0	0	9.35279e-05	0	0.000561167	0	0	0	9.35279e-05	0	0	0	0.0785634	0	0	0	9.35279e-05	9.35279e-05	0	0.000841751	0	0	0
2	2236	8.55	11	7.61	34.4	34.4	34.43	43.2668	8.2662	2	0.300863	0.305001	0.252769	0.858633	0.300648	0.316247	0.271787	0.296227		0	0	0	0	0	0	0	0	0	0	0	0.000405762	0	0	0	0	0	0	0	0.0292149	0	0	0	0	0.00263745	0	0.00304321	0	0	0
2	2238	9.04	10.72	7.18	34.54	34.51	34.42	43.8445	7.7982	0	0.313987	0.284463	0.244399	0.842849	0.291072	0.27958	0.283203	0.284618		0	0	0	0	0	0.00198774	0	0	0	0	0	0.000165645	0	0	0	0	0	0	0	0.00248468	0	0	0	0.0662581	0	0	0.0278284	0	0	0
2	2240	6.99	9.51	5.18	34.25	34.27	34.22	44.4175	7.326	2	0.310208	0.262123	0.35158	0.923911	0.281902	0.254952	0.302912	0.279922		0	0	0	0	0	0.00189573	0	0	0	0	0	0.000189573	0	0.000189573	0	0	0	0	0	0.0166825	0	0	0	0.00492891	0.000379147	0	0.000189573	0	0	0
2	2242	5.71	7.63	4	33.97	33.84	34.14	44.9787	6.8065	0	0.274947	0.258623	0.426348	0.959918	0.26232	0.24935	0.326332	0.279334		0	0	0	0	0	0	0.00160829	0	0	0	0	0.00142959	0	0	0	0	0	0	0	0.0357398	0	0	0	0	0.000893495	0	0	0	0	0
2	2244	4.76	7.16	3.66	33.84	33.8	34.12	45.6285	6.1333	2	0.215755	0.243366	0.378855	0.837976	0.228123	0.233776	0.342435	0.268111		0	0	0	0	0	0.00189789	0	0	0	0	0	0.00246726	0	0	0	0	0	0	0	0.0189789	0	0	0.000189789	0.000569368	0.0446005	0	0	0	0	0
2	2246	5.2	7.4	3.44	33.79	33.77	34.11	46.0973	5.7627	0	0.200167	0.206945	0.350063	0.757175	0.206353	0.221844	0.328748	0.252315		0	0	0	0	0	7.93273e-05	0	0	0	0	0	0.00118991	0	0	0	0	0	0	0	0.0571157	7.93273e-05	0	0.000396637	0	0.0237982	0	0	0	0	0
2	2247	4.61	7	3.66	33.81	33.77	34.12	46.3857	5.5047	1	0.193931	0.191607	0.346347	0.731885	0.198516	0.212112	0.320173	0.2436		0	0	0	0	0	0.000552975	0	0	0	0	0	0.00143774	0	0	0	0	0	0	0	0.00973236	0	0	0.00088476	0.00044238	0.00685689	0	0	0	0	0
2	2249	4.98	7.2	3.77	33.92	33.83	34.12	46.9277	4.97	2	0.185835	0.179176	0.311946	0.676957	0.19388	0.203421	0.306689	0.234663		0	0	0	0	0	0	0	0	0	0	0	0	0	0	0	0	0	0	0	0.00591716	0	0	0	0	0.00591716	0	0	0	0	0
2	2251	5.31	7.09	3.68	33.93	33.8	34.12	47.4983	4.422	1	0.190792	0.192447	0.292075	0.675314	0.199685	0.206484	0.279501	0.228557		0	0	0	0	0	0	0	0	0	0	0	0	0	0	0	0	0	0	0	0.0151057	0	0	0	0	0.00100705	0	0	0	0	0
2	2253	4.35	6.9	3.65	33.9	33.78	34.11	48.0575	3.996	2	0.205953	0.207589	0.258295	0.671837	0.221505	0.231312	0.278003	0.243607		0	0	0	0	0	0	0	0	0	0	0	0	0	0	0	0	0	0	0	0	0	0	0.00819672	0	0.0327869	0	0	0	0	0
2	2255	4.23	6.07	3.02	33.86	33.78	34.12	48.5278	3.3028	2	0.243289	0.25495	0.261278	0.759517	0.246792	0.259978	0.295162	0.267311		0	0	0	0	0	0	0	0	0	0	0	0	0	0	0	0	0	0	0	0.0110294	0	0	0	0	0.0110294	0	0	0	0	0
2	2257	3.11	5.12	2.42	33.89	33.79	34.16	49.1713	2.6988	0	0.301861	0.312211	0.329356	0.943428	0.287874	0.320756	0.357259	0.321963		0	0	0	0	0	0	0	0	0	0	0	0	0	0	0	0	0	0	0	0	0	0	0	0	0	0	0	0	0	0
2	2259	3.35	5.03	2.35	33.88	33.79	34.17	49.6893	2.0833	2	0.327668	0.33779	0.380892	1.04635	0.309779	0.358142	0.417213	0.361711		0	0	0	0	0	0	0	0.000168294	0	0	0	0.000168294	0	0	0	0	0	0	0	0.00151464	0	0	0	0	0.0363514	0	0	0	0	0
2	2261	3.47	5	2.6	33.86	33.78	34.13	50.2323	1.4103	0	0.336132	0.418804	0.437051	1.19199	0.322461	0.379327	0.464823	0.38887		0	0	0	0	0	0	0	0.000296956	0	0	0	0.000593912	0	0	0	0	0	0	0	0.00163326	0	0	0.000296956	0	0.0074239	0	0	0	0	0
2	2263	1.78	4.25	2.21	33.95	33.81	34.25	50.7673	0.8265	2	0.342936	0.422813	0.439515	1.20526	0.318344	0.370615	0.459215	0.382725		0	0	0	0	0	0	0	0.00022913	0	0	0	0	0	0	0	7.63767e-05	0	0	0	0.0537692	0	0	0.00152753	7.63767e-05	0.00305507	0	0	0	0	0
2	2266	1.32	2.87	1.88	33.88	33.71	34.44	51.6121	0.0022	2	0.328496	0.333954	0.341835	1.00428	0.274965	0.312815	0.412138	0.333306		0	0	0	0	0	0	0	0	0	0	0	0	0	0	0	0	0	0	0	0.000187453	0	0	0.00112472	0.000499875	0.00418645	0	0	0	0	0
2	2268	1.44	2.9	1.94	33.95	33.74	34.47	52.2738	-0.0035	2	0.241795	0.25828	0.339747	0.839822	0.242411	0.288121	0.410098	0.313543		0	0	0	0	0	0	0	4.67814e-05	0	0	0	9.35629e-05	0	0	0	0	0	0	0	0	0	0	0.00098241	0.000280689	0.000421033	0	0	0	0	0
2	2270	0.24	0.92	1.6	34.06	33.77	34.58	52.9303	0.1833	0	0.205089	0.292813	0.391623	0.889525	0.211941	0.28628	0.405341	0.301187		0	0	0	0	0	0	0	0	0	0	0	0.000726041	0	0	0	0	0	0	0	0.000968054	0	0	0.000968054	0.000484027	0.00169409	0	0	0	0	0
2	2272	0.14	1.29	1.61	34.03	33.75	34.58	53.5931	0.2667	2	0.199489	0.332301	0.380068	0.911858	0.215163	0.316798	0.397581	0.309847		0	0	0	0	0	0	0	0	0	0	0	5.37115e-05	0	0	0	0	0	0	0	0.000134279	0	0	0.000268557	0.00241702	0.00255129	0	0	0	0	0
2	2273	0.31	1.19	1.63	34.04	33.77	34.59	53.8925	0.0015	2	0.206167	0.334536	0.362735	0.903438	0.218494	0.32753	0.388488	0.311504		0	0	0	0	0	0	0	8.65913e-05	0	0	0	0.00177512	0	0	0	0	0	0	0	8.65913e-05	0	0	0.000173183	0.000736026	0.000822618	0	0	0	0	0
2	2274	0.27	1.09	1.63	34.01	33.77	34.59	54.2507	-0.0027	2	0.214795	0.340452	0.344586	0.899833	0.22506	0.332617	0.357296	0.304991		0	0	0	0	0	0	0	0	0	0	0	0.000877734	0	0	0	0	0	0	0	0.000298803	0	0	0.000149401	0.00147534	0.000392179	0	0	0	0	0
2	2275	-0.81	0.58	1.28	33.94	33.81	34.51	54.5837	-0.0095	1	0.21994	0.338875	0.321379	0.880194	0.227361	0.332273	0.337191	0.298942		0	0	0	0	0	0	0	0	0	0	0	0.000121433	0	0	0	0	0	0	0	0.00983607	0	0	0.000485732	0.000485732	0.000971463	0	0	0	0	0
2	2277	-0.2	0.37	1.81	34.06	33.81	34.56	55.2412	0.003	1	0.213673	0.318484	0.279612	0.811769	0.220817	0.327453	0.302775	0.283682		0	0	0	0	0	0	0	0	0	0	0	0.000207598	0	0	0	0	0	0	0	0.0205522	0	0	0.00249118	0.000103799	0.00155699	0	0	0	0	0
2	2278	-0.09	0.3	1.5	34.1	33.89	34.55	55.5677	0.0022	2	0.204518	0.315734	0.280917	0.801169	0.211703	0.32137	0.280533	0.271202		0	0	0	0	0	0	0	0	0	0	0	0.000386797	0	0	0	0	0	0	0	0.0113461	0	0	0.00103146	0.000386797	0.00128932	0	0	0	0	0
2	2279	-0.39	0.3	1.45	34.13	33.91	34.59	55.8997	0.0013	2	0.193583	0.313545	0.278399	0.785527	0.204613	0.315773	0.269889	0.263425		0	0	0	0	0	0	0	0	0	0	0	0	0	0	0	0	0	0.000150625	0	0.05784	0	0	0.00286188	0.00158156	0.00188281	0	0	0	0	0
2	2280	-0.53	0.29	0.5	34.26	34.04	34.57	56.2222	0.0023	1	0.188629	0.313314	0.267229	0.769172	0.199098	0.314115	0.270152	0.261122		0	0	0	0	0	0	0	0	0	0	0	0	0	0	0	0	0	0.000136147	0	0.0190606	0	0	0.0033356	0.00204221	0.000476515	0	0	0	0	0
2	2281	-0.28	0.2	0.83	34.34	34.14	34.65	56.5618	0.0023	0	0.193664	0.313352	0.262674	0.76969	0.197324	0.31524	0.271914	0.261493		0	0	0	0	0	0	0	0	0	0	0	0	0	0	0	0.000157233	0	0.000628931	0	0.0314465	0	0	0.00212264	0.000314465	0.000235849	0	0	0	0	0
2	2282	-0.348	0.02	0.59	34.306	34.18	34.64	56.8968	-0.0098	2	0.207454	0.338328	0.262639	0.808421	0.198146	0.306117	0.280217	0.261493		0	0	0	0	0	0	0	0	0	0	0	0	0	0	0	0	0	0.000237614	0	0.0248307	0	0	0.000237614	0.00380183	0	0	0	0	0	0
3	2206	16.61	18.81	15.2	35.54	35.62	35.43	34.4365	14.4093	2	0.339204	0.304788	0.19421	0.838202	0.682847	0.606046	0.416787	0.56856		0	0	0	0	0	0	0	0.00574713	0	0	0	0	0	0.00191571	0	0	0	0	0	0.00957854	0	0	0	0.00957854	0	0	0	0	0	0.00191571
3	2208	15.11	19.28	13.57	35.4	35.58	35.18	35.02	14.0642	1	0.329714	0.333195	0.206422	0.869331	0.502769	0.45787	0.286098	0.415579		0.00176211	0	0	0	0	0	0	0	0	0	0	0	0	0.000881057	0	0	0	0	0	0.0123348	0	0	0	0.00528634	0	0.00704846	0	0	0.000881057	0.00176211
3	2210	16.12	18.7	15.29	35.5	35.62	35.44	35.6248	13.6818	2	0.324902	0.393015	0.191996	0.909913	0.332584	0.396252	0.226889	0.318575		0.0330319	0	0	0	0.00570193	0	0	0	0	0	0	0	0.0123869	0.000786473	0	0	0	0	0.000393236	0.000393236	0.000196618	0.000196618	0	0.00393236	0	0	0.0086512	0	0.00353913	0.000589855
3	2212	16.39	18.65	14.81	35.53	35.62	35.4	36.239	13.308	0	0.336162	0.390487	0.177014	0.903663	0.330853	0.39566	0.218029	0.314847		0.00084317	0	0	0	0	0	0	0.00126476	0	0	0	0	0	0.000421585	0	0.000421585	0	0	0.000421585	0.00379427	0	0	0	0	0	0	0.000421585	0	0.00379427	0
3	2214	13.54	18.45	12.47	35.22	35.61	35.1	36.8322	12.9385	2	0.332075	0.342623	0.21406	0.888758	0.340843	0.378567	0.234217	0.317876		0	0	0	0	0	0	0	0	0	0.000525762	0	0	0	0	0	0.000525762	0	0	0	0.000525762	0	0	0	0.00525762	0	0	0.00105152	0	0	0
3	2216	11.69	17.39	11.42	34.95	35.6	35	37.4183	12.5513	1	0.313152	0.321509	0.303518	0.938179	0.350599	0.369087	0.283286	0.334324		0	0	0	0	0	0	0	0	0	0	0	0	0	0.002849	0	0	0	0	0	0	0	0	0	0.00854701	0	0	0.002849	0	0	0
3	2218	9.5	15.75	8.85	34.68	35.2	34.6	37.9893	12.1565	2	0.296603	0.339582	0.38951	1.0257	0.348743	0.362456	0.333565	0.348255		0	0	0	0	0	0.00283126	0	0	0	0	0	0	0	0	0	0	0	0	0	0.000566251	0	0	0	0.00226501	0	0	0.00226501	0	0.000566251	0
3	2220	10.13	16.33	9.25	34.8	35.44	34.7	38.5898	11.7487	2	0.293287	0.351644	0.428409	1.07334	0.324049	0.362139	0.362168	0.349452		0	0	0	0	0.000726744	0	0	0.000726744	0	0	0	0	0	0	0	0.000726744	0	0	0	0.00145349	0	0	0	0.00363372	0	0	0.00218023	0	0.000726744	0
3	2222	12.3	16.56	11.34	35.04	35.57	34.89	39.1843	11.3302	2	0.272812	0.372144	0.424315	1.06927	0.28628	0.368093	0.367388	0.340587		0	0	0	0	0.000462963	0	0	0	0.000462963	0	0	0	0	0	0	0.000462963	0	0	0	0.00509259	0	0.000462963	0	0.00185185	0	0	0	0	0.00138889	0
3	2224	16.09	17.09	14.99	35.54	35.6	35.41	39.6823	10.9302	2	0.251796	0.390853	0.403351	1.046	0.262219	0.38552	0.361754	0.336498		0	0	0.000289519	0	0.00434279	0	0	0	0	0	0	0.000289519	0	0	0	0	0	0	0	0.00347423	0.000289519	0	0	0.0121598	0	0	0.00231616	0	0.00115808	0
3	2226	14.46	16.87	13.15	35.33	35.6	35.19	40.3775	10.532	1	0.254595	0.406448	0.402265	1.06331	0.248569	0.413025	0.362392	0.341329		7.81616e-05	0	0	0	0.00187588	0	0	0	0	0	0	0.000156323	0	0	0	0	0	0	7.81616e-05	0.00117242	0	0.000156323	7.81616e-05	0.00171956	0	0	0.00406441	0	0.000859778	0
3	2228	10.78	16.17	9.86	34.88	35.46	34.79	40.9778	10.0573	2	0.265559	0.36091	0.361892	0.988361	0.255078	0.406584	0.342722	0.334795		0	0	0	0	0	0.00031736	0	0	0	0	0	0	0	0.00031736	0	0	0	0	0	0.00222152	0.00031736	0	0	0.00190416	0	0	0.000634719	0	0	0
3	2230	10.22	16.04	9.4	34.8	35.43	34.73	41.5328	9.6432	0	0.268344	0.365122	0.331829	0.965295	0.279805	0.382256	0.32558	0.329214		0	0	0	0	0	0	0.00141176	0	0	0	0.000235294	0	0	0	0	0	0	0	0.000235294	0.000470588	0	0	0	0.004	0	0	0.00376471	0	0.00164706	0
3	2232	7.49	11.67	7.22	34.4	34.47	34.41	42.11	9.1905	2	0.274894	0.378159	0.334374	0.987427	0.298919	0.361494	0.307003	0.322472		0	0	0	0	0	0.00106895	0	0	0	0	0	0	0	0	0	0	0	0	0	0.00587921	0	0	0	0.00641368	0	0	0.00160342	0	0	0
3	2234	7.29	11.48	6.79	34.4	34.39	34.37	42.6912	8.7402	0	0.318139	0.346154	0.291943	0.956236	0.301607	0.343966	0.288362	0.311312		0	0	0	0	0	0.000934579	0	0	0	0	0	0	0	0	0	0.000934579	0	0	0	0.0196262	0	0	0	0	0	0	0.00280374	0	0	0
3	2236	7.92	11	7.61	34.42	34.4	34.43	43.2668	8.2662	2	0.300863	0.305001	0.252769	0.858633	0.300648	0.316247	0.271787	0.296227		0	0	0	0	0	0.00254669	0	0	0	0	0	0	0	0	0	0	0	0	0	0.00452745	0	0	0	0.0178268	0	0	0	0	0	0
3	2238	7.78	10.72	7.18	34.47	34.51	34.42	43.8445	7.7982	0	0.313987	0.284463	0.244399	0.842849	0.291072	0.27958	0.283203	0.284618		0	0	0	0	0	0.00126582	0	0	0	0	0	0.00126582	0	0	0	0	0	0	0	0.00379747	0	0	0	0.00126582	0	0	0	0	0	0
3	2240	6.01	9.51	5.18	34.27	34.27	34.22	44.4175	7.326	2	0.310208	0.262123	0.35158	0.923911	0.281902	0.254952	0.302912	0.279922		0	0	0	0	0	0	0	0	0	0	0	0	0	0	0	0.00269542	0	0	0	0.0161725	0	0	0	0	0.00269542	0	0	0	0	0
3	2242	4.52	7.63	4	34.1	33.84	34.14	44.9787	6.8065	0	0.274947	0.258623	0.426348	0.959918	0.26232	0.24935	0.326332	0.279334		0	0	0	0	0	0	0.00158264	0	0	0	0	0.000904364	0	0	0	0.000452182	0	0	0	0.0235135	0.000452182	0	0.000226091	0	0.000452182	0	0	0	0	0
3	2244	3.94	7.16	3.66	34.08	33.8	34.12	45.6285	6.1333	2	0.215755	0.243366	0.378855	0.837976	0.228123	0.233776	0.342435	0.268111		0	0	0	0	0	0	0	0	0	0	0	0.000919329	0	0	0	0	0	0	0	0.00758446	0	0	0.000459664	0	0.00137899	0	0	0	0	0
3	2246	3.82	7.4	3.44	34.05	33.77	34.11	46.0973	5.7627	0	0.200167	0.206945	0.350063	0.757175	0.206353	0.221844	0.328748	0.252315		0	0	0	0	0	0.000534378	0	0	0	0	0	0.000534378	0	0	0	0	0	0	0	0.0149626	0	0	0.000356252	0	0.000356252	0	0	0	0	0
3	2247	3.85	7	3.66	34.08	33.77	34.12	46.3857	5.5047	1	0.193931	0.191607	0.346347	0.731885	0.198516	0.212112	0.320173	0.2436		0	0	0	0	0	0	0	0	0	0	0	0.00423729	0	0	0	0	0	0	0	0.0066586	0.000605327	0	0.00121065	0	0.00121065	0	0	0	0	0
3	2249	4.05	7.2	3.77	34.1	33.83	34.12	46.9277	4.97	2	0.185835	0.179176	0.311946	0.676957	0.19388	0.203421	0.306689	0.234663		0	0	0	0	0	0	0	0	0	0	0	0.00568182	0	0	0	0	0	0	0	0.00568182	0	0	0	0	0	0	0	0	0	0
3	2251	4.07	7.09	3.68	34.1	33.8	34.12	47.4983	4.422	1	0.190792	0.192447	0.292075	0.675314	0.199685	0.206484	0.279501	0.228557		0	0	0	0	0	0	0	0	0	0	0	0.00376648	0	0	0	0	0	0	0	0.00188324	0	0	0	0	0	0	0	0	0	0
3	2253	7.1	6.9	3.65	33.8	33.78	34.11	48.0575	3.996	2	0.205953	0.207589	0.258295	0.671837	0.221505	0.231312	0.278003	0.243607		0	0	0	0	0	0	0	0	0	0	0	0	0	0	0	0	0	0	0	0	0	0	0	0	0	0	0	0	0	0
3	2255	3.28	6.07	3.02	34.09	33.78	34.12	48.5278	3.3028	2	0.243289	0.25495	0.261278	0.759517	0.246792	0.259978	0.295162	0.267311		0	0	0	0	0	0	0	0	0	0	0	0	0	0	0	0	0	0	0	0	0	0	0	0	0	0	0	0	0	0
3	2257	2.52	5.12	2.42	34.11	33.79	34.16	49.1713	2.6988	0	0.301861	0.312211	0.329356	0.943428	0.287874	0.320756	0.357259	0.321963		0	0	0	0	0	0	0	0	0	0	0	0	0	0	0	0	0	0	0	0	0	0	0	0	0	0	0	0	0	0
3	2259	2.31	5.03	2.35	34.09	33.79	34.17	49.6893	2.0833	2	0.327668	0.33779	0.380892	1.04635	0.309779	0.358142	0.417213	0.361711		0	0	0	0	0	0	0	0	0	0	0	0	0	0.00179051	0	0	0	0	0	0	0.00179051	0	0.00537153	0	0.00537153	0	0	0	0	0
3	2261	2.83	5	2.6	34.08	33.78	34.13	50.2323	1.4103	0	0.336132	0.418804	0.437051	1.19199	0.322461	0.379327	0.464823	0.38887		0	0	0	0	0	0	0	0	0	0	0	0.00194679	0	0	0	0	0	0	0	0.00194679	0.000648929	0	0.0045425	0	0.00259572	0	0	0	0	0
3	2263	2.13	4.25	2.21	34.19	33.81	34.25	50.7673	0.8265	2	0.342936	0.422813	0.439515	1.20526	0.318344	0.370615	0.459215	0.382725		0	0	0	0	0	0	0	0.000634719	0	0	0	0	0	0	0	0	0	0	0	0.00602983	0	0	0.000634719	0.000634719	0.0015868	0	0	0	0	0
3	2266	1.62	2.87	1.88	34.31	33.71	34.44	51.6121	0.0022	2	0.328496	0.333954	0.341835	1.00428	0.274965	0.312815	0.412138	0.333306		0	0	0	0	0	0	0	0.000352485	0	0	0	0	0	0	0	0	0	0	0	0	0	0	0.0105746	0	0	0	0	0	0	0
3	2268	1.34	2.9	1.94	34.4	33.74	34.47	52.2738	-0.0035	2	0.241795	0.25828	0.339747	0.839822	0.242411	0.288121	0.410098	0.313543		0	0	0	0	0	0	0	0.000185874	0	0	0	0	0	0	0	0.000929368	0	0	0	0.000557621	0	0	0.00501859	0	0	0	0	0	0	0
3	2270	1.34	0.92	1.6	34.49	33.77	34.58	52.9303	0.1833	0	0.205089	0.292813	0.391623	0.889525	0.211941	0.28628	0.405341	0.301187		0	0	0	0	0	0	0	0	0	0	0	0.0010352	0	0	0	0	0	0	0	0.0010352	0	0	0.00517598	0	0.0010352	0	0	0	0	0
3	2272	1.34	1.29	1.61	34.49	33.75	34.58	53.5931	0.2667	2	0.199489	0.332301	0.380068	0.911858	0.215163	0.316798	0.397581	0.309847		0	0	0	0	0	0	0	0	0	0	0	0.00110926	0	0	0	0	0	0	0	0	0	0	0.00277316	0.00277316	0.00166389	0	0	0	0	0
3	2273	1.52	1.19	1.63	34.55	33.77	34.59	53.8925	0.0015	2	0.206167	0.334536	0.362735	0.903438	0.218494	0.32753	0.388488	0.311504		0	0	0	0	0	0	0	0	0	0	0	0	0	0	0	0	0	0	0	0	0	0	0.000742115	0.00222635	0.000371058	0	0	0	0	0
3	2274	1.39	1.09	1.63	34.51	33.77	34.59	54.2507	-0.0027	2	0.214795	0.340452	0.344586	0.899833	0.22506	0.332617	0.357296	0.304991		0	0	0	0	0	0	0	0	0	0	0	0.00306937	0	0	0	0	0	0	0	0.000613874	0	0	0.00122775	0.00736648	0	0	0	0	0	0
3	2275	0.79	0.58	1.28	34.39	33.81	34.51	54.5837	-0.0095	1	0.21994	0.338875	0.321379	0.880194	0.227361	0.332273	0.337191	0.298942		0	0	0	0	0	0.000171262	0	0	0	0	0	0.000513787	0	0	0	0.000171262	0	0	0	0.00102757	0	0	0.00239767	0	0.00222641	0	0	0	0	0
3	2277	1.64	0.37	1.81	34.49	33.81	34.56	55.2412	0.003	1	0.213673	0.318484	0.279612	0.811769	0.220817	0.327453	0.302775	0.283682		0	0	0	0	0	0	0	0	0	0	0	0.000260417	0	0	0	0.000260417	0	0	0	0.00078125	0	0	0.00859375	0	0.00182292	0	0	0	0	0
3	2278	1.48	0.3	1.5	34.48	33.89	34.55	55.5677	0.0022	2	0.204518	0.315734	0.280917	0.801169	0.211703	0.32137	0.280533	0.271202		0	0	0	0	0	0.000245218	0	0	0	0	0	0.000490436	0	0	0	0.000245218	0	0	0	0	0	0	0.00441393	0	0.000490436	0	0	0	0	0
3	2279	1.07	0.3	1.45	34.5	33.91	34.59	55.8997	0.0013	2	0.193583	0.313545	0.278399	0.785527	0.204613	0.315773	0.269889	0.263425		0	0	0	0	0	0.000123716	0	0	0	0	0	0	0	0	0	0.000247433	0	0.000742299	0	0.00296919	0	0	0.00618582	0	0.00160831	0	0	0	0	0
3	2280	0.09	0.29	0.5	34.5	34.04	34.57	56.2222	0.0023	1	0.188629	0.313314	0.267229	0.769172	0.199098	0.314115	0.270152	0.261122		0	0	0	0	0	0	0	0	0	0	0	0	0	0	0	0.000215193	0	0.000215193	0	0.00344308	0	0	0.0157091	0.000215193	0.000645578	0	0	0	0	0
3	2281	0.78	0.2	0.83	34.61	34.14	34.65	56.5618	0.0023	0	0.193664	0.313352	0.262674	0.76969	0.197324	0.31524	0.271914	0.261493		0	0	0	0	0	0	0	0	0	0	0	0	0	0	0	0	0	0.0016442	0	0.0075633	0	0	0.00591911	0	0	0	0	0	0	0
3	2282	0.47	0.02	0.59	34.6	34.18	34.64	56.8968	-0.0098	2	0.207454	0.338328	0.262639	0.808421	0.198146	0.306117	0.280217	0.261493		0	0	0	0	0	0	0	0.000771605	0	0	0	0	0	0	0	0	0	0.00154321	0	0.123457	0	0	0.0223765	0.00231481	0	0	0	0	0	0
[truncated: 139 more columns]

## Sheet: Diversity indices
	1	2	3	4	5	6	7	8	9	10	11	12	13	14	15	16	17	18	19	20	21	22	23	24	25	26	27	28	29	30	31	32	33	34	35	36	37	38	39	40	41	42	43	44	45	46	47	48	49
Taxa_S	34	42	16	33	9	15	22	22	26	14	31	22	27	22	32	12	24	26	24	14	20	20	19	18	19	10	16	16	23	22	22	18	24	17	18	18	25	20	18	14	13	17	10	33	48	43	48	23	32
Individuals	0	0	0	0	0	0	0	0	0	0	0	0	0	0	0	0	0	0	0	0	0	0	0	0	0	0	0	0	0	0	0	0	0	0	0	0	0	0	0	0	0	0	0	0	0	0	0	0	0
Dominance_D	0.09381	0.1753	0.09769	0.1272	0.3064	0.368	0.3602	0.4892	0.2039	0.2242	0.149	0.3677	0.2503	0.7713	0.3145	0.8825	0.1634	0.2161	0.2102	0.3797	0.2268	0.2321	0.332	0.2236	0.7755	0.6084	0.3359	0.4571	0.523	0.4884	0.3088	0.526	0.3268	0.3592	0.2869	0.477	0.4122	0.6108	0.532	0.7672	0.7574	0.5835	0.3628	0.1797	0.1275	0.09584	0.1033	0.6457	0.2424
Simpson_1-D	0.9062	0.8247	0.9023	0.8728	0.6936	0.632	0.6398	0.5108	0.7961	0.7758	0.851	0.6323	0.7497	0.2287	0.6855	0.1175	0.8366	0.7839	0.7898	0.6203	0.7732	0.7679	0.668	0.7764	0.2245	0.3916	0.6641	0.5429	0.477	0.5116	0.6912	0.474	0.6732	0.6408	0.7131	0.523	0.5878	0.3892	0.468	0.2328	0.2426	0.4165	0.6372	0.8203	0.8725	0.9042	0.8967	0.3543	0.7576
Shannon_H	2.766	2.179	2.525	2.43	1.558	1.552	1.617	1.309	1.956	1.764	2.183	1.461	1.901	0.5904	1.609	0.3108	2.19	1.728	1.817	1.167	1.859	1.764	1.58	1.711	0.575	0.9357	1.379	1.112	1.081	1.137	1.763	1.08	1.424	1.401	1.497	1.196	1.278	0.9117	1.058	0.6069	0.6211	0.9716	1.297	2.16	2.566	2.636	2.644	0.9786	2.134
Evenness_e^H/S	0.4677	0.2105	0.7805	0.3443	0.5278	0.3146	0.229	0.1682	0.2721	0.4169	0.2862	0.1958	0.2479	0.08203	0.1562	0.1137	0.3724	0.2166	0.2564	0.2294	0.321	0.2918	0.2556	0.3075	0.09353	0.2549	0.2481	0.1901	0.1281	0.1417	0.2649	0.1637	0.173	0.2389	0.2482	0.1838	0.1436	0.1244	0.1601	0.1311	0.1432	0.1554	0.3657	0.2626	0.271	0.3246	0.2932	0.1157	0.2639
Brillouin	0.5084	0.4564	0.5085	0.4981	0.3732	0.378	0.4462	0.2704	0.4384	0.4446	0.4671	0.345	0.4159	0.1211	0.3862	0.059	0.4609	0.4185	0.4228	0.3154	0.416	0.4096	0.3585	0.4138	0.1139	0.2099	0.3573	0.2808	0.2465	0.2727	0.4345	0.2519	0.3557	0.3362	0.3751	0.2716	0.3064	0.2004	0.2478	0.1189	0.1267	0.2145	0.3374	0.4479	0.4932	0.5043	0.5057	0.187	0.459
Menhinick	34.95	43.65	16.85	36.68	9.186	16.93	31.23	22.18	27.08	15.71	31.28	22.77	28.29	22.17	34.33	12	24.54	26.04	24.05	14	20.04	20.01	19.35	18.02	19.01	10.16	16.53	16.12	23.1	22.41	27.47	18.25	24.2	17.06	18.09	18.03	25.06	20.04	18.25	14.02	13.07	17.04	10.25	33.37	51.59	43.49	50.75	23.19	39.16
Margalef	0	0	0	0	0	0	0	0	0	0	0	0	0	0	0	0	0	0	0	0	0	0	0	0	0	0	0	0	0	0	0	0	0	0	0	0	0	0	0	0	0	0	0	0	0	0	0	0	0
Equitability_J	0.7845	0.5831	0.9106	0.6951	0.7091	0.573	0.5232	0.4234	0.6005	0.6685	0.6357	0.4725	0.5768	0.191	0.4643	0.1251	0.6892	0.5305	0.5718	0.4421	0.6207	0.5889	0.5367	0.592	0.1953	0.4064	0.4972	0.4012	0.3446	0.3679	0.5703	0.3738	0.448	0.4946	0.5179	0.4139	0.397	0.3043	0.3662	0.23	0.2422	0.3429	0.5631	0.6176	0.6628	0.7009	0.6831	0.3121	0.6156
Fisher_alpha	0	0	0	0	0	0	0	0	0	0	0	0	0	0	0	0	0	0	0	0	0	0	0	0	0	0	0	0	0	0	0	0	0	0	0	0	0	0	0	0	0	0	0	0	0	0	0	0	0
Berger-Parker	0	0	0	0	0	0	0	0	0	0	0	0	0	0	0	0	0	0	0	0	0	0	0	0	0	0	0	0	0	0	0	0	0	0	0	0	0	0	0	0	0	0	0	0	0	0	0	0	0
Chao-1	34	42	16	33	9	15	22	22	26	14	31	22	27	22	32	12	24	26	24	14	20	20	19	18	19	10	16	16	23	22	22	18	24	17	18	18	25	20	18	14	13	17	10	33	48	43	48	23	32
Latitude	Layer	Taxa_S	Individuals	Dominance_D	Simpson_1-D	Shannon_H	Evenness_e^H/S	Brillouin	Menhinick	Margalef	Equitability_J	Fisher_alpha	Berger-Parker	Chao-1
34.4365	-1	34	0	0.09381	0.9062	2.766	0.4677	0.5084	34.95	0	0.7845	0	0	34
35.02	-1	42	0	0.1753	0.8247	2.179	0.2105	0.4564	43.65	0	0.5831	0	0	42
35.6248	-1	16	0	0.09769	0.9023	2.525	0.7805	0.5085	16.85	0	0.9106	0	0	16
36.239	-1	33	0	0.1272	0.8728	2.43	0.3443	0.4981	36.68	0	0.6951	0	0	33
36.8322	-1	9	0	0.3064	0.6936	1.558	0.5278	0.3732	9.186	0	0.7091	0	0	9
37.4183	-1	15	0	0.368	0.632	1.552	0.3146	0.378	16.93	0	0.573	0	0	15
37.9893	-1	22	0	0.3602	0.6398	1.617	0.229	0.4462	31.23	0	0.5232	0	0	22
38.5898	-1	22	0	0.4892	0.5108	1.309	0.1682	0.2704	22.18	0	0.4234	0	0	22
39.1843	-1	26	0	0.2039	0.7961	1.956	0.2721	0.4384	27.08	0	0.6005	0	0	26
39.6823	-1	14	0	0.2242	0.7758	1.764	0.4169	0.4446	15.71	0	0.6685	0	0	14
40.3775	-1	31	0	0.149	0.851	2.183	0.2862	0.4671	31.28	0	0.6357	0	0	31
40.9778	-1	22	0	0.3677	0.6323	1.461	0.1958	0.345	22.77	0	0.4725	0	0	22
41.5328	-1	27	0	0.2503	0.7497	1.901	0.2479	0.4159	28.29	0	0.5768	0	0	27
42.11	-1	22	0	0.7713	0.2287	0.5904	0.08203	0.1211	22.17	0	0.191	0	0	22
42.6912	-1	32	0	0.3145	0.6855	1.609	0.1562	0.3862	34.33	0	0.4643	0	0	32
43.2668	-1	12	0	0.8825	0.1175	0.3108	0.1137	0.059	12	0	0.1251	0	0	12
43.8445	-1	24	0	0.1634	0.8366	2.19	0.3724	0.4609	24.54	0	0.6892	0	0	24
44.4175	-1	26	0	0.2161	0.7839	1.728	0.2166	0.4185	26.04	0	0.5305	0	0	26
44.9787	-1	24	0	0.2102	0.7898	1.817	0.2564	0.4228	24.05	0	0.5718	0	0	24
45.6285	-1	14	0	0.3797	0.6203	1.167	0.2294	0.3154	14	0	0.4421	0	0	14
46.0973	-1	20	0	0.2268	0.7732	1.859	0.321	0.416	20.04	0	0.6207	0	0	20
46.3857	-1	20	0	0.2321	0.7679	1.764	0.2918	0.4096	20.01	0	0.5889	0	0	20
46.9277	-1	19	0	0.332	0.668	1.58	0.2556	0.3585	19.35	0	0.5367	0	0	19
47.4983	-1	18	0	0.2236	0.7764	1.711	0.3075	0.4138	18.02	0	0.592	0	0	18
48.0575	-1	19	0	0.7755	0.2245	0.575	0.09353	0.1139	19.01	0	0.1953	0	0	19
48.5278	-1	10	0	0.6084	0.3916	0.9357	0.2549	0.2099	10.16	0	0.4064	0	0	10
49.1713	-1	16	0	0.3359	0.6641	1.379	0.2481	0.3573	16.53	0	0.4972	0	0	16
49.6893	-1	16	0	0.4571	0.5429	1.112	0.1901	0.2808	16.12	0	0.4012	0	0	16
50.2323	-1	23	0	0.523	0.477	1.081	0.1281	0.2465	23.1	0	0.3446	0	0	23
50.7673	-1	22	0	0.4884	0.5116	1.137	0.1417	0.2727	22.41	0	0.3679	0	0	22
51.6121	-1	22	0	0.3088	0.6912	1.763	0.2649	0.4345	27.47	0	0.5703	0	0	22
52.2738	-1	18	0	0.526	0.474	1.08	0.1637	0.2519	18.25	0	0.3738	0	0	18
52.9303	-1	24	0	0.3268	0.6732	1.424	0.173	0.3557	24.2	0	0.448	0	0	24
53.5931	-1	17	0	0.3592	0.6408	1.401	0.2389	0.3362	17.06	0	0.4946	0	0	17
53.8925	-1	18	0	0.2869	0.7131	1.497	0.2482	0.3751	18.09	0	0.5179	0	0	18
54.2507	-1	18	0	0.477	0.523	1.196	0.1838	0.2716	18.03	0	0.4139	0	0	18
54.5837	-1	25	0	0.4122	0.5878	1.278	0.1436	0.3064	25.06	0	0.397	0	0	25
55.2412	-1	20	0	0.6108	0.3892	0.9117	0.1244	0.2004	20.04	0	0.3043	0	0	20
55.5677	-1	18	0	0.532	0.468	1.058	0.1601	0.2478	18.25	0	0.3662	0	0	18
55.8997	-1	14	0	0.7672	0.2328	0.6069	0.1311	0.1189	14.02	0	0.23	0	0	14
56.2222	-1	13	0	0.7574	0.2426	0.6211	0.1432	0.1267	13.07	0	0.2422	0	0	13
56.5618	-1	17	0	0.5835	0.4165	0.9716	0.1554	0.2145	17.04	0	0.3429	0	0	17
56.8968	-1	10	0	0.3628	0.6372	1.297	0.3657	0.3374	10.25	0	0.5631	0	0	10
34.4365	-2	33	0	0.1797	0.8203	2.16	0.2626	0.4479	33.37	0	0.6176	0	0	33
35.02	-2	48	0	0.1275	0.8725	2.566	0.271	0.4932	51.59	0	0.6628	0	0	48
35.6248	-2	43	0	0.09584	0.9042	2.636	0.3246	0.5043	43.49	0	0.7009	0	0	43
36.239	-2	48	0	0.1033	0.8967	2.644	0.2932	0.5057	50.75	0	0.6831	0	0	48
36.8322	-2	23	0	0.6457	0.3543	0.9786	0.1157	0.187	23.19	0	0.3121	0	0	23
37.4183	-2	32	0	0.2424	0.7576	2.134	0.2639	0.459	39.16	0	0.6156	0	0	32
37.9893	-2	28	0	0.5167	0.4833	1.305	0.1317	0.254	28.13	0	0.3916	0	0	28
38.5898	-2	37	0	0.3979	0.6021	1.486	0.1195	0.322	37.7	0	0.4116	0	0	37
39.1843	-2	39	0	0.1508	0.8492	2.286	0.2523	0.4658	39.32	0	0.6241	0	0	39
39.6823	-2	34	0	0.1833	0.8167	2.216	0.2697	0.4472	34.29	0	0.6284	0	0	34
40.3775	-2	39	0	0.2374	0.7626	2.036	0.1963	0.4223	40.58	0	0.5556	0	0	39
40.9778	-2	29	0	0.3327	0.6673	1.463	0.149	0.3507	29.12	0	0.4346	0	0	29
41.5328	-2	28	0	0.2135	0.7865	1.985	0.2601	0.4334	29.09	0	0.5958	0	0	28
42.11	-2	29	0	0.1848	0.8152	2.02	0.2599	0.4413	29.09	0	0.5998	0	0	29
42.6912	-2	33	0	0.2287	0.7713	1.983	0.2202	0.4308	34.97	0	0.5673	0	0	33
43.2668	-2	23	0	0.1964	0.8036	1.888	0.2872	0.4326	23.02	0	0.6021	0	0	23
43.8445	-2	27	0	0.245	0.755	2.085	0.2979	0.4171	27.89	0	0.6326	0	0	27
44.4175	-2	28	0	0.2201	0.7799	1.87	0.2317	0.4322	29.54	0	0.5612	0	0	28
44.9787	-2	25	0	0.289	0.711	1.771	0.2351	0.3894	25.85	0	0.5502	0	0	25
45.6285	-2	32	0	0.1642	0.8358	2.178	0.2759	0.4607	32.87	0	0.6284	0	0	32
46.0973	-2	32	0	0.2123	0.7877	2.047	0.242	0.4352	33.23	0	0.5906	0	0	32
46.3857	-2	28	0	0.1482	0.8518	2.264	0.3435	0.4741	29.22	0	0.6793	0	0	28
46.9277	-2	21	0	0.1618	0.8382	2.128	0.4	0.4665	22.07	0	0.6991	0	0	21
47.4983	-2	16	0	0.1898	0.8102	1.86	0.4014	0.4509	17.03	0	0.6708	0	0	16
48.0575	-2	13	0	0.2188	0.7812	1.928	0.5289	0.4427	14.15	0	0.7516	0	0	13
48.5278	-2	14	0	0.2924	0.7076	1.753	0.4122	0.3941	14.75	0	0.6642	0	0	14
49.1713	-2	3	0	0.44	0.56	0.9503	0.8621	0.4722	5.367	0	0.865	0	0	3
49.6893	-2	21	0	0.254	0.746	1.869	0.3087	0.4117	21.9	0	0.614	0	0	21
50.2323	-2	27	0	0.3538	0.6462	1.569	0.1778	0.3687	29.09	0	0.4759	0	0	27
50.7673	-2	26	0	0.4166	0.5834	1.435	0.1616	0.3292	27.55	0	0.4406	0	0	26
51.6121	-2	26	0	0.4499	0.5501	1.369	0.1511	0.3298	28.7	0	0.42	0	0	26
52.2738	-2	27	0	0.3474	0.6526	1.563	0.1767	0.3721	29.16	0	0.4742	0	0	27
52.9303	-2	25	0	0.2166	0.7834	1.807	0.2437	0.4442	27.6	0	0.5614	0	0	25
53.5931	-2	26	0	0.2783	0.7217	1.623	0.1949	0.3937	26.96	0	0.498	0	0	26
53.8925	-2	28	0	0.329	0.671	1.466	0.1547	0.3669	29.16	0	0.4399	0	0	28
54.2507	-2	26	0	0.3913	0.6087	1.309	0.1423	0.3206	26.3	0	0.4016	0	0	26
54.5837	-2	24	0	0.3502	0.6498	1.57	0.2002	0.3692	25.76	0	0.494	0	0	24
55.2412	-2	28	0	0.3613	0.6387	1.605	0.1778	0.3657	30.24	0	0.4817	0	0	28
55.5677	-2	24	0	0.2823	0.7177	1.645	0.2159	0.3978	25.4	0	0.5176	0	0	24
55.8997	-2	25	0	0.3613	0.6387	1.525	0.1838	0.3599	26.6	0	0.4738	0	0	25
56.2222	-2	26	0	0.5621	0.4379	1.095	0.1149	0.2368	26.52	0	0.336	0	0	26
56.5618	-2	24	0	0.5157	0.4843	1.202	0.1386	0.2665	24.74	0	0.3783	0	0	24
56.8968	-2	17	0	0.6295	0.3705	0.9268	0.1486	0.193	17.08	0	0.3271	0	0	17
34.4365	-3	34	0	0.09381	0.9062	2.766	0.4677	0.5084	34.95	0	0.7845	0	0	34
35.02	-3	38	0	0.2278	0.7722	2.163	0.2289	0.4289	39.68	0	0.5947	0	0	38
35.6248	-3	48	0	0.1275	0.8725	2.566	0.271	0.4932	51.59	0	0.6628	0	0	48
36.239	-3	37	0	0.358	0.642	1.656	0.1416	0.345	37.71	0	0.4587	0	0	37
36.8322	-3	32	0	0.1509	0.8491	2.287	0.3078	0.4736	33.63	0	0.66	0	0	32
37.4183	-3	24	0	0.1011	0.8989	2.56	0.5393	0.5195	28.16	0	0.8057	0	0	24
37.9893	-3	32	0	0.1506	0.8494	2.246	0.2952	0.4895	36.78	0	0.6479	0	0	32
38.5898	-3	34	0	0.2138	0.7862	2.086	0.2369	0.4516	38.1	0	0.5916	0	0	34
39.1843	-3	38	0	0.1009	0.8991	2.561	0.3407	0.5207	45.09	0	0.704	0	0	38
39.6823	-3	39	0	0.1152	0.8848	2.59	0.3418	0.4994	41.56	0	0.707	0	0	39
40.3775	-3	45	0	0.1439	0.8561	2.357	0.2347	0.4818	48.16	0	0.6192	0	0	45
40.9778	-3	29	0	0.149	0.851	2.204	0.3125	0.4861	32.49	0	0.6546	0	0	29
41.5328	-3	33	0	0.3164	0.6836	1.739	0.1726	0.3983	36.77	0	0.4975	0	0	33
42.11	-3	24	0	0.2097	0.7903	2.098	0.3396	0.4443	25.6	0	0.6602	0	0	24
42.6912	-3	22	0	0.1402	0.8598	2.264	0.4371	0.4821	23.37	0	0.7323	0	0	22
43.2668	-3	20	0	0.2325	0.7675	1.83	0.3116	0.4126	20.19	0	0.6108	0	0	20
43.8445	-3	22	0	0.1902	0.8098	2.075	0.3621	0.4555	23.7	0	0.6713	0	0	22
44.4175	-3	22	0	0.1686	0.8314	2.171	0.3987	0.4786	25.03	0	0.7025	0	0	22
44.9787	-3	32	0	0.2319	0.7681	1.986	0.2277	0.4493	36.8	0	0.573	0	0	32
45.6285	-3	25	0	0.129	0.871	2.332	0.4118	0.5006	28.53	0	0.7243	0	0	25
46.0973	-3	31	0	0.1614	0.8386	2.196	0.2901	0.4756	33.87	0	0.6396	0	0	31
46.3857	-3	24	0	0.1049	0.8951	2.502	0.5085	0.5152	27.67	0	0.7872	0	0	24
46.9277	-3	19	0	0.1312	0.8688	2.397	0.5785	0.5105	23.45	0	0.8141	0	0	19
47.4983	-3	19	0	0.2682	0.7318	1.87	0.3415	0.4771	26.95	0	0.6351	0	0	19
48.0575	-3	10	0	0.2009	0.7991	1.924	0.685	0.4848	12.84	0	0.8357	0	0	10
48.5278	-3
49.1713	-3	1	0	1	0	0	1	0.1535	1.225	0		0	0	1
49.6893	-3	22	0	0.1764	0.8236	2.08	0.3638	0.4748	25.2	0	0.6729	0	0	22
50.2323	-3	25	0	0.1291	0.8709	2.288	0.3941	0.5146	31.82	0	0.7107	0	0	25
50.7673	-3	23	0	0.2176	0.7824	1.951	0.3059	0.467	28.02	0	0.6223	0	0	23
51.6121	-3	22	0	0.3088	0.6912	1.763	0.2649	0.4345	27.47	0	0.5703	0	0	22
52.2738	-3	26	0	0.223	0.777	1.974	0.277	0.4591	30.7	0	0.606	0	0	26
52.9303	-3	21	0	0.213	0.787	1.888	0.3145	0.4706	25.86	0	0.6201	0	0	21
53.5931	-3	23	0	0.2695	0.7305	1.775	0.2567	0.4459	28.39	0	0.5662	0	0	23
53.8925	-3	26	0	0.2165	0.7835	1.8	0.2326	0.4574	30.38	0	0.5524	0	0	26
54.2507	-3	22	0	0.1325	0.8675	2.264	0.4373	0.5211	30.05	0	0.7324	0	0	22
54.5837	-3	26	0	0.2894	0.7106	1.711	0.2128	0.4114	28.99	0	0.5251	0	0	26
55.2412	-3	27	0	0.25	0.75	1.945	0.2591	0.4426	31.34	0	0.5902	0	0	27
55.5677	-3	25	0	0.2753	0.7247	1.766	0.234	0.4321	29.37	0	0.5487	0	0	25
55.8997	-3	26	0	0.3428	0.6572	1.464	0.1663	0.396	30.4	0	0.4494	0	0	26
56.2222	-3	25	0	0.3293	0.6707	1.574	0.1931	0.3844	27.45	0	0.4891	0	0	25
56.5618	-3	22	0	0.3195	0.6805	1.551	0.2144	0.3969	24.86	0	0.5018	0	0	22
56.8968	-3	24	0	0.3201	0.6799	1.73	0.2351	0.3918	26.3	0	0.5445	0	0	24
[truncated: 80 more columns]

## Sheet: Contributions
	99.9994		Total	100
Oithona similis Claus, 1866	49.034		Oithona similis Claus, 1866	49.1999
Copepoda copepodites	12.5501		Copepoda copepodites	11.8641
Foraminifera	4.91206		Euphausiacea nauplii	4.91343
Ctenocalanus citer Heron & Bowman, 1971	4.86085		Ctenocalanus citer Heron & Bowman, 1971	4.89414
Euphausiacea nauplii	4.81658		Foraminifera	4.62067	75.4922
Microcalanus pusillus Sars G.O., 1903	2.88352		Ova (?)	3.05726
Ova (?)	2.78807		Microcalanus pusillus Sars G.O., 1903	2.82129
Appendicularia	2.32837		Appendicularia	2.69878
Radiolaria	1.84062		Radiolaria	2.03544
Triconia antarctica (Heron, 1977)	2.03392		Clausocalanus brevipes Frost & Fleminger, 1968	1.36338
Clausocalanus brevipes Frost & Fleminger, 1968	1.01174	89.0598	Triconia antarctica ♂ (Heron, 1977)	1.295
Clausocalanus pergens Farran, 1926	0.821627		Clausocalanus pergens Farran, 1926	1.09923
Ostracoda	0.797759		Paracalanus parvus parvus (Claus, 1863)	0.809427	89.8626
Oncaea sp.	0.731004		Oncaea sp.	0.668287
Pleuromamma gracilis Claus, 1863	0.662965		Pleuromamma gracilis Claus, 1863	0.646516
Paracalanus parvus parvus (Claus, 1863)	0.651199		Ostracoda	0.559683
Metridia lucens lucens Boeck, 1865	0.589242		Metridia lucens lucens Boeck, 1865	0.488765
Chaetognatha	0.563766		Chaetognatha	0.453872
Oithona plumifera Baird, 1843	0.457379		Acartia longiremis (Lilljeborg, 1853)	0.433921
Scolecithricella minor (Brady, 1883)	0.441039		Copepoda nauplii	0.431231
Copepoda nauplii	0.42897		Calanus simillimus Giesbrecht, 1902	0.417912
Calanus simillimus Giesbrecht, 1902	0.397802		Calocalanus contractus Farran, 1926	0.394573
Ctenocalanus vanus Giesbrecht, 1888	0.348822		Pteropoda	0.392656
Euchaeta marina (Prestandrea, 1833)	0.333698		Scolecithricella minor (Brady, 1883)	0.349016
Calocalanus contractus Farran, 1926	0.314664		Oithona plumifera Baird, 1843	0.341936
Pteropoda	0.294333		Ctenocalanus vanus Giesbrecht, 1888	0.30982
Calanus propinquus Brady, 1883	0.269743		Calocalanus styliremis Giesbrecht, 1888	0.295164
Acartia longiremis (Lilljeborg, 1853)	0.256016		Calanus propinquus Brady, 1883	0.287702
Calocalanus styliremis Giesbrecht, 1888	0.253779		Euchaeta marina (Prestandrea, 1833)	0.245461
Clausocalanus sp.	0.244444		Triconia antarctica ♀ (Heron, 1977)	0.230515
Corycaeus giesbrechti	0.224935		Corycaeus giesbrechti	0.194677
Euphausiacea calyptopis	0.182903		Euphausiacea calyptopis	0.192395
Clausocalanus laticeps Farran, 1929	0.154278		Salpa	0.180516
Rhincalanus gigas Brady, 1883	0.1263		Clausocalanus laticeps Farran, 1929	0.145761
Euphausiacea furcilia	0.114308		Euphausiacea furcilia	0.138751
Siphonophora	0.109163		Rhincalanus gigas Brady, 1883	0.107552
Nannocalanus minor (Claus, 1863)	0.0918705		Nannocalanus minor (Claus, 1863)	0.0883237
Polychaeta	0.0858953		Siphonophora	0.0850962
Heterorhabdus spinifrons (Claus, 1863)	0.0793746		Polychaeta	0.0775277
Salpa	0.0793687		Calanoides acutus (Giesbrecht, 1902)	0.0756033
Calanoides acutus (Giesbrecht, 1902)	0.0789874		Microsetella rosea (Dana, 1847)	0.0739356
Pleuromamma xiphias (Giesbrecht, 1889)	0.0680201		Pareucalanus langae (Fleminger, 1973)	0.0653694
Scaphocalanus brevicornis (Sars G.O., 1900)	0.0676467		Calocalanus tenuis Farran, 1926	0.0628959
Pareucalanus langae (Fleminger, 1973)	0.0646088		Thysanoessa sp.	0.0609579
Microsetella rosea (Dana, 1847)	0.06427		Pleuromamma xiphias (Giesbrecht, 1889)	0.0555555
Amphipoda Hyperia	0.0483223		Heterorhabdus spinifrons (Claus, 1863)	0.0555196
Thysanoessa sp.	0.0473815		Amphipoda Hyperia	0.0496368
Lucicutia flavicornis (Claus, 1863)	0.0328726		Scaphocalanus brevicornis (Sars G.O., 1900)	0.0485561
Mesocalanus tenuicornis (Dana, 1849)	0.0327463		Spinocalanus magnus Wolfenden, 1904	0.0277695
Metridia gerlachei Giesbrecht, 1902	0.0319862		Mesocalanus tenuicornis (Dana, 1849)	0.0253361
Spinocalanus magnus Wolfenden, 1904	0.0275009		Metridia gerlachei Giesbrecht, 1902	0.0251771
Calocalanus tenuis Farran, 1926	0.0274835		Lucicutia flavicornis (Claus, 1863)	0.0232281
Heterorhabdus papilliger	0.0222926		Heterorhabdus papilliger	0.0152432
Euchaeta acuta Giesbrecht, 1893	0.0182069		Euchaeta acuta Giesbrecht, 1893	0.0140278
Lucicutia lucida Farran, 1908	0.0167889		Calocalanus sp.	0.0109041
Aetideus armatus (Boeck, 1872)	0.00954435		Lucicutia lucida Farran, 1908	0.0107317
Haloptilus oxycephalus (Giesbrecht, 1889)	0.00926589		Centropages bradyi Wheeler, 1900	0.00766913
Euchirella rostrata (Claus, 1866)	0.0082582		Pleuromamma quadrungulata (Dahl F., 1893)	0.0073532
Pleuromamma quadrungulata (Dahl F., 1893)	0.00812643		Haloptilus oxycephalus (Giesbrecht, 1889)	0.00698974
Pareuchaeta pseudotonsa (Fontaine, 1967)	0.0077354		Euchirella rostrata (Claus, 1866)	0.00686863
Tomopteris sp.	0.00676998		Pareuchaeta pseudotonsa (Fontaine, 1967)	0.00627974
Amphipoda larvae	0.00666084		Amphipoda Phronima	0.0061872
Calocalanus sp.	0.00600898		Aetideus armatus (Boeck, 1872)	0.00615096
Medusae	0.0058318		Gastropoda larvae	0.00585681
Centropages bradyi Wheeler, 1900	0.00581545		Medusae	0.00558743
Aetideus acutus Farran, 1929	0.00542721		Tomopteris sp.	0.0052648
Amphipoda Phronima	0.00527121		Amphipoda larvae	0.0044902
Amphipoda	0.0050328		Amphipoda	0.0044248
Gastropoda larvae	0.00433491		Fish larvae	0.00419202
Candacia maxima Vervoort, 1957	0.00431842		Candacia maxima Vervoort, 1957	0.00368658
Haloptilus longicornis (Claus, 1863)	0.00420519		Aetideus acutus Farran, 1929	0.00319882
Fish larvae	0.00391266		Scolecithricella glacialis	0.00300326
Heterorhabdus robustus	0.00318906		Haloptilus longicornis (Claus, 1863)	0.00294923
Isopoda	0.00295351		Oculosetella gracilis (Dana, 1849)	0.00284087
Scolecithricella glacialis	0.00294647		Mormonilla minor	0.00256667
Scolecithrix danae (Lubbock, 1856)	0.00269153		Sapphirina angusta Dana, 1849	0.00250407
Scaphocalanus sp.	0.00259899		Rhincalanus nasutus Giesbrecht, 1888	0.00237557
Gaetanus tenuispinus (Sars G.O., 1900)	0.00254526		Clausocalanus furcatus (Brady, 1883)	0.00215628
Amphipoda Themisto	0.00253244		Isopoda	0.00200455
Clausocalanus furcatus (Brady, 1883)	0.00237739		Heterorhabdus robustus	0.0019876
Rhincalanus nasutus Giesbrecht, 1888	0.0022732		Amphipoda Themisto	0.00197026
Scolecithrix bradyi Giesbrecht, 1888	0.00220286		Gaetanus tenuispinus (Sars G.O., 1900)	0.0019307
Oculosetella gracilis (Dana, 1849)	0.00217303		Scaphocalanus sp.	0.00189065
Gaetanus minor Farran, 1905	0.00211005		Scolecithrix danae (Lubbock, 1856)	0.00187716
Amphipoda Scina	0.00205574		Corycaeus furcifer	0.00164943
Corycaeus speciosus Dana, 1849	0.00189434		Sapphirina	0.00163957
Oithona nana Giesbrecht, 1893	0.00185922		Oikopleura sp.	0.00162764
Aetideus giesbrechti Cleve, 1904	0.00185542		Amphipoda Vibilia	0.00147214
Corycaeus furcifer	0.0018098		Scolecithrix bradyi Giesbrecht, 1888	0.00144146
Aetideus australis (Vervoort, 1957)	0.00165857		Gaetanus minor Farran, 1905	0.00142213
Amphipoda Vibilia	0.00153261		Amphipoda Scina	0.00140687
Clytemnestra rostrata	0.00152053		Clytemnestra rostrata	0.00138366
Sapphirina angusta Dana, 1849	0.00140918		Euphausiacea sp.	0.00132915
Bivalvia larvae	0.00138512		Aetideus giesbrechti Cleve, 1904	0.00132572
Mormonilla minor	0.00132083		Cirripedia nauplii	0.00129927
Polychaeta larvae	0.00124539		Oithona nana Giesbrecht, 1893	0.00127189
Lucicutia curta Farran, 1905	0.00124362		Corycaeus speciosus Dana, 1849	0.00124473
Bryozoa larvae	0.00119342		Decapoda larvae	0.00121287
Calocalanus pavo (Dana, 1852)	0.0011641		Candacia cheirura Cleve, 1904	0.00115146
Euphausiacea sp.	0.00116402		Aetideus australis (Vervoort, 1957)	0.00112429
Pareuchaeta biloba Farran, 1929	0.00114582		Bivalvia larvae	0.00111194
Cirripedia nauplii	0.00109822		Pareuchaeta biloba Farran, 1929	0.0010595
Candacia catula (Giesbrecht, 1889)	0.00108859		Polychaeta larvae	0.000902732
Pyrosoma	0.00108505		Bryozoa larvae	0.000873884
Lucicutia ovalis (Giesbrecht, 1889)	0.000984819		Lucicutia curta Farran, 1905	0.000863472
Lophothrix latipes (Scott T., 1894)	0.000976976		Calocalanus pavo (Dana, 1852)	0.000799624
Onychocorycaeus giesbrechti (Dahl F., 1894)	0.000922847		Lophothrix latipes (Scott T., 1894)	0.000792763
Candacia cheirura Cleve, 1904	0.000861405		Candacia catula (Giesbrecht, 1889)	0.00078698
Decapoda larvae	0.000837486		Pyrosoma	0.000729264
Lucicutia clausi (Giesbrecht, 1889)	0.000816102		Aegistus dubius	0.000727254
Pareuchaeta gracilis (Sars G.O., 1905)	0.000687917		Onychocorycaeus giesbrechti (Dahl F., 1894)	0.000647731
Sapphirina	0.00066851		Lucicutia ovalis (Giesbrecht, 1889)	0.000518832
Pareuchaeta sp.	0.000621811		Haloptilus ocellatus Wolfenden, 1905	0.00047753
Haloptilus ocellatus Wolfenden, 1905	0.000614557		Echinodermata larvae	0.000467851
Echinodermata larvae	0.000608702		Eucalanus elongatus elongatus (Dana, 1848)	0.000464053
Scottocalanus securifrons (Scott T., 1894)	0.000604911		Macrosetella gracilis (Dana, 1847)	0.000447827
Aegistus dubius	0.00055691		Pareuchaeta gracilis (Sars G.O., 1905)	0.000443634
Pareuchaeta sarsi (Farran, 1908)	0.000528844		Pareuchaeta sp.	0.000431736
Undeuchaeta plumosa (Lubbock, 1856)	0.000526304		Lucicutia clausi (Giesbrecht, 1889)	0.000388668
Neocalanus gracilis (Dana, 1852)	0.000459702		Scottocalanus securifrons (Scott T., 1894)	0.000386406
Macrosetella gracilis (Dana, 1847)	0.000448203		Phaenna spinifera Claus, 1863	0.000283665
Eucalanus elongatus elongatus (Dana, 1848)	0.000438219		Pareuchaeta sarsi (Farran, 1908)	0.000282982
Phaenna spinifera Claus, 1863	0.00040873		Centropages gracilis (Dana, 1849)	0.000281708
Euchirella intermedia	0.000396828		Farranula rostrata (Claus, 1863)	0.00027823
Pleuromamma robusta (Dahl F., 1893)	0.000380911		Pareuchaeta bisinuata (Sars G.O., 1907)	0.00027823
Corycaeus limbatus	0.000305751		Candacia sp.	0.00027321
Scottocalanus persecans (Giesbrecht, 1895)	0.000294094		Undeuchaeta plumosa (Lubbock, 1856)	0.000272181
Cephalopoda	0.00023107		Cephalopoda	0.000259215
Centropages gracilis (Dana, 1849)	0.000223374		Neocalanus gracilis (Dana, 1852)	0.000248661
Chirundina streetsii Giesbrecht, 1895	0.000217047		Euchirella intermedia	0.00024372
Undinula vulgaris (Dana, 1849)	0.00016779		Pleuromamma robusta (Dahl F., 1893)	0.000223642
Centropages violaceus (Claus, 1863)	0.000158731		Corycaeus limbatus	0.000184342
Heterorhabdus compactus	0.000155453		Scottocalanus persecans (Giesbrecht, 1895)	0.000134218
Candacia sp.	0.000153489		Undinula vulgaris (Dana, 1849)	0.000117769
Amphipoda Eupronoe	0.000151861		Clausocalanus arcuicornis (Dana, 1849)	0.000115929
Farranula rostrata (Claus, 1863)	0.000151861		Heterorhabdus compactus	0.000107012
Pareuchaeta bisinuata (Sars G.O., 1907)	0.000151861		Lubbockia squillimana Claus, 1863	0.000102794
Amphipoda Cyphocaris	0.000148989		Amphipoda Eupronoe	9.85734e-05
Pareuchaeta tonsa (Giesbrecht, 1895)	0.000148676		Centropages violaceus (Claus, 1863)	9.74879e-05
Clausocalanus arcuicornis (Dana, 1849)	0.000147955		Chirundina streetsii Giesbrecht, 1895	9.5819e-05
Lubbockia squillimana Claus, 1863	0.000147023		Subeucalanus monachus (Giesbrecht, 1888)	8.69468e-05
Paraheterorhabdus robustus (Farran, 1908)	8.38952e-05		Pareuchaeta tonsa (Giesbrecht, 1895)	8.29571e-05
Candacia varicans (Giesbrecht, 1893)	7.93656e-05		Amphipoda Cyphocaris	7.99982e-05
Subeucalanus longiceps (Matthews, 1925)	7.93656e-05		Aetideopsis rostrata Sars G.O., 1903	7.82522e-05
Aetideopsis rostrata Sars G.O., 1903	7.77264e-05		Lubbockia aculeata Giesbrecht, 1891	6.26017e-05
Heterostylites major (Dahl F., 1894)	7.77264e-05		Mysidacea Echinomysis Illig, 1905	6.26017e-05
Aetideopsis carinata Bradford, 1969	7.72048e-05		Paraheterorhabdus robustus (Farran, 1908)	5.88846e-05
Haloptilus spiniceps (Giesbrecht, 1893)	7.72048e-05		Aetideopsis carinata Bradford, 1969	5.69107e-05
Euchirella truncata Esterly, 1911	7.66901e-05		Heterostylites major (Dahl F., 1894)	5.3967e-05
Lubbockia aculeata Giesbrecht, 1891	7.66901e-05		Euchirella truncata Esterly, 1911	5.08957e-05
Spinocalanus brevicaudatus Brodsky, 1950	7.66901e-05		Candacia varicans (Giesbrecht, 1893)	4.87439e-05
Eucalanus hyalinus (Claus, 1866)	7.61822e-05		Subeucalanus longiceps (Matthews, 1925)	4.87439e-05
Euchirella sp.	7.61822e-05		Chiridius gracilis Farran, 1908	4.77876e-05
Mysidacea Echinomysis Illig, 1905	7.61822e-05		Haloptilus spiniceps (Giesbrecht, 1893)	4.47155e-05
Amphipoda Rhabdosoma	7.54328e-05		Amphipoda Rhabdosoma	4.09162e-05
Amphipoda Streetsia	7.54328e-05		Amphipoda Streetsia	4.09162e-05
Gaetanus robustus Sars G.O., 1905	7.51863e-05		Eucalanus hyalinus (Claus, 1866)	3.91261e-05
Chiridius gracilis Farran, 1908	7.39775e-05		Euchirella sp.	3.91261e-05
Gaetanus miles Giesbrecht, 1888	7.23491e-05		Gaetanus robustus Sars G.O., 1905	3.88831e-05
Nullosetigera helgae (Farran, 1908)	7.23491e-05		Spinocalanus brevicaudatus Brodsky, 1950	3.43966e-05
Subeucalanus monachus (Giesbrecht, 1888)	7.23491e-05		Gaetanus miles Giesbrecht, 1888	3.19397e-05
Valdiviella minor Wolfenden, 1911	7.23491e-05		Nullosetigera helgae (Farran, 1908)	3.19397e-05
			Valdiviella minor Wolfenden, 1911	3.19397e-05
